# Supplementary material for: Light spectrum modifies the utilization pattern of energy sources in Pseudomonas sp. DR 5-09
Source: PubMed Central journal article supplement (PMC5739431; doi:10.1371/journal.pone.0189862), 2017-12-21
Supplement: pone.0189862.s002.pdf [file pone.0189862.s002.pdf]

Table Suppl S2. Substrate overlay on the four selected PM panels (PM1, PM2, PM3, PM4 according to Biolog Inc., Haywood, USA)

| Position | PM01                              | PM02                                  | PM03                        | PM04                                   |
|----------|-----------------------------------|---------------------------------------|-----------------------------|----------------------------------------|
|          | <i>Carbon sources</i>             |                                       | <i>Nitrogen sources</i>     | <i>Phosphorus and sulphur sources</i>  |
| A01      | Negative Control                  | Negative Control                      | Negative Control            | Negative Control                       |
| A02      | L-Arabinose                       | Chondroitin Sulfate C                 | Ammonia                     | Phosphate                              |
| A03      | N-Acetyl-D-Glucosamine            | α-Cyclodextrin                        | Nitrite                     | Pyrophosphate                          |
| A04      | D-Saccharic Acid                  | β-Cyclodextrin                        | Nitrate                     | Trimeta-phosphate                      |
| A05      | Succinic Acid                     | γ-Cyclodextrin                        | Urea                        | Tripoly-phosphate                      |
| A06      | D-Galactose                       | Dextrin                               | Biuret                      | Triethyl Phosphate                     |
| A07      | L-Aspartic Acid                   | Gelatin                               | L-Alanine                   | Hypophosphite                          |
| A08      | L-Proline                         | Glycogen                              | L-Arginine                  | Adenosine- 2'-monophosphate            |
| A09      | D-Alanine                         | Inulin                                | L-Asparagine                | Adenosine- 3'-monophosphate            |
| A10      | D-Trehalose                       | Laminarin                             | L-Aspartic Acid             | Adenosine- 5'-monophosphate            |
| A11      | D-Mannose                         | Mannan                                | L-Cysteine                  | Adenosine- 2',3'-cyclic monophosphate  |
| A12      | Dulcitol                          | Pectin                                | L-Glutamic Acid             | Adenosine- 3',5'-cyclic monophosphate  |
| B01      | D-Serine                          | N-Acetyl-D-Galactosamine              | L-Glutamine                 | Thio-phosphate                         |
| B02      | D-Sorbitol                        | N-Acetyl-Neuraminic Acid              | Glycine                     | Dithio-phosphate                       |
| B03      | Glycerol                          | β-D-Allose                            | L-Histidine                 | D,L-α-Glycerol Phosphate               |
| B04      | L-Fucose                          | Amygdalin                             | L-Isoleucine                | β-Glycerol Phosphate                   |
| B05      | D-Glucuronic Acid                 | D-Arabinose                           | L-Leucine                   | Carbamyl Phosphate                     |
| B06      | D-Gluconic Acid                   | D-Arabitol                            | L-Lysine                    | D-2-Phospho-Glyceric Acid              |
| B07      | D,L-α-Glycerol- Phosphate         | L-Arabitol                            | L-Methionine                | D-3-Phospho-Glyceric Acid              |
| B08      | D-Xylose                          | Arbutin                               | L-Phenylalanine             | Guanosine- 2'-monophosphate            |
| B09      | L-Lactic Acid                     | 2-Deoxy-D-Ribose                      | L-Proline                   | Guanosine- 3'-monophosphate            |
| B10      | Formic Acid                       | i-Erythritol                          | L-Serine                    | Guanosine- 5'-monophosphate            |
| B11      | D-Mannitol                        | D-Fucose                              | L-Threonine                 | Guanosine- 2',3'-cyclic monophosphate  |
| B12      | L-Glutamic Acid                   | 3-O-β-D-Galacto-pyranosyl-D-Arabinose | L-Tryptophan                | Guanosine- 3',5'-cyclic monophosphate  |
| C01      | D-Glucose-6-Phosphate             | Gentiobiose                           | L-Tyrosine                  | Phosphoenol Pyruvate                   |
| C02      | D-Galactonic Acid-γ-Lactone       | L-Glucose                             | L-Valine                    | Phospho- Glycolic Acid                 |
| C03      | D,L-Malic Acid                    | Lactitol                              | D-Alanine                   | D-Glucose-1-Phosphate                  |
| C04      | D-Ribose                          | D-Melezitose                          | D-Asparagine                | D-Glucose-6-Phosphate                  |
| C05      | Tween 20                          | Maltitol                              | D-Aspartic Acid             | 2-Deoxy-D-Glucose 6-Phosphate          |
| C06      | L-Rhamnose                        | α-Methyl-D-Glucoside                  | D-Glutamic Acid             | D-Glucos-amine-6-Phosphate             |
| C07      | D-Fructose                        | β-Methyl-D-Galactoside                | D-Lysine                    | 6-Phospho-Gluconic Acid                |
| C08      | Acetic Acid                       | 3-Methyl Glucose                      | D-Serine                    | Cytidine- 2'- monophosphate            |
| C09      | α-D-Glucose                       | β-Methyl-D-Glucuronic Acid            | D-Valine                    | Cytidine- 3'- monophosphate            |
| C10      | Maltose                           | α-Methyl-D-Mannoside                  | L-Citrulline                | Cytidine- 5'- monophosphate            |
| C11      | D-Melibiose                       | β-Methyl-D-Xyloside                   | L-Homoserine                | Cytidine- 2',3'-cyclic monophosphate   |
| C12      | Thymidine                         | Palatinose                            | L-Ornithine                 | Cytidine- 3',5'-cyclic monophosphate   |
| D01      | L-Asparagine                      | D-Raffinose                           | N-Acetyl-L-Glutamic Acid    | D-Mannose-1-Phosphate                  |
| D02      | D-Aspartic Acid                   | Salicin                               | N-Phthaloyl-L-Glutamic Acid | D-Mannose-6-Phosphate                  |
| D03      | D-Glucosaminic Acid               | Sedoheptulosan                        | L-Pyroglytamic Acid         | Cysteamine-S-Phosphate                 |
| D04      | 1,2-Propanediol                   | L-Sorbose                             | Hydroxylamine               | Phospho-L-Arginine                     |
| D05      | Tween 40                          | Stachyose                             | Methylamine                 | O-Phospho-D-Serine                     |
| D06      | α-Keto-Glutaric Acid              | D-Tagatose                            | N-Amylamine                 | O-Phospho-L-Serine                     |
| D07      | α-Keto-Butyric Acid               | Turanose                              | N-Butylamine                | O-Phospho-L-Threonine                  |
| D08      | α-Methyl-D-Galactoside            | Xylitol                               | Ethylamine                  | Uridine- 2'- monophosphate             |
| D09      | α-D-Lactose                       | N-Acetyl-D-Glucosaminitol             | Ethanolamine                | Uridine- 3'- monophosphate             |
| D10      | Lactulose                         | γ-Amino Butyric Acid                  | Ethylenediamine             | Uridine- 5'- monophosphate             |
| D11      | Sucrose                           | δ-Amino Valeric Acid                  | Putrescine                  | Uridine- 2',3'- cyclic monophosphate   |
| D12      | Uridine                           | Butyric Acid                          | Agmatine                    | Uridine- 3',5'- cyclic monophosphate   |
| E01      | L-Glutamine                       | Capric Acid                           | Histamine                   | O-Phospho-D-Tyrosine                   |
| E02      | m-Tartaric Acid                   | Caproic Acid                          | β-Phenylethyl- amine        | O-Phospho-L-Tyrosine                   |
| E03      | D-Glucose-1-Phosphate             | Citraconic Acid                       | Tyramine                    | Phospho-creatine                       |
| E04      | D-Fructose-6-Phosphate            | Citramalic Acid                       | Acetamide                   | Phosphoryl Choline                     |
| E05      | Tween 80                          | D-Glucosamine                         | Formamide                   | O-Phosphoryl-Ethanolamine              |
| E06      | α-Hydroxy Glutaric Acid-γ-Lactone | 2-Hydroxy Benzoic Acid                | Glucuronamide               | Phosphono Acetic Acid                  |
| E07      | α-Hydroxy Butyric Acid            | 4-Hydroxy Benzoic Acid                | D,L-Lactamide               | 2-Aminoethyl Phosphonic Acid           |
| E08      | β-Methyl-D-Glucoside              | β-Hydroxy Butyric Acid                | D-Glucosamine               | Methylene Diphosphonic Acid            |
| E09      | Adonitol                          | γ-Hydroxy Butyric Acid                | D-Galactosamine             | Thymidine- 3'-monophosphate            |
| E10      | Maltotriose                       | α-Keto-Valeric Acid                   | D-Mannosamine               | Thymidine- 5'-monophosphate            |
| E11      | 2-Deoxy Adenosine                 | Itaconic Acid                         | N-Acetyl-D-Glucosamine      | Inositol Hexa-phosphate                |
| E12      | Adenosine                         | 5-Keto-D-Gluconic Acid                | N-Acetyl-D-Galactosamine    | Thymidine 3',5'- cyclic mono-phosphate |
| F01      | Glycyl-L-Aspartic Acid            | D-Lactic Acid Methyl Ester            | N-Acetyl-D-Mannosamine      | Negative Control                       |
| F02      | Citric Acid                       | Malonic Acid                          | Adenine                     | Sulfate                                |
| F03      | m-Inositol                        | Melibionic Acid                       | Adenosine                   | Thiosulfate                            |
| F04      | D-Threonine                       | Oxalic Acid                           | Cytidine                    | Tetrathionate                          |
| F05      | Fumaric Acid                      | Oxalomalic Acid                       | Cytosine                    | Thio-phosphate                         |
| F06      | Bromo Succinic Acid               | Quinic Acid                           | Guanine                     | Dithio-phosphate                       |
| F07      | Propionic Acid                    | D-Ribono-1,4-Lactone                  | Guanosine                   | L-Cysteine                             |
| F08      | Mucic Acid                        | Sebacic Acid                          | Thymine                     | D-Cysteine                             |
| F09      | Glycolic Acid                     | Sorbic Acid                           | Thymidine                   | L-Cysteiny-Glycine                     |
| F10      | Glyoxylic Acid                    | Succinamic Acid                       | Uracil                      | L-Cystaic Acid                         |
| F11      | D-Cellobiose                      | D-Tartaric Acid                       | Uridine                     | Cysteamine                             |
| F12      | Inosine                           | L-Tartaric Acid                       | Inosine                     | L-Cysteine Sulfinic Acid               |
| G01      | Glycyl-L-Glutamic Acid            | Acetamide                             | Xanthine                    | N-Acetyl-L-Cysteine                    |
| G02      | Tricarballic Acid                 | L-Alaninamide                         | Xanthosine                  | S-Methyl-L-Cysteine                    |
| G03      | L-Serine                          | N-Acetyl-L-Glutamic Acid              | Uric Acid                   | Cystathionine                          |
| G04      | L-Threonine                       | L-Arginine                            | Alloxan                     | Lanthionine                            |
| G05      | L-Alanine                         | Glycine                               | Allantoin                   | Glutathione                            |
| G06      | L-Alanyl-Glycine                  | L-Histidine                           | Parabanic Acid              | D,L-Ethionine                          |
| G07      | Acetoacetic Acid                  | L-Homoserine                          | D,L-α-Amino-N-Butyric Acid  | L-Methionine                           |
| G08      | N-Acetyl-β-D-Mannosamine          | Hydroxy-L-Proline                     | γ-Amino-N-Butyric Acid      | D-Methionine                           |
| G09      | Mono Methyl Succinate             | L-Isoleucine                          | ε-Amino-N-Caproic Acid      | Glycyl-L-Methionine                    |
| G10      | Methyl Pyruvate                   | L-Leucine                             | D,L-α-Amino- Caprylic Acid  | N-Acetyl-D,L-Methionine                |
| G11      | D-Malic Acid                      | L-Lysine                              | δ-Amino-N-Valeric Acid      | L- Methionine Sulfoxide                |
| G12      | L-Malic Acid                      | L-Methionine                          | α-Amino-N-Valeric Acid      | L-Methionine Sulfone                   |
| H01      | Glycyl-L-Proline                  | L-Ornithine                           | Ala-Asp                     | L-Djenkolic Acid                       |
| H02      | p-Hydroxy Phenyl Acetic Acid      | L-Phenylalanine                       | Ala-Gln                     | Thiourea                               |
| H03      | m-Hydroxy Phenyl Acetic Acid      | L-Pyroglytamic Acid                   | Ala-Glu                     | 1-Thio-β-D-Glucose                     |
| H04      | Tyramine                          | L-Valine                              | Ala-Gly                     | D,L-Lipoamide                          |
| H05      | D-Psicose                         | D,L-Carnitine                         | Ala-His                     | Taurocholic Acid                       |
| H06      | L-Lyxose                          | Sec-Butylamine                        | Ala-Leu                     | Taurine                                |
| H07      | Glucuronamide                     | D,L-Octopamine                        | Ala-Thr                     | Hypotaurine                            |
| H08      | Pyruvic Acid                      | Putrescine                            | Gly-Asn                     | p-Amino Benzene Sulfonic Acid          |
| H09      | L-Galactonic Acid-γ-Lactone       | Dihydroxy Acetone                     | Gly-Gln                     | Butane Sulfonic Acid                   |
| H10      | D-Galacturonic Acid               | 2,3-Butanediol                        | Gly-Glu                     | 2-Hydroxyethane Sulfonic Acid          |
| H11      | Phenylethylamine                  | 2,3-Butanone                          | Gly-Met                     | Methane Sulfonic Acid                  |
| H12      | 2-Aminoethanol                    | 3-Hydroxy 2-Butanone                  | Met-Ala                     | Tetra-methylene Sulfone                |
