# Supplementary material for: Light spectrum modifies the utilization pattern of energy sources in Pseudomonas sp. DR 5-09
Source: PubMed Central journal article supplement (PMC5739431; doi:10.1371/journal.pone.0189862), 2017-12-21
Supplement: pone.0189862.s004.pdf [file pone.0189862.s004.pdf]

Color Key and Histogram

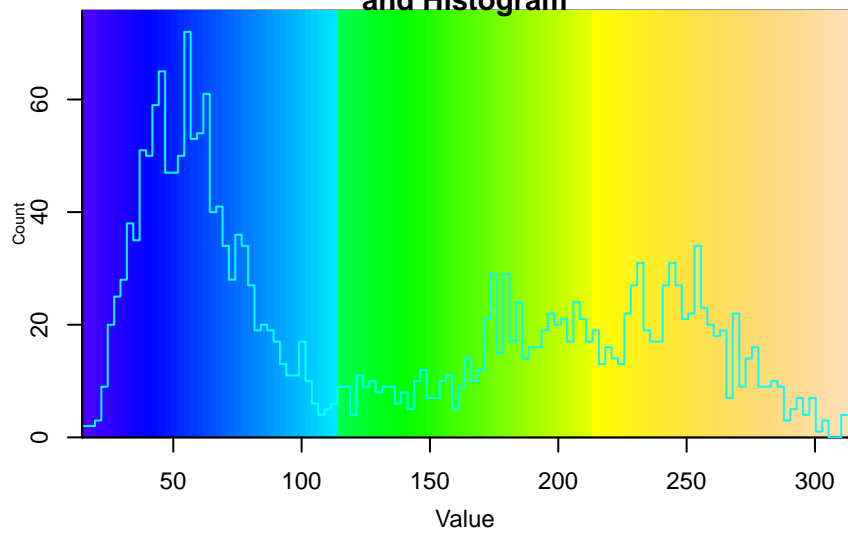

PM01 strain 2 -A

- Blue light
- Dark
- Red light
- White light

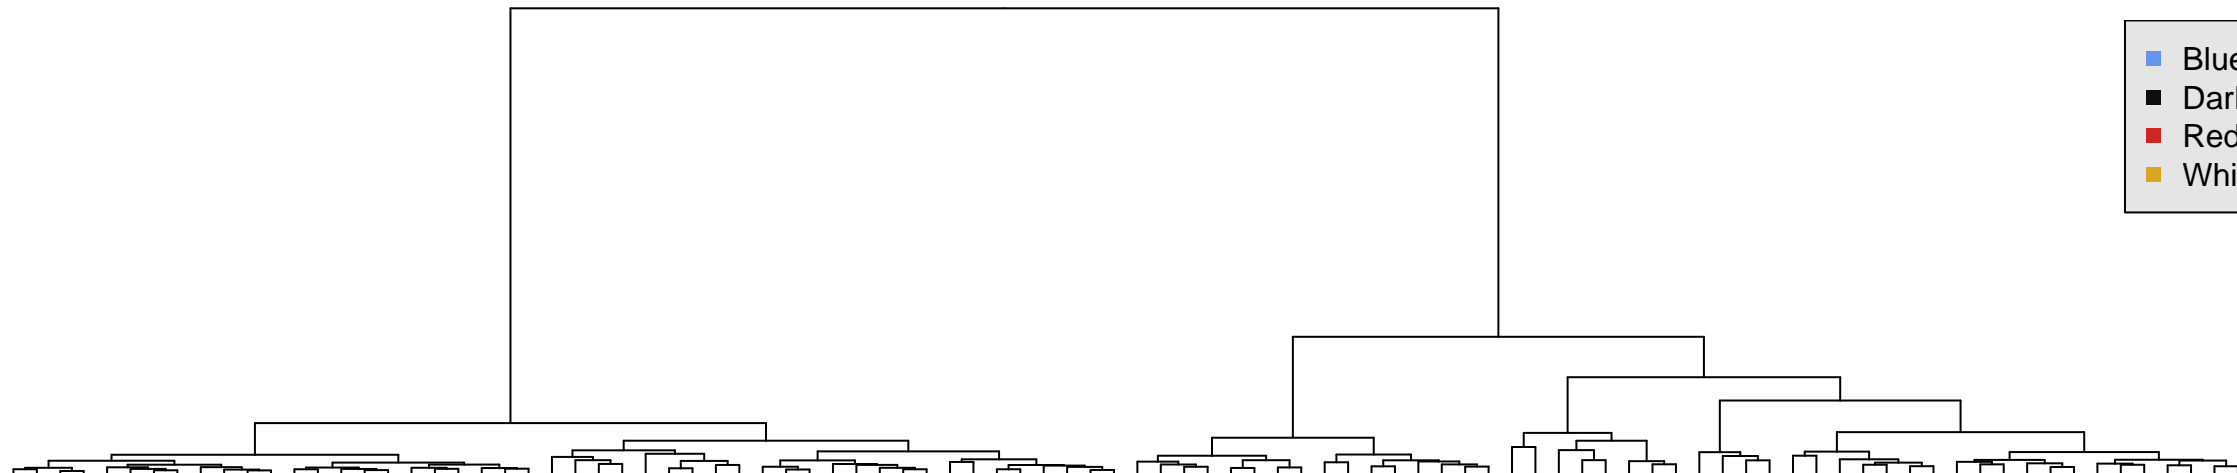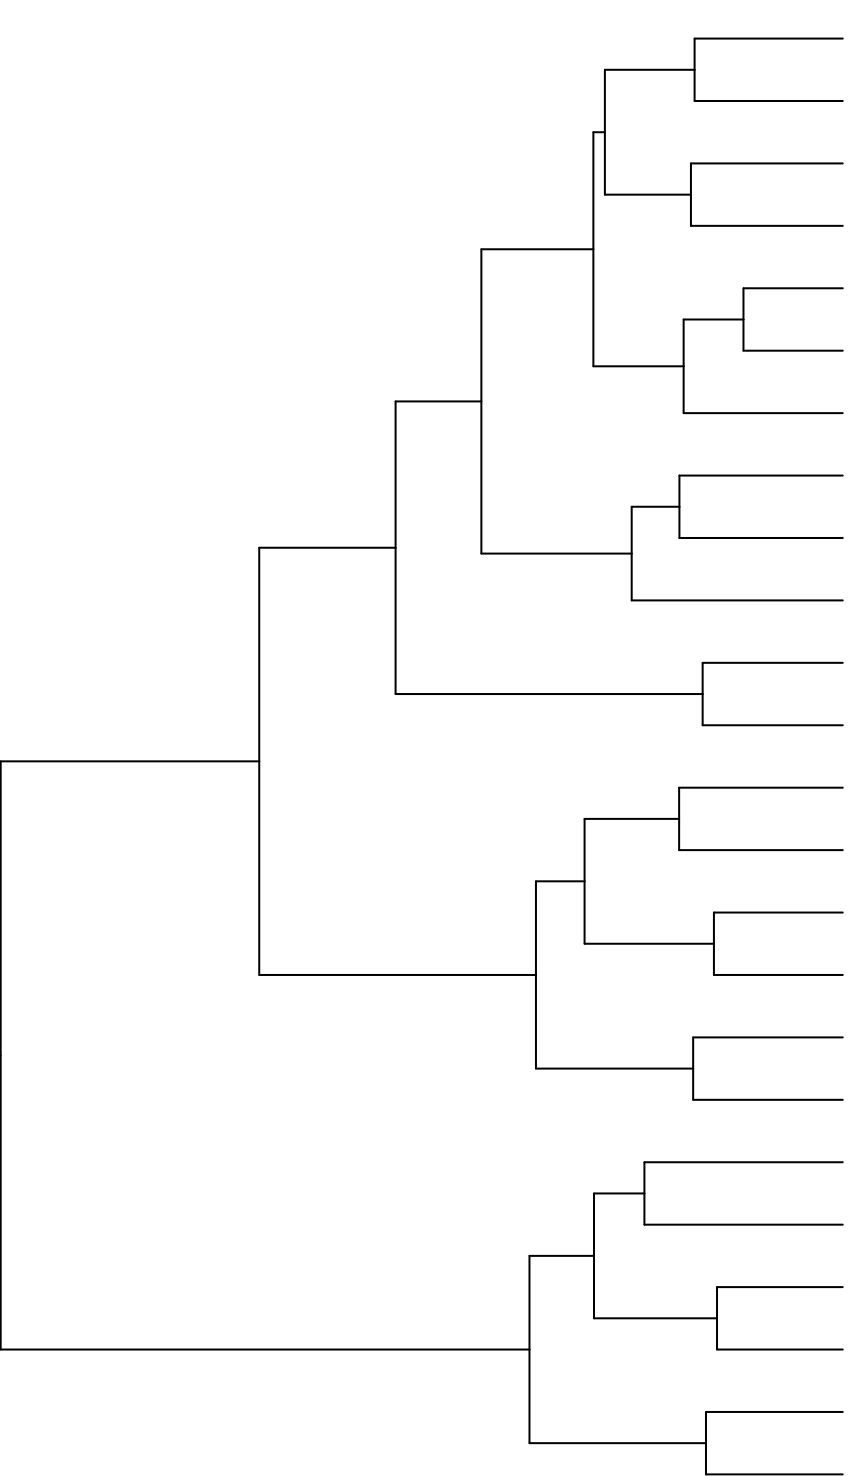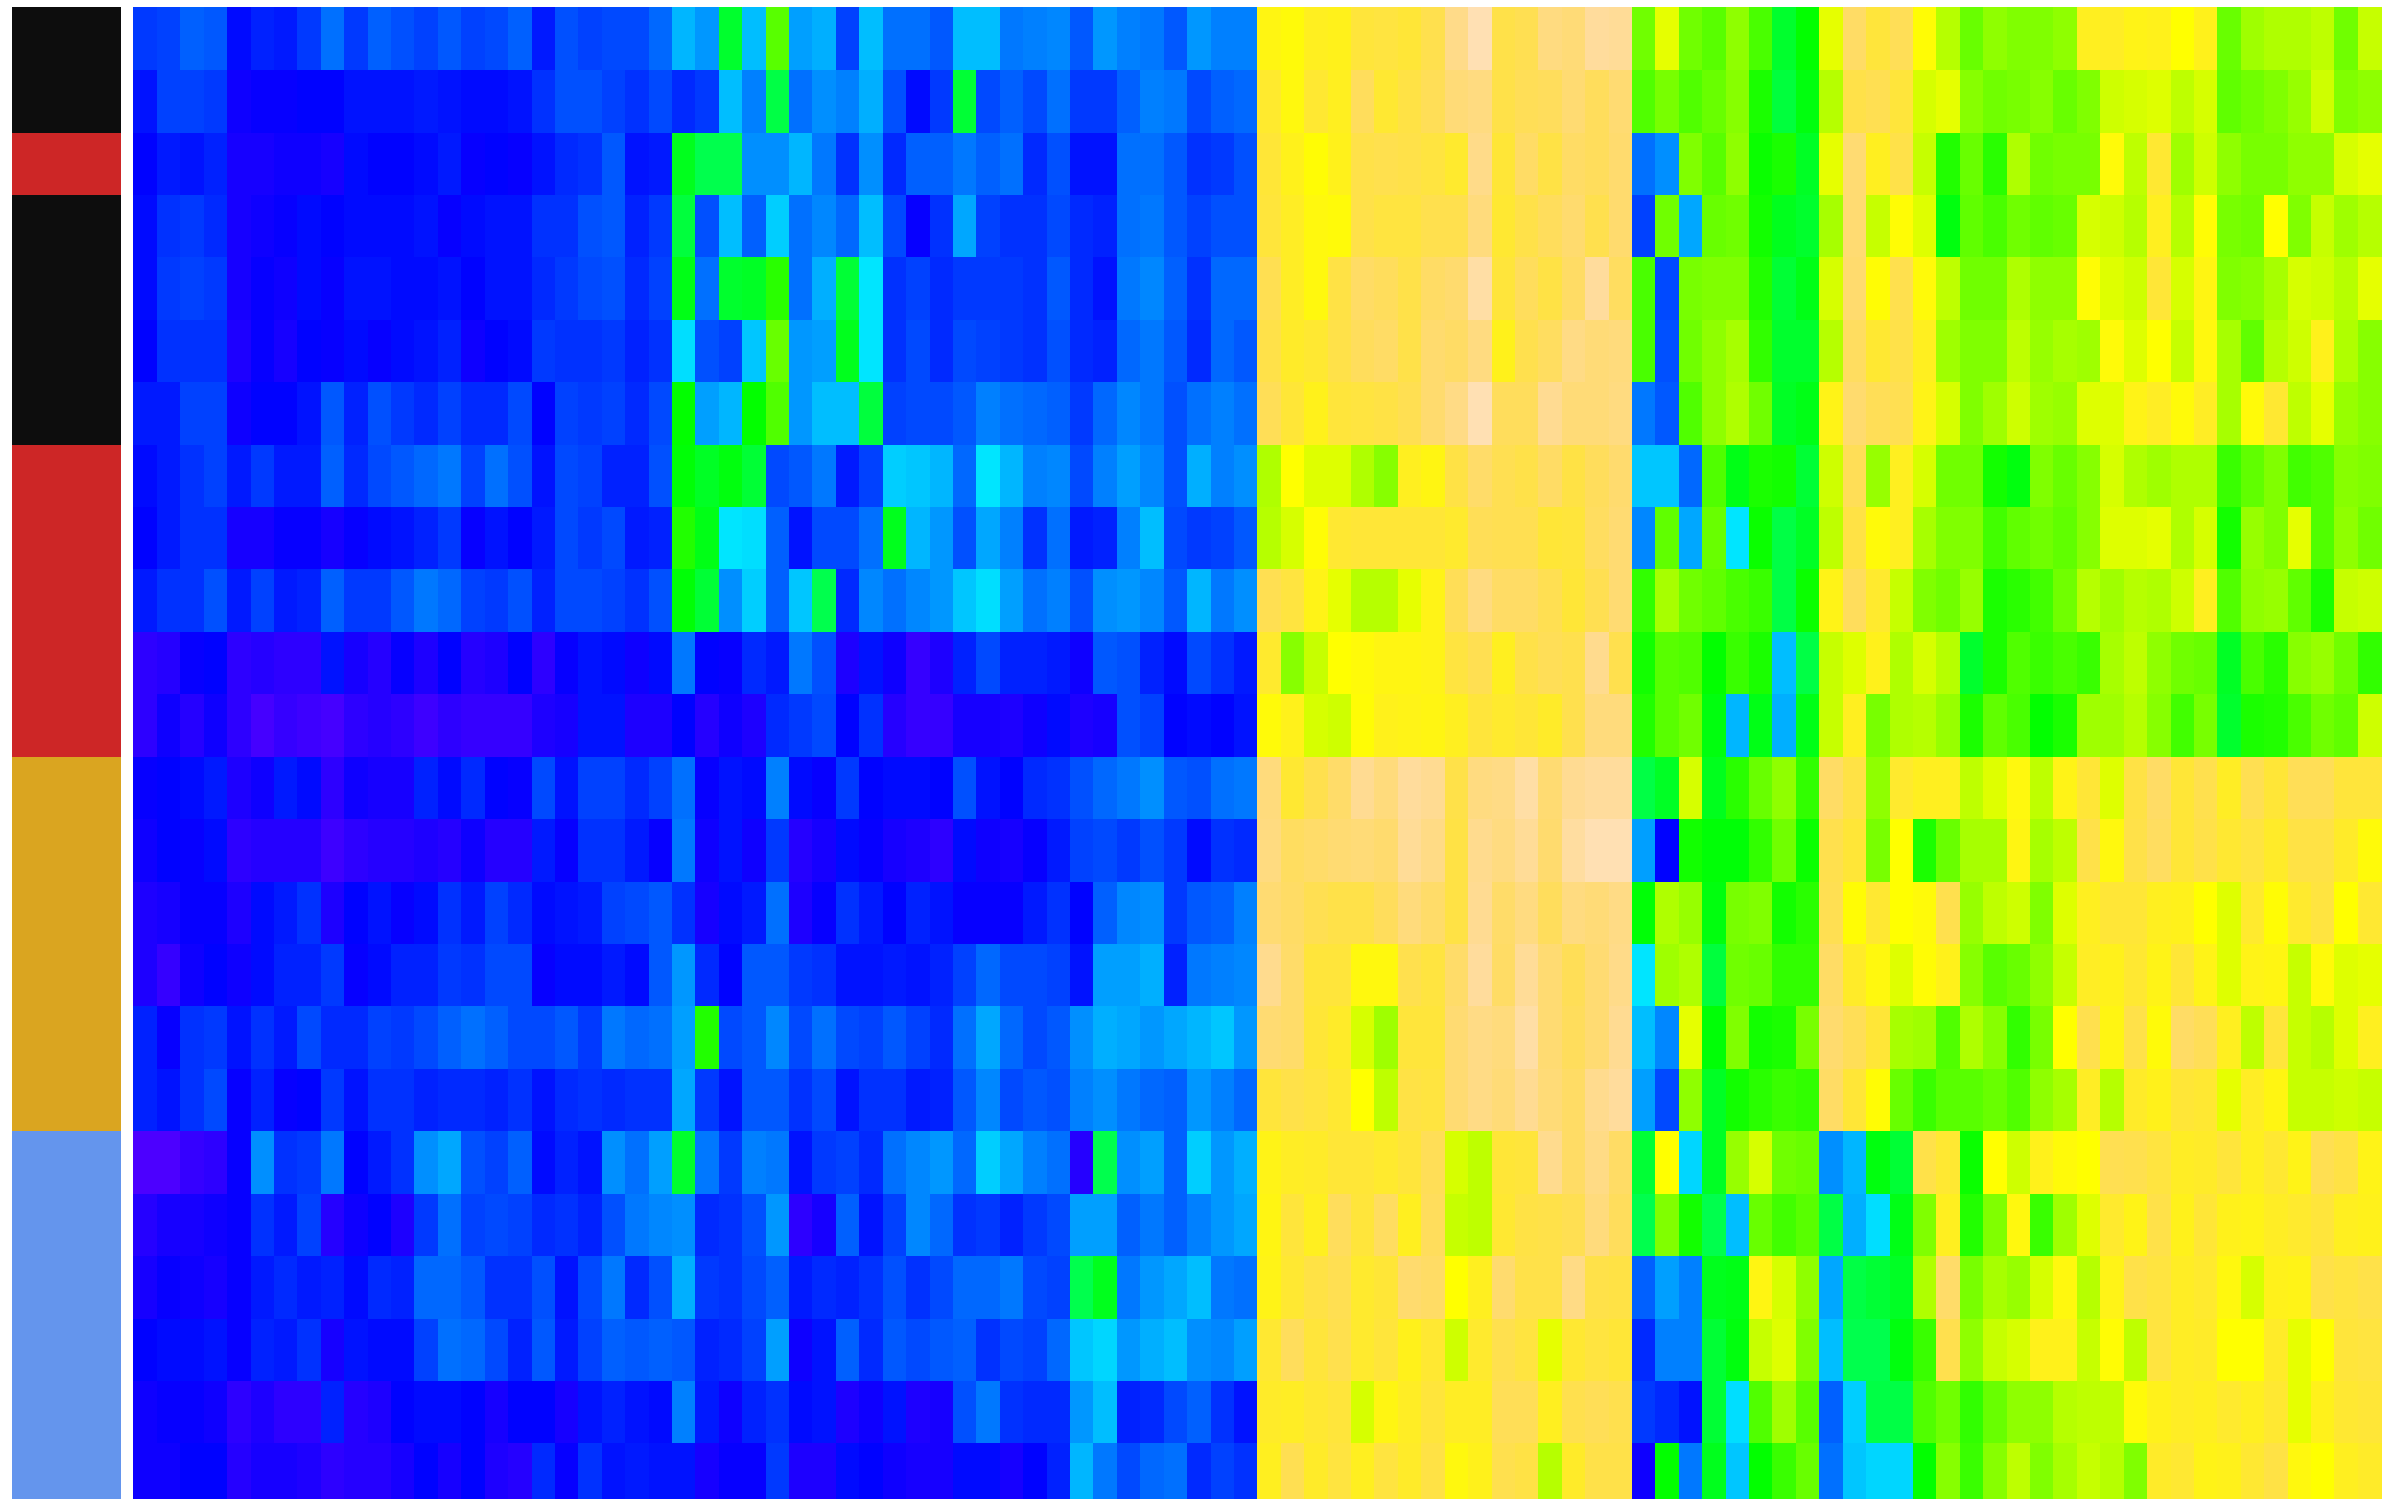

H04 (Tyramine)  
 H05 (L-Lyxose)  
 H02 (m-Hydroxy-Phenylacetic Acid)  
 H03 (p-Hydroxy-Phenylacetic Acid)  
 F10 (Glyceric Acid)  
 E9 (Adonitol)  
 F09 (Dyckide Acid)  
 F03 (epi-Inositol)  
 C06 (L-Rhamnose)  
 G02 (Tetrahydroxyphenylacetic Acid)  
 F04 (D-Threosamine)  
 B06 (p-Hydroxy-Quinic Acid-9-Lactone)  
 E11 (2-Oxooxy-Akaronine)  
 C08 (p-Methyl-D-Glucoside)  
 E04 (D-Fructose-6-Phosphate)  
 E03 (a-D-Glucose-1-Phosphate)  
 D04 (L-2-Propanediol)  
 H10 (p-Phenylglyoxal)  
 H07 (Glucosamine)  
 G11 (D-Malic Acid)  
 A12 (Galactose)  
 H05 (D-Fructose)  
 D03 (D-Arginine Acid)  
 A10 (D-Threosine)  
 D11 (Sucrose)  
 F11 (D-Cellobiose)  
 B06 (D-Gluconic Acid)  
 H03 (p-Carboxylic Acid-9-Lactone)  
 D07 (p-Hydroxy-Butyric Acid)  
 E07 (p-Hydroxy-Butyric Acid)  
 H10 (D-Galacturonic Acid)  
 G04 (L-Threonine)  
 D08 (p-D-Lactone)  
 C08 (N-Acetyl-p-D-Mannosamine)  
 E08 (p-Methyl-D-Glucoside)  
 C11 (D-Melibiose)  
 C12 (Thymidine)  
 D10 (Lactulose)  
 B04 (L-Fucose)  
 B02 (D-Sorbitol)  
 C07 (Ascorbic Acid)  
 B10 (Sorbitol Sorbitol)  
 B01 (D-Serine)  
 A01 (Negative Control)  
 C09 (Methyl-Methyl Succinate)  
 B09 (D,L-α-Glycerol-Phosphate)  
 F01 (D-Glycerol-3-Phosphate)  
 C01 (D-Glucose-6-Phosphate)  
 F08 (Fructose Acid)  
 H03 (Pyruvic Acid)  
 C08 (D,L-Malic Acid)  
 C08 (D-Glucose)  
 A05 (L-Proline)  
 B12 (L-Glutamic Acid)  
 B06 (D-Gluconic Acid)  
 A07 (L-Arginine Acid)  
 F02 (Citric Acid)  
 F08 (Mucic Acid)  
 G12 (L-Malic Acid)  
 G02 (L-Serine)  
 A02 (L-Aminononanoic Acid)  
 A04 (D-Succinic Acid)  
 E01 (L-Glutamic Acid)  
 D11 (Asparagine)  
 C10 (D-Malic Acid)  
 E10 (Mannoside)  
 H01 (D-Fructose)  
 H12 (Ethanamine)  
 B03 (D-Glucose)  
 B00 (D-D-Fructose)  
 C02 (D-Cellobionic Acid-9-Lactone)  
 F06 (Bromo-Succinic Acid)  
 E03 (m-Phthalic Acid)  
 E08 (Trimethylolpropane Triacrylate)  
 C08 (Trimethylolpropane Triacrylate)  
 D08 (Trimethylolpropane Triacrylate)  
 A03 (N-Acetyl-D-Glucosamine)  
 C08 (Acetic Acid)  
 G10 (Methyl Pyruvate)  
 B09 (L-Lactic Acid)  
 A11 (D-Mannitol)  
 C04 (D-Ribose)  
 D03 (D-Gluconamic Acid)  
 G01 (D-Glucose)  
 C07 (D-Fructose)  
 A05 (Succinic Acid)  
 B11 (D-Mannitol)  
 G06 (L-Aminononanoic Acid)  
 F12 (Inositol)  
 E12 (Adonitol)  
 F07 (Propionic Acid)  
 G05 (N-Cetyl)  
 A02 (D-Aminononanoic Acid)  
 A01 (D-Galacturonic Acid)  
 D12 (D-Glucose)  
 D06 (p-Hydroxy-Quinic Acid)

Color Key and Histogram

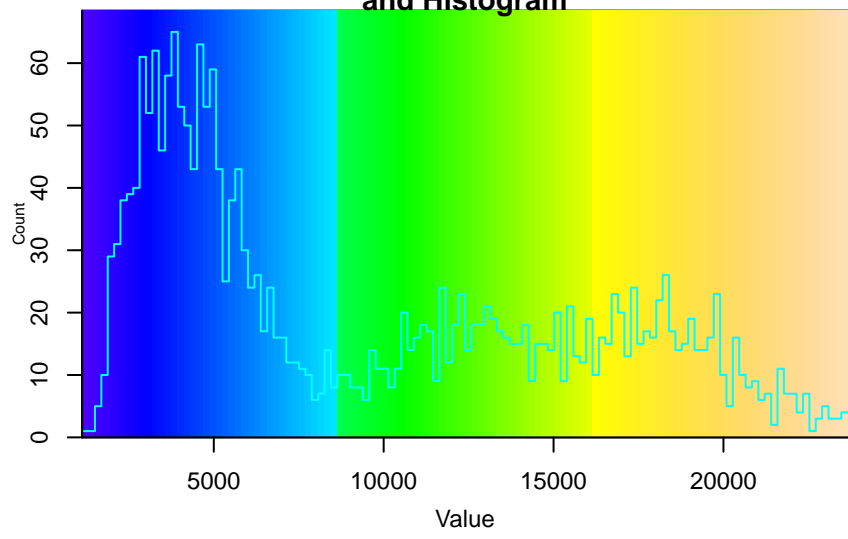

PM01 strain 2 -AUC

- Blue light
- Dark
- Red light
- White light

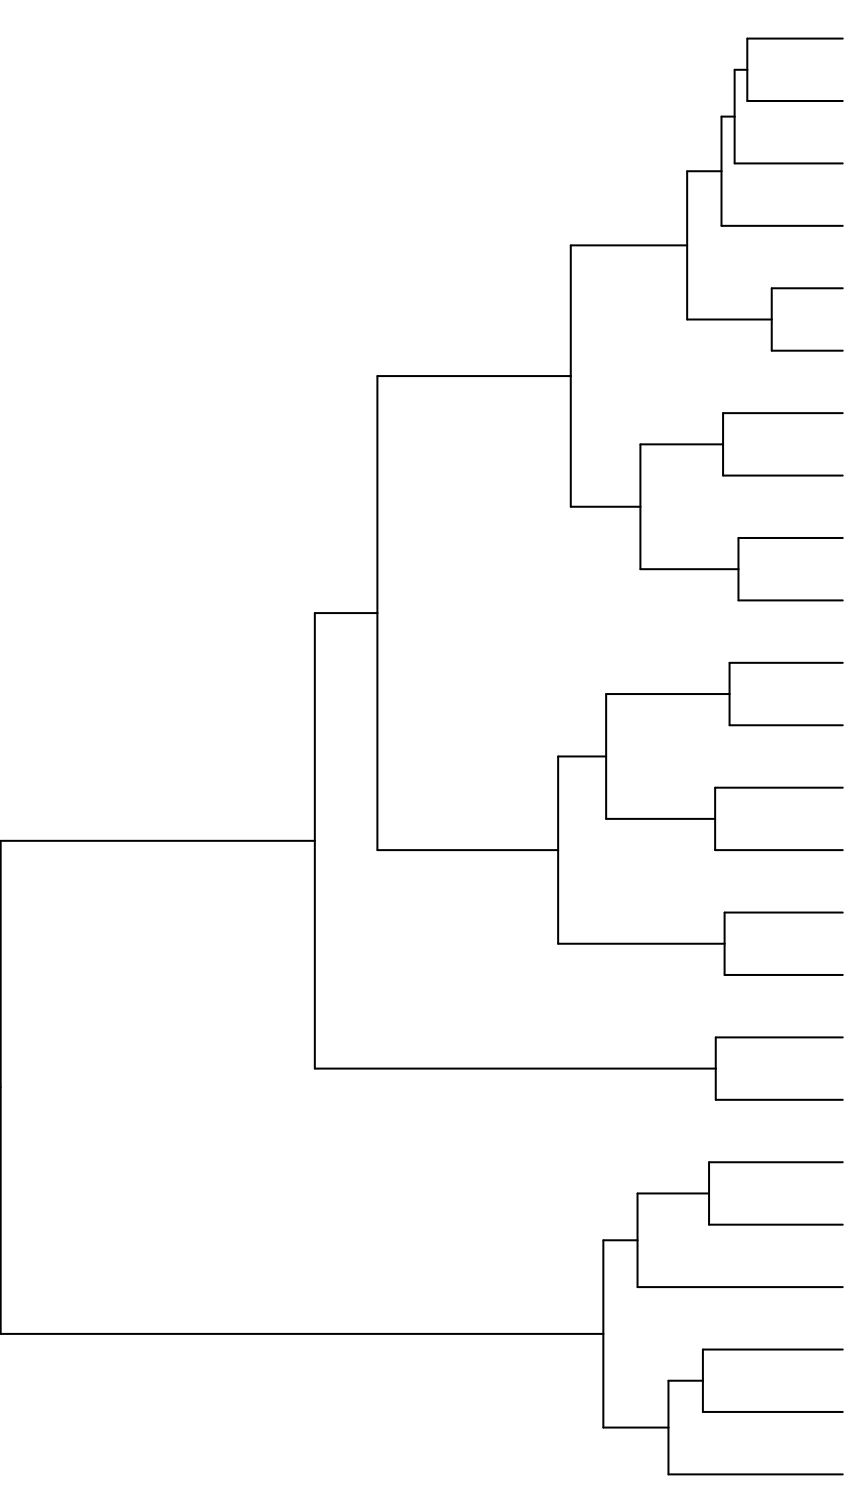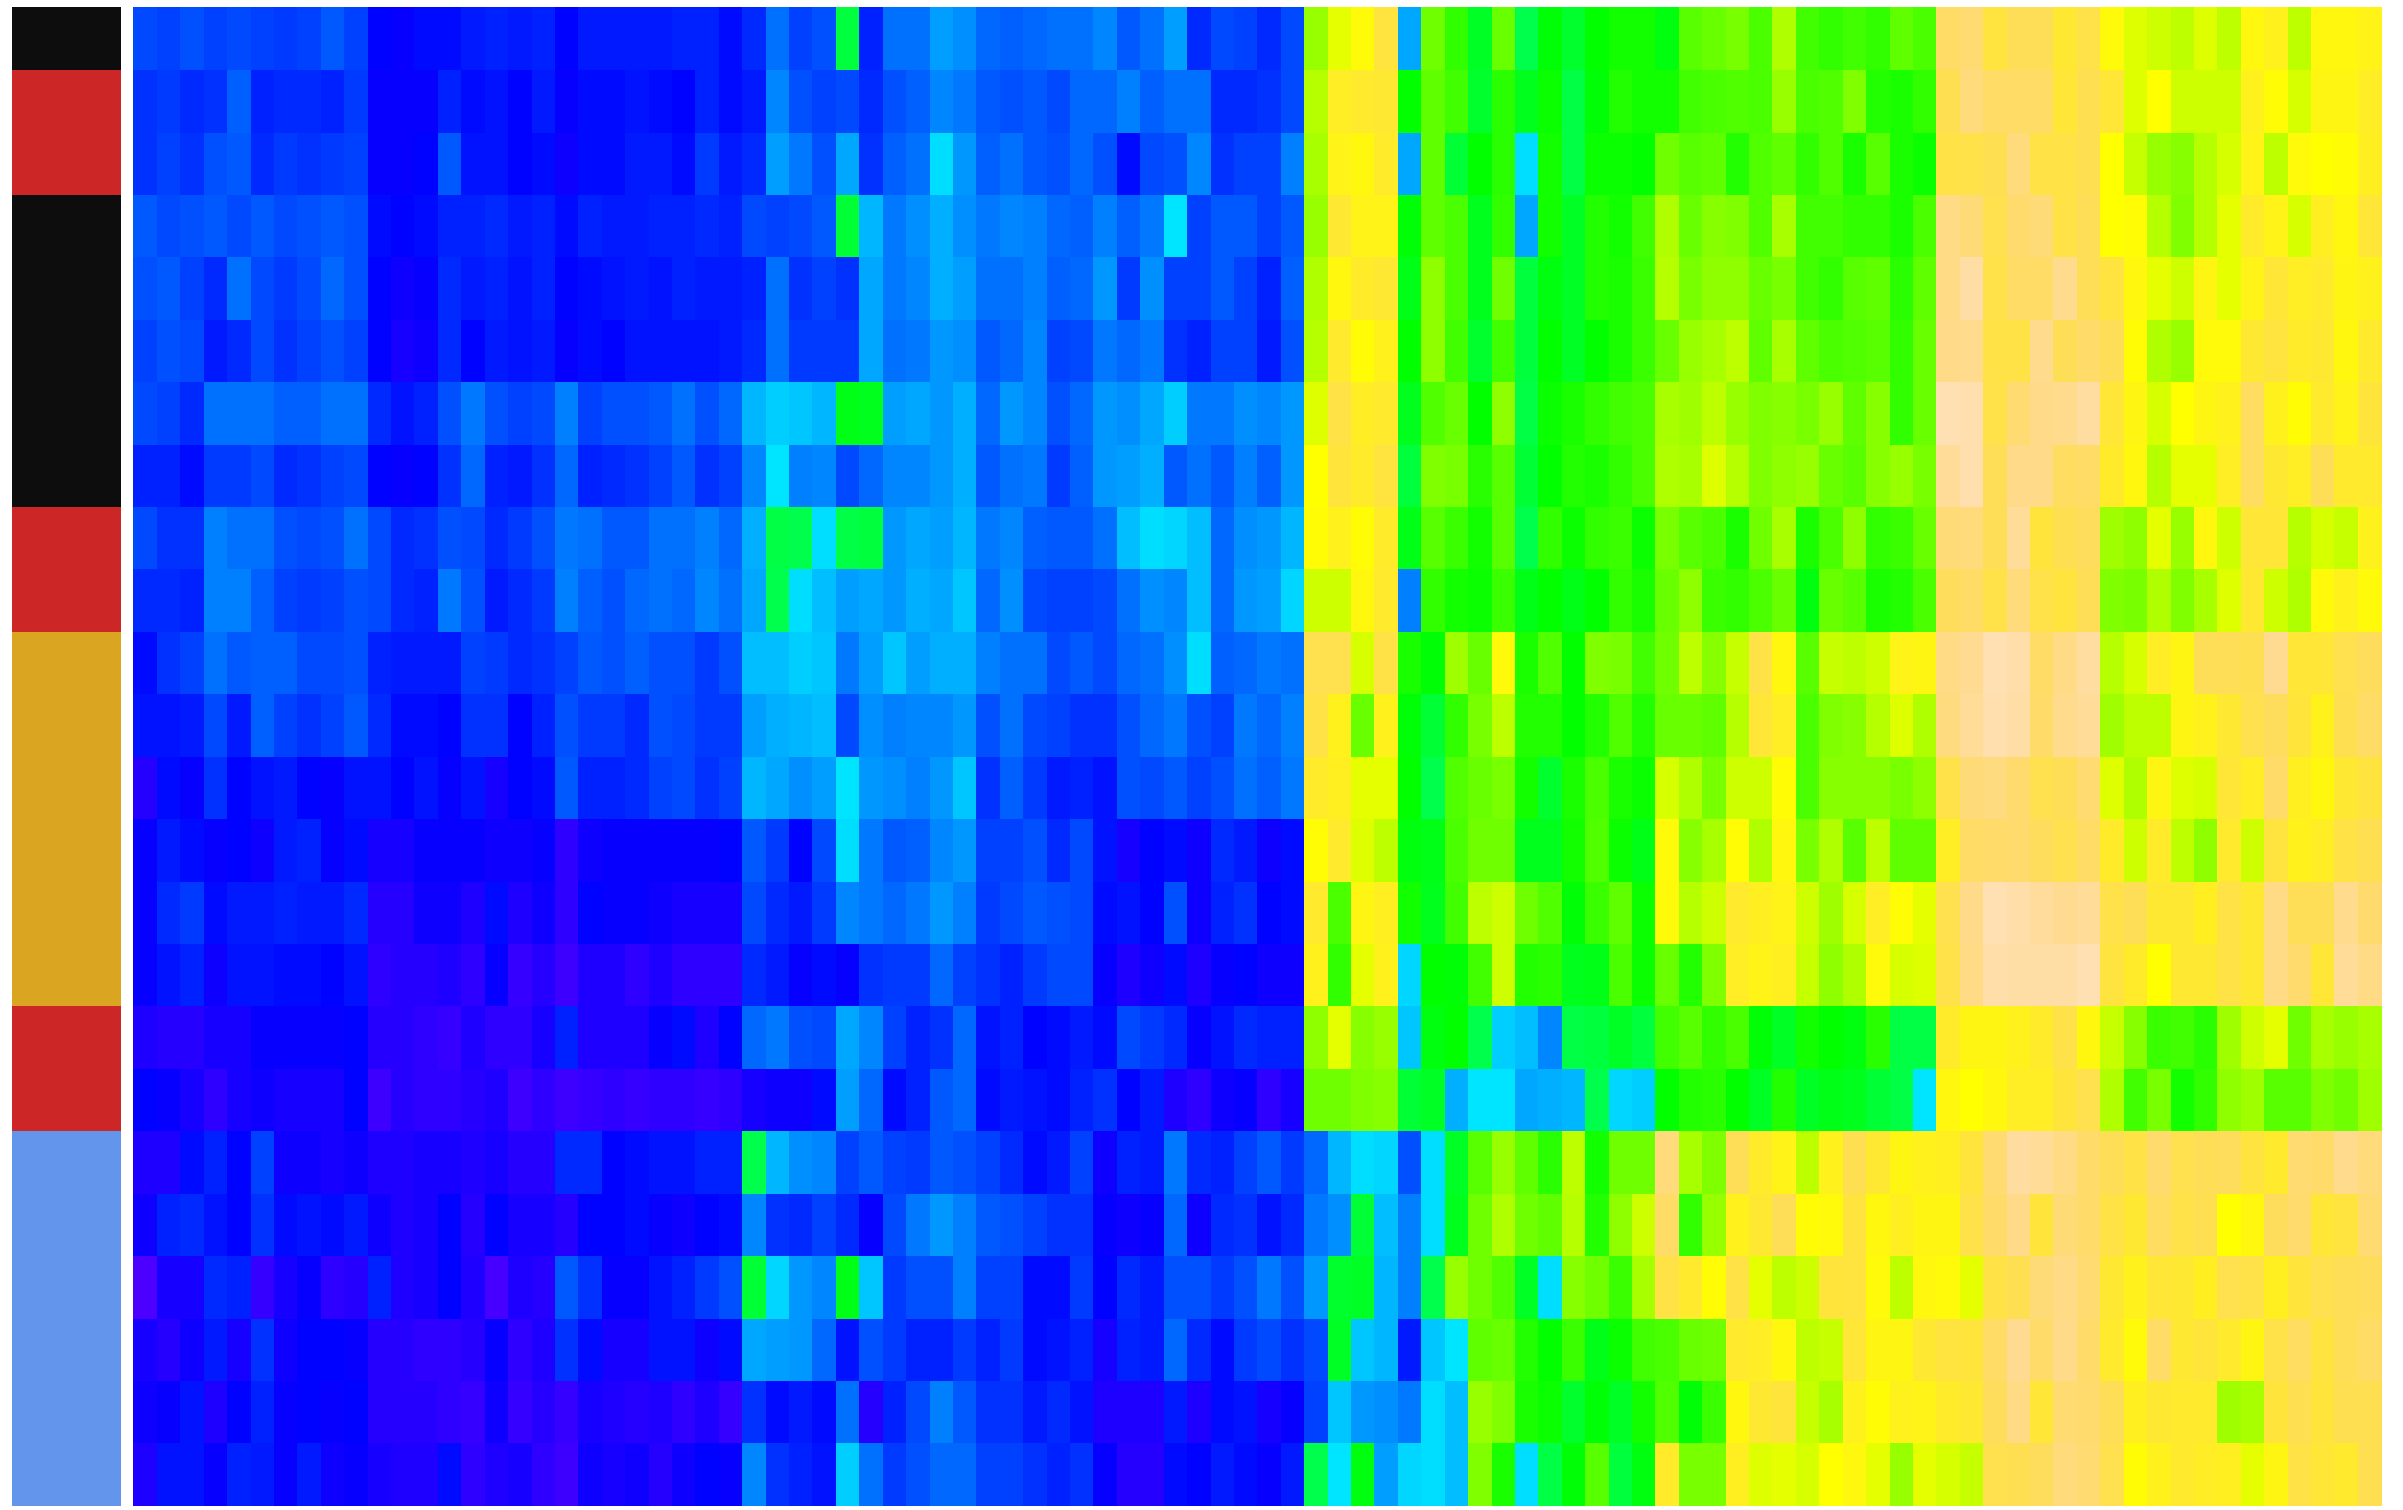

H03 (L-Lysine)  
H10 (D-Galactonic Acid)  
H11 (D-Phenylethylamine)  
D08 (D-Lactose)  
F11 (D-Galactose)  
D07 (Mannosic Acid)  
H07 (Glucosamine)  
H03 (D-Fucose)  
H03 (D-Hydroxy-Phenylethylamine)  
H02 (D-Hydroxy-Phenylethylamine)  
E09 (Mannose)  
F10 (Glyceric Acid)  
F03 (Glycolic Acid)  
D08 (N-Acetyl-L-Proline)  
F04 (D-Threonine)  
H04 (Tyramine)  
F03 (Propylamine)  
D02 (Threoninic Acid)  
D08 (L-Rhamnose)  
E11 (2-Deoxy-D-Arabinose)  
E04 (D-Fucose-4-Phosphate)  
E03 (D-Glucose-1-Phosphate)  
E08 (D-Hydroxy-Quinic Acid-3-Lactone)  
D04 (L,2-Propanediol)  
E09 (D-Methyl-D-Glucoside)  
D06 (D-Methyl-D-Galactoside)  
A10 (D-Threosul)  
B10 (Sodium Formate)  
A10 (D-Threosul)  
C12 (Thymine)  
E10 (Mannoside)  
E10 (Mannoside)  
C10 (D-Adonitol)  
F01 (D-xylo-Hex)  
C01 (D-Glucose-4-Phosphate)  
A01 (Nagelovonin)  
B01 (D-Serine)  
B02 (D-Sorbitol)  
H03 (L-Galactonic Acid-3-Lactone)  
G11 (D-Malic Acid)  
A12 (Dulcitol)  
G04 (L-Threonine)  
D07 (D-xylo-Butyric Acid)  
E07 (D-Hydroxy-Butyric Acid)  
C11 (D-Melibiose)  
D11 (Sorbitol)  
D01 (D-Acetic Acid)  
B04 (L-Fucose)  
D10 (Lactulose)  
B04 (D-Glucosamine Acid)  
D02 (D-Glucosamine Acid)  
D08 (D-Fruktan 20)  
D08 (D-Fruktan 40)  
E08 (D-Fruktan 80)  
H11 (D-N-Ph)  
H12 (D-Ribofuranose)  
B03 (D-Glucose)  
R07 (D-Glucose Acid)  
G01 (D-Galactose)  
G02 (D-Galactonic Acid-3-Lactone)  
G10 (Methyl Pyruvate)  
B04 (D-Xylose)  
F06 (D-Ferulic-Succinic Acid)  
D03 (D-Glucosamine Acid)  
D04 (D-Ribose)  
D08 (Acetic Acid)  
A03 (N-Acetyl-D-Glucosamine)  
B09 (L-Lactic Acid)  
A03 (D-Galactoside)  
D05 (L-Asparagine)  
H03 (D-Ferulic Acid)  
A11 (D-Mannoside)  
C07 (D-Fructose)  
D12 (Dulcitol)  
A09 (D-Alanine)  
G09 (N-Acetyl-D-Glucosamine)  
E12 (Methionine)  
F02 (Citric Acid)  
F08 (Mucic Acid)  
G03 (L-Serine)  
G12 (L-Malic Acid)  
A04 (D-Saccharic Acid)  
E07 (L-Glutamine)  
D01 (L-Asparagine)  
B12 (L-Glutamic Acid)  
A08 (L-Proline)  
D06 (D-Malic-Glutamic Acid)  
B11 (D-Mannitol)  
F12 (Sorbitol)  
A01 (Succinic Acid)  
A02 (L-Ascorbic Acid)  
F05 (Formic Acid)  
C08 (D-Glucose)  
A07 (L-Aspartic Acid)  
B06 (D-Glucosamine Acid)  
C05 (D-L-Malic Acid)

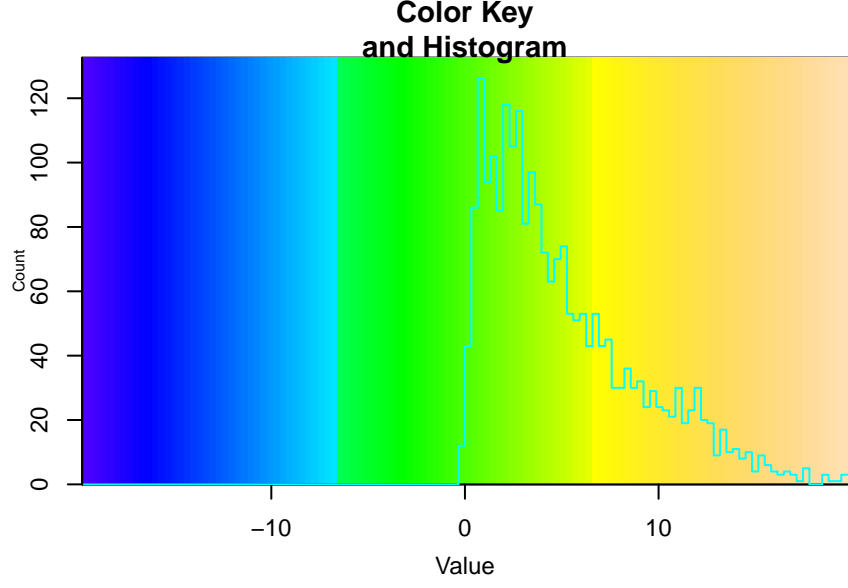

PM01 strain 2 -mu

- Blue light
- Dark
- Red light
- White light

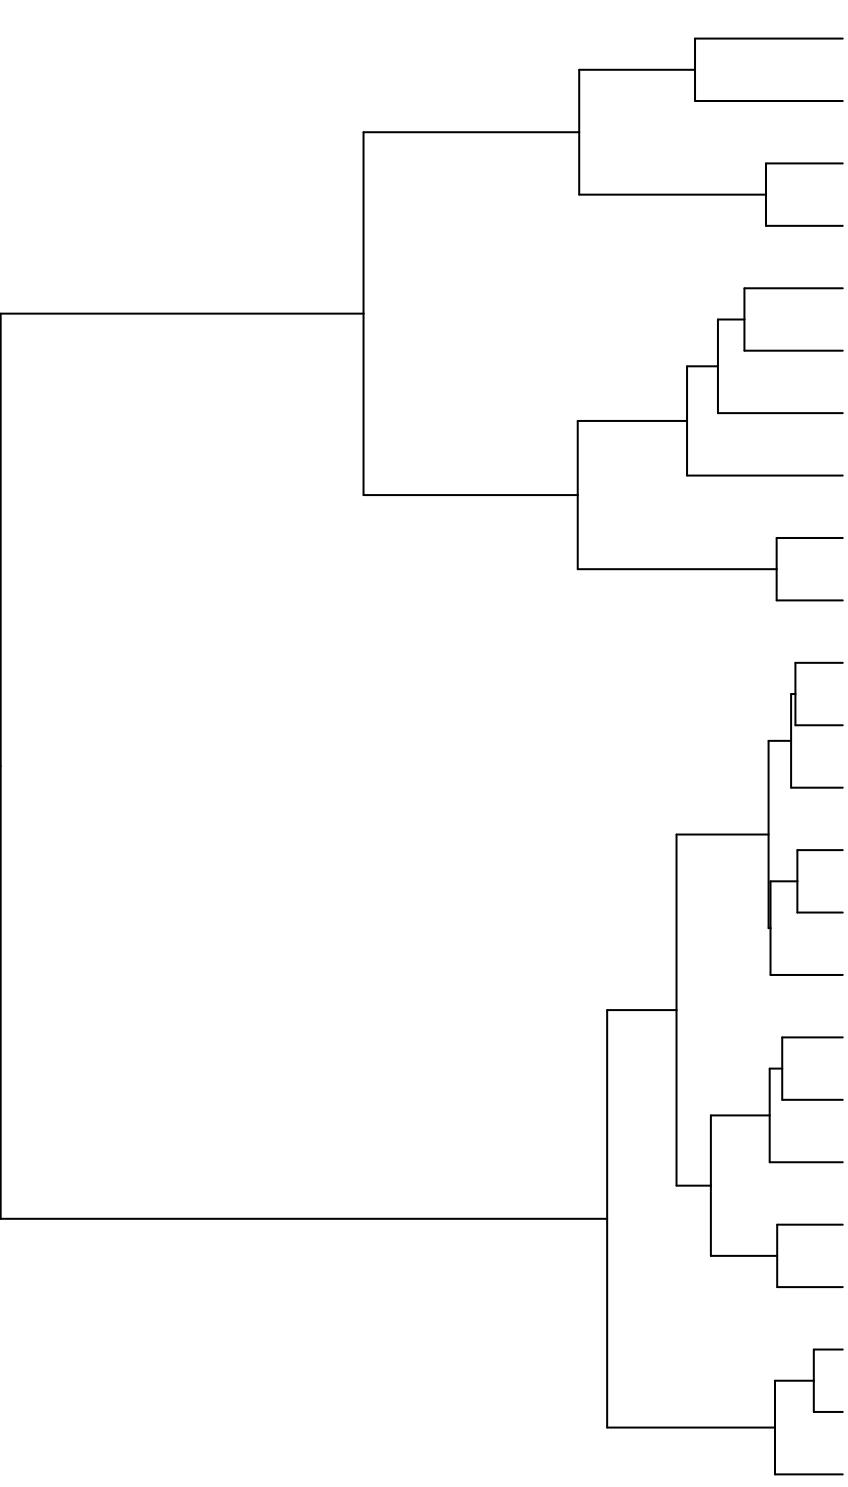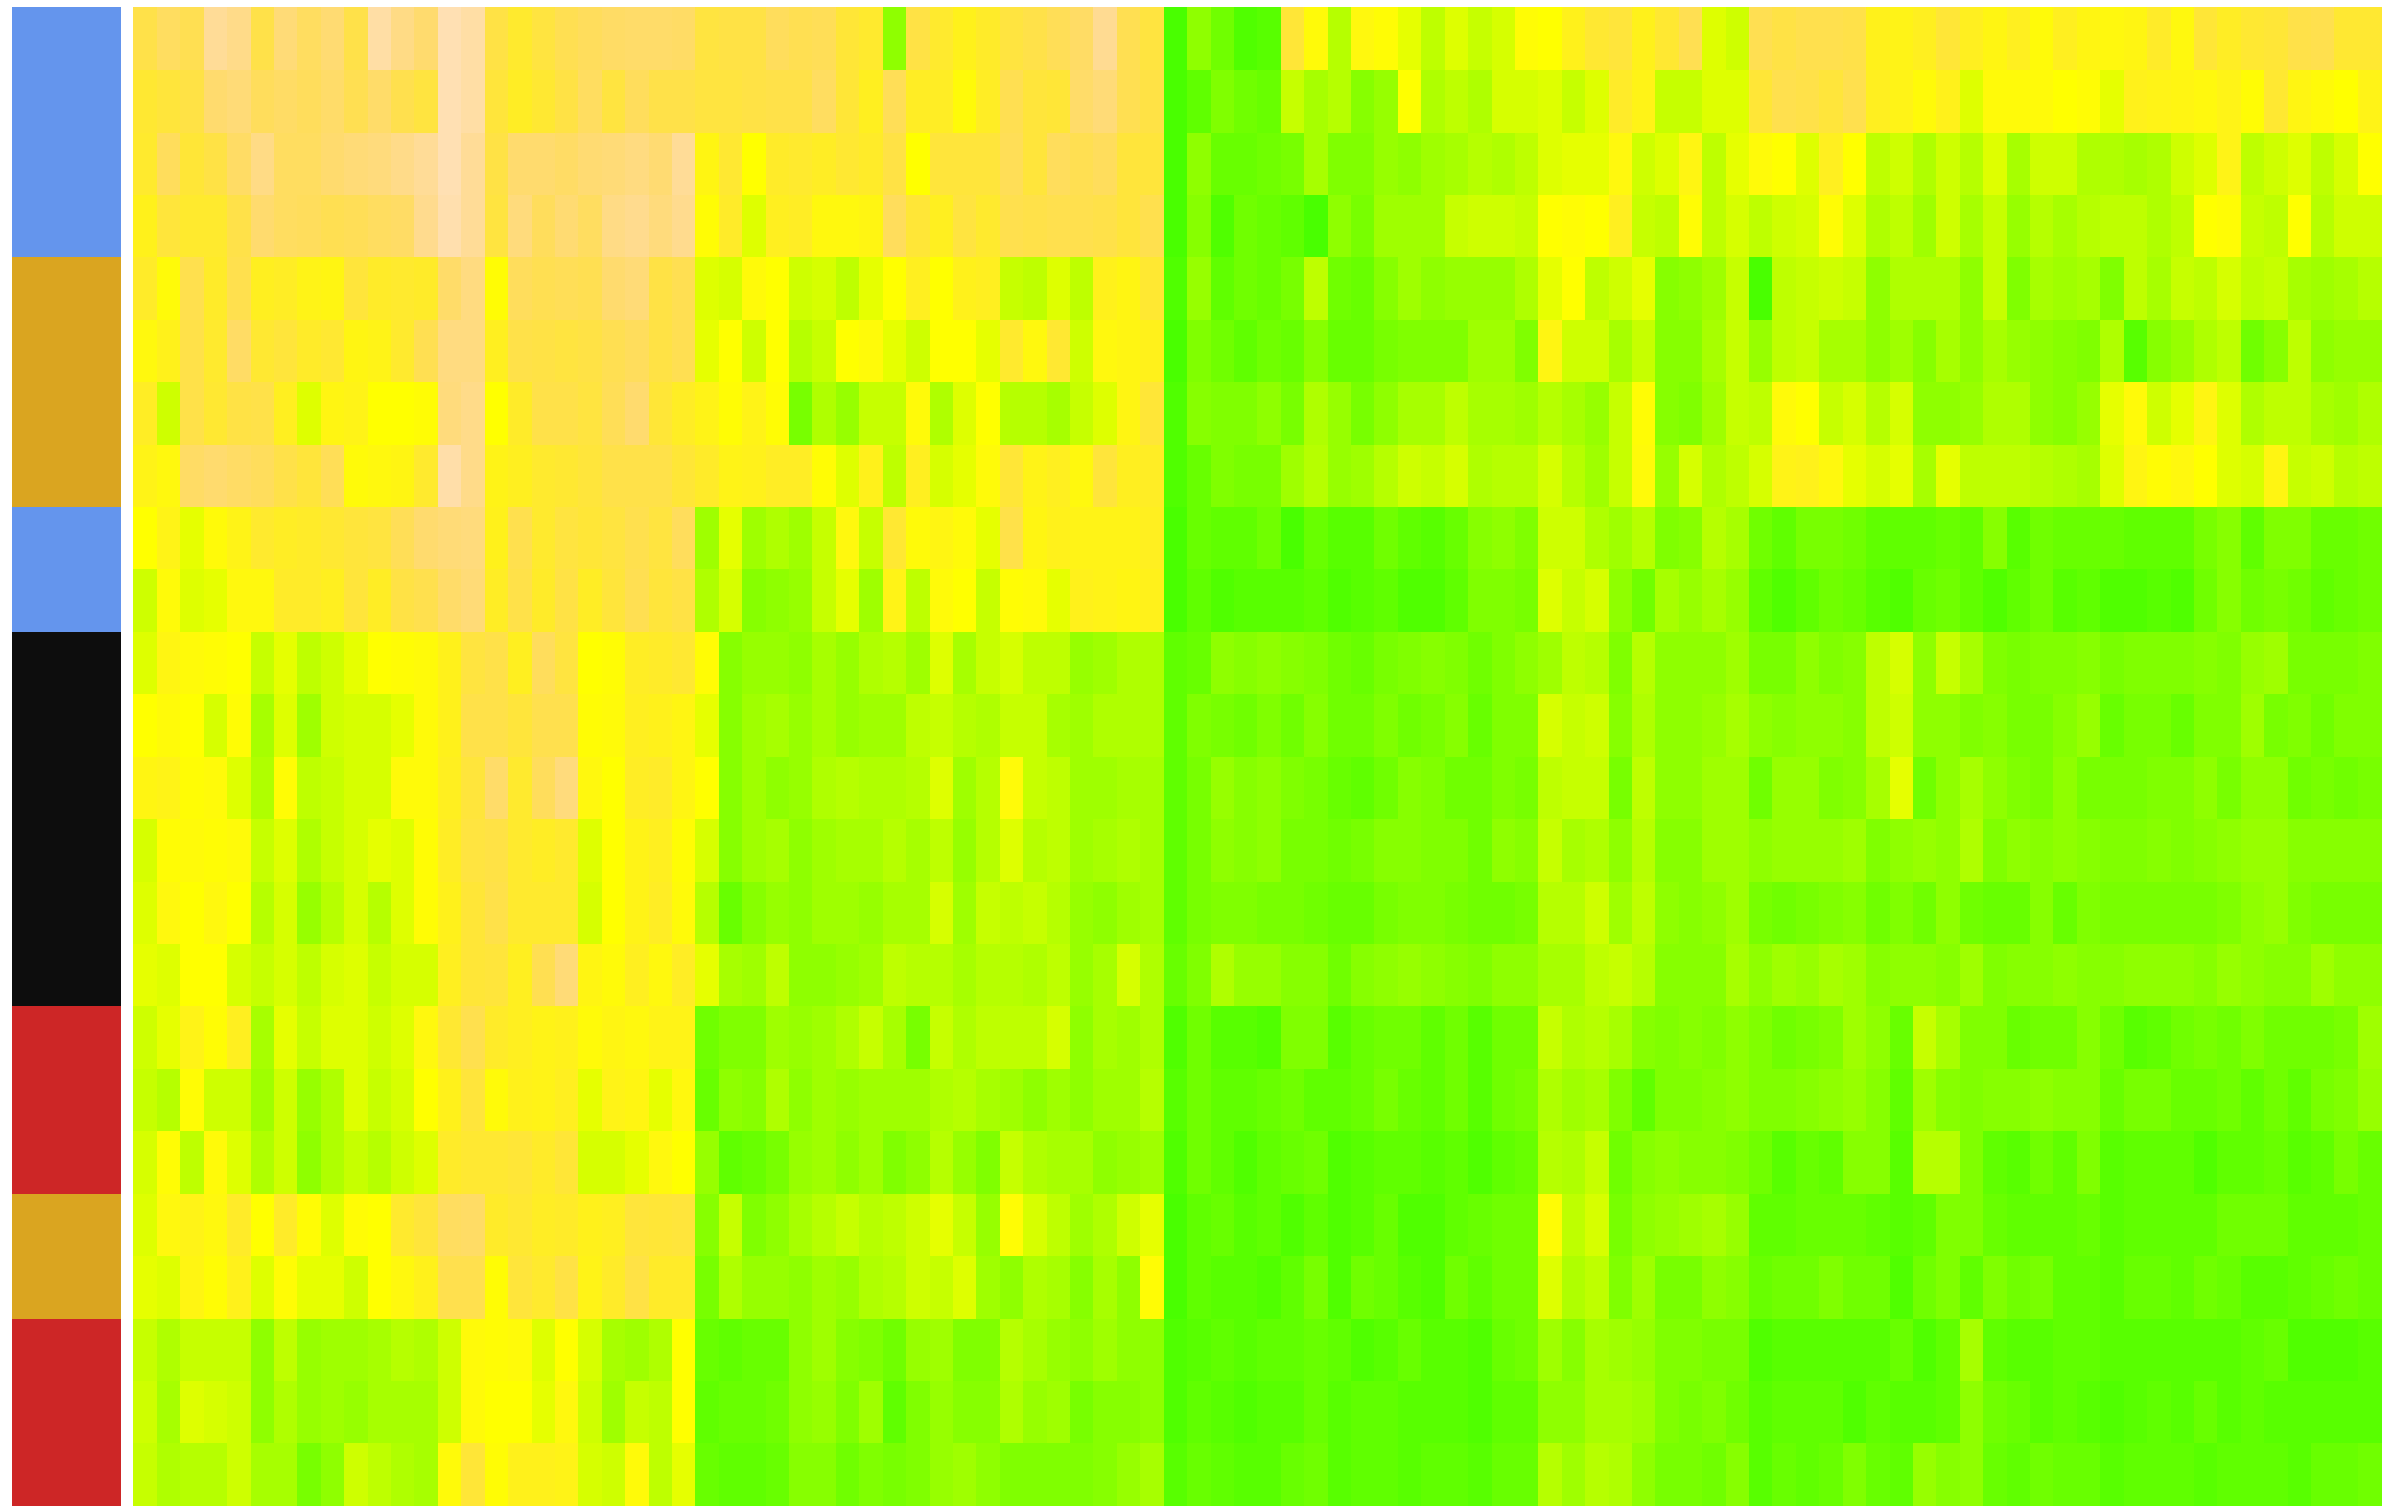

D02 (m-Tartronic Acid)  
 B09 (L-Lactic Acid)  
 E08 (Hexan-2-ol)  
 C08 (Hexan-2-ol)  
 D06 (Hexan-2-ol)  
 H03 (Pantoic Acid)  
 A01 (Succinic Acid)  
 A02 (D-Mannitol)  
 A07 (L-Aspartic Acid)  
 F12 (Hexan-2-ol)  
 C08 (Hexan-2-ol)  
 C09 (D-Glucose)  
 B06 (D-Gluconic Acid)  
 C02 (D-L-Malic Acid)  
 G12 (L-Malic Acid)  
 A04 (D-Succinic Acid)  
 G03 (L-Serine)  
 F08 (Mucic Acid)  
 F02 (Citric Acid)  
 D01 (L-Asparagine)  
 F06 (Barbituric Acid)  
 F05 (Formic Acid)  
 D08 (D-Keto-Glutaric Acid)  
 E07 (L-Glutamine)  
 H02 (L-Glutamic Acid- $\beta$ -Lactone)  
 B10 (Sorbitol Formate)  
 F01 (D-xylose)  
 B07 (D,L-2-Oxoglutaric Phosphate)  
 D03 (D-Gluconic Acid)  
 A03 (N-Acetyl-D-Glucosamine)  
 A11 (D-Mannitol)  
 B01 (Glycerol)  
 G07 (Ascorbic Acid)  
 G01 (D-xylose)  
 B11 (D-Mannitol)  
 G08 (As-Citric)  
 G09 (Meso-Methyl Succinate)  
 B12 (L-Glutamic Acid)  
 A05 (D-Galactonic Acid)  
 A06 (L-Proline)  
 D12 (Uric Acid)  
 C07 (D-Fructose)  
 E11 (Adonitol)  
 D05 (L-Mannitol)  
 H04 (L-Xylose)  
 D07 (D-xedo-Butyric Acid)  
 H02 (D-Hydroxy-Phenylacetic Acid)  
 H04 (Tyramine)  
 H03 (m-Hydroxy-Phenylacetic Acid)  
 C11 (Thymine)  
 E07 (D-Hydroxy-Butyric Acid)  
 F10 (Oxalic Acid)  
 C06 (L-Asparagine)  
 H08 (D-Hydroxy-Quinic Acid- $\beta$ -Lactone)  
 H07 (Glucuronamide)  
 G02 (Thiosulfuric Acid)  
 F04 (D-Threonine)  
 H11 (D-Phenylethylamine)  
 G11 (D-Malic Acid)  
 G04 (L-Threonine)  
 R07 (Pyruvic Acid)  
 H12 (Ethanolamine)  
 A02 (L-Ascorbic Acid)  
 E10 (Malonic Acid)  
 H01 (D-Xylose)  
 G04 (D-Isovaleric Acid)  
 B04 (D-Xylose)  
 G10 (Methyl Pyruvate)  
 G09 (D-Methyl-D-Glucoside)  
 C01 (D-Gluconic Acid)  
 D02 (D-Aspartic Acid)  
 D06 (D-Methyl-D-Glucoside)  
 D08 (N-Acetyl-D-Mannosamine)  
 B08 (D-Gluconic Acid)  
 H03 (D-Galactonic Acid)  
 D11 (Glycerol)  
 A10 (D-Threonine)  
 C10 (D-Malic Acid)  
 B01 (D-Serine)  
 B04 (L-Proline)  
 C11 (D-Melibiose)  
 B02 (D-Sorbitol)  
 F11 (D-Cellobiose)  
 F03 (Oxalic Acid)  
 E03 (D-Glucose-1-Phosphate)  
 D04 (L-2-Propanediol)  
 F03 (glycerol)  
 A01 (Negative Control)  
 E04 (D-Fructose-6-Phosphate)  
 A12 (Galactose)  
 H05 (D-Proline)  
 E09 (Alanine)  
 D10 (Lactulose)  
 D09 (D-Lactulose)

b 6  
 b 5  
 b 1  
 b 2  
 w 2  
 w 1  
 w 6  
 w 5  
 b 3  
 b 4  
 D 1  
 D 2  
 D 3  
 D 6  
 D 4  
 D 5  
 r 1  
 r 2  
 r 3  
 w 3  
 w 4  
 r 5  
 r 6  
 r 4

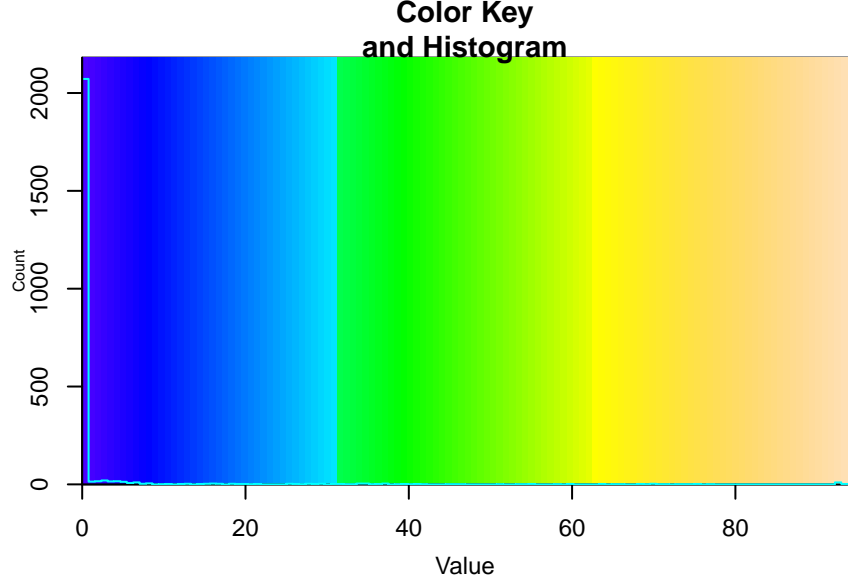

### PM01 strain 2 -lambda

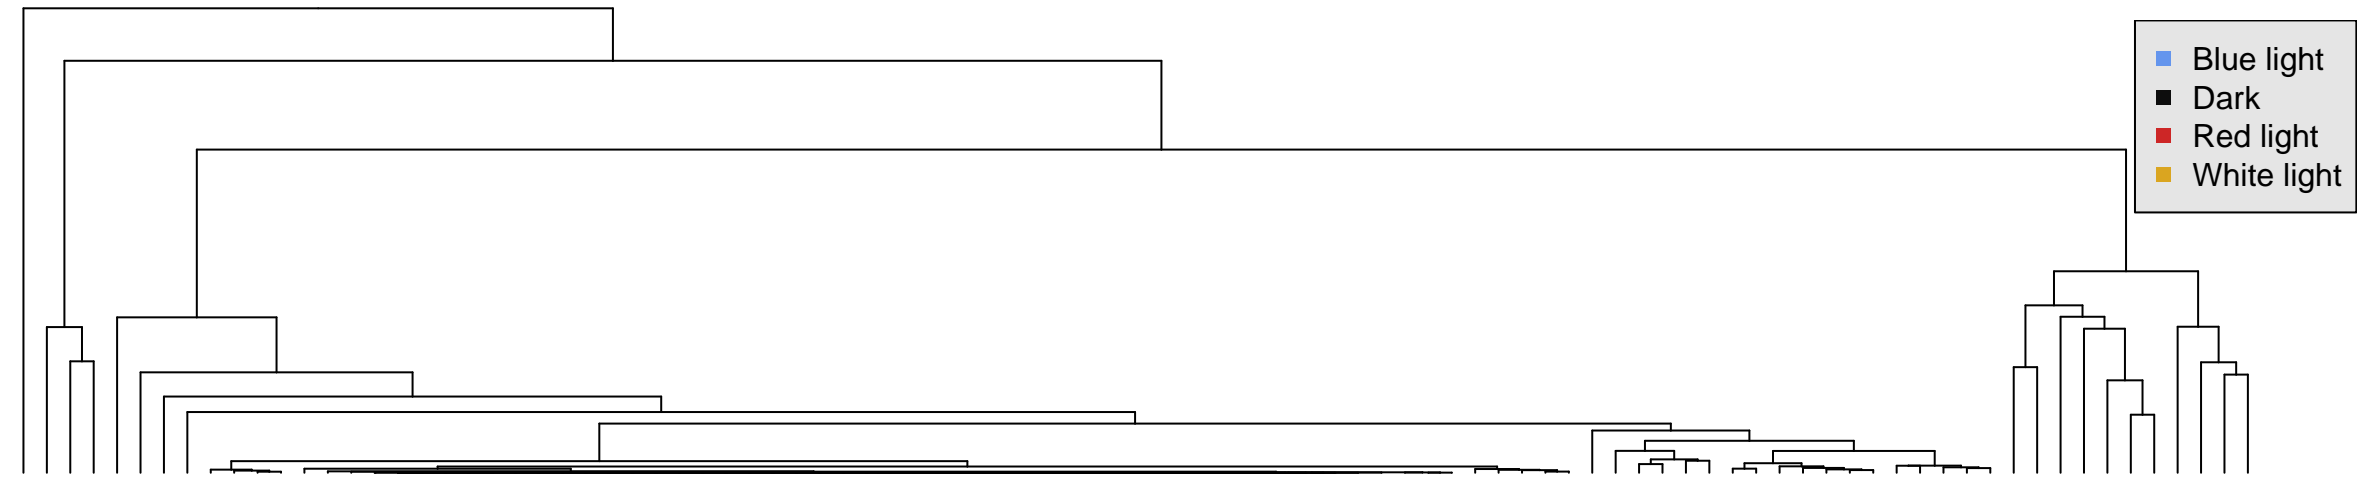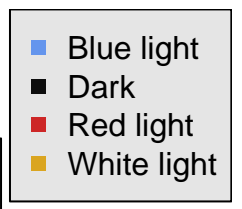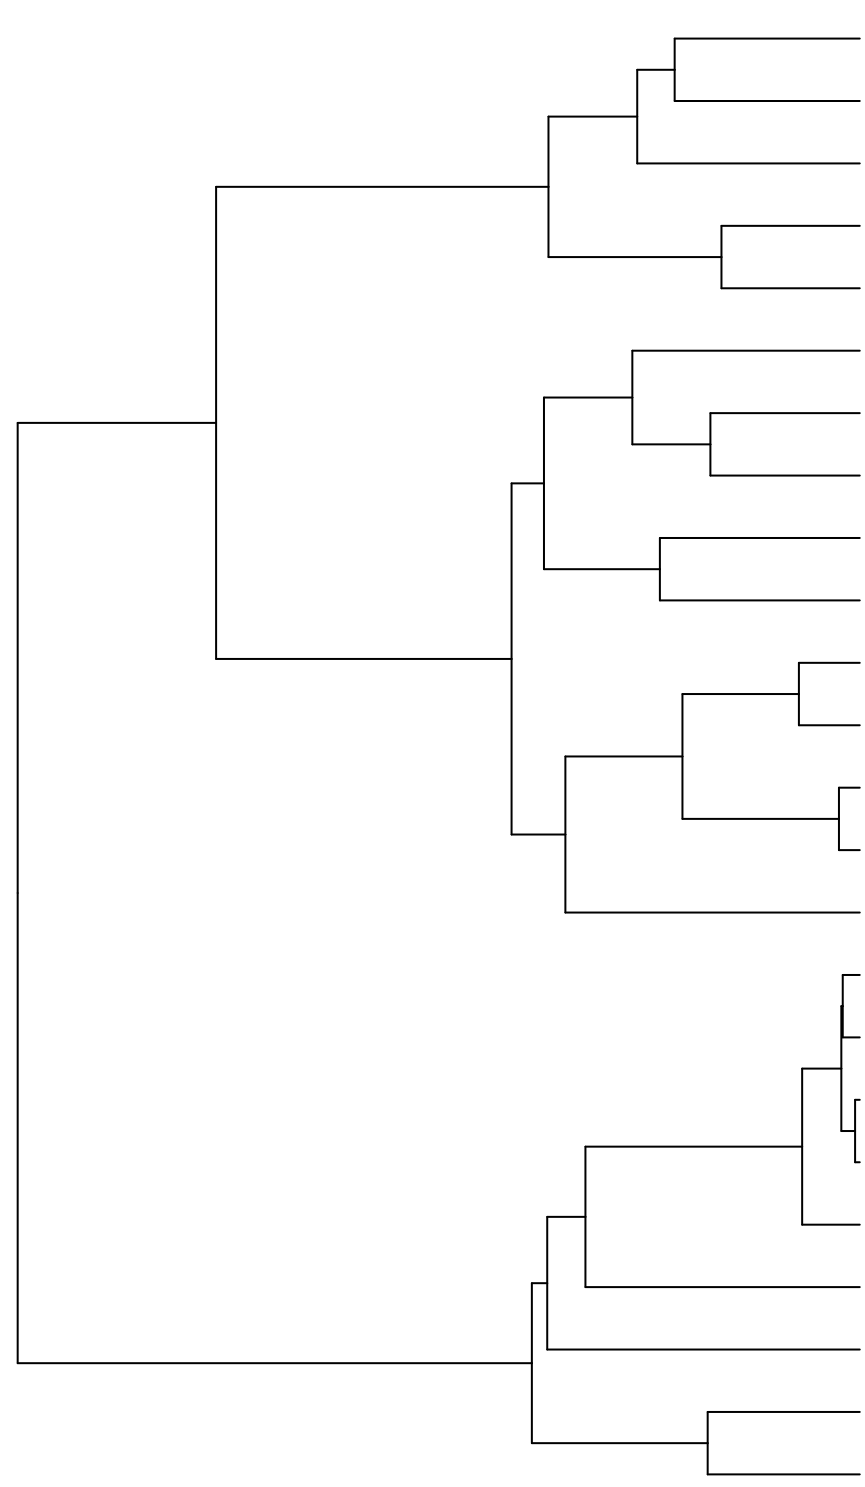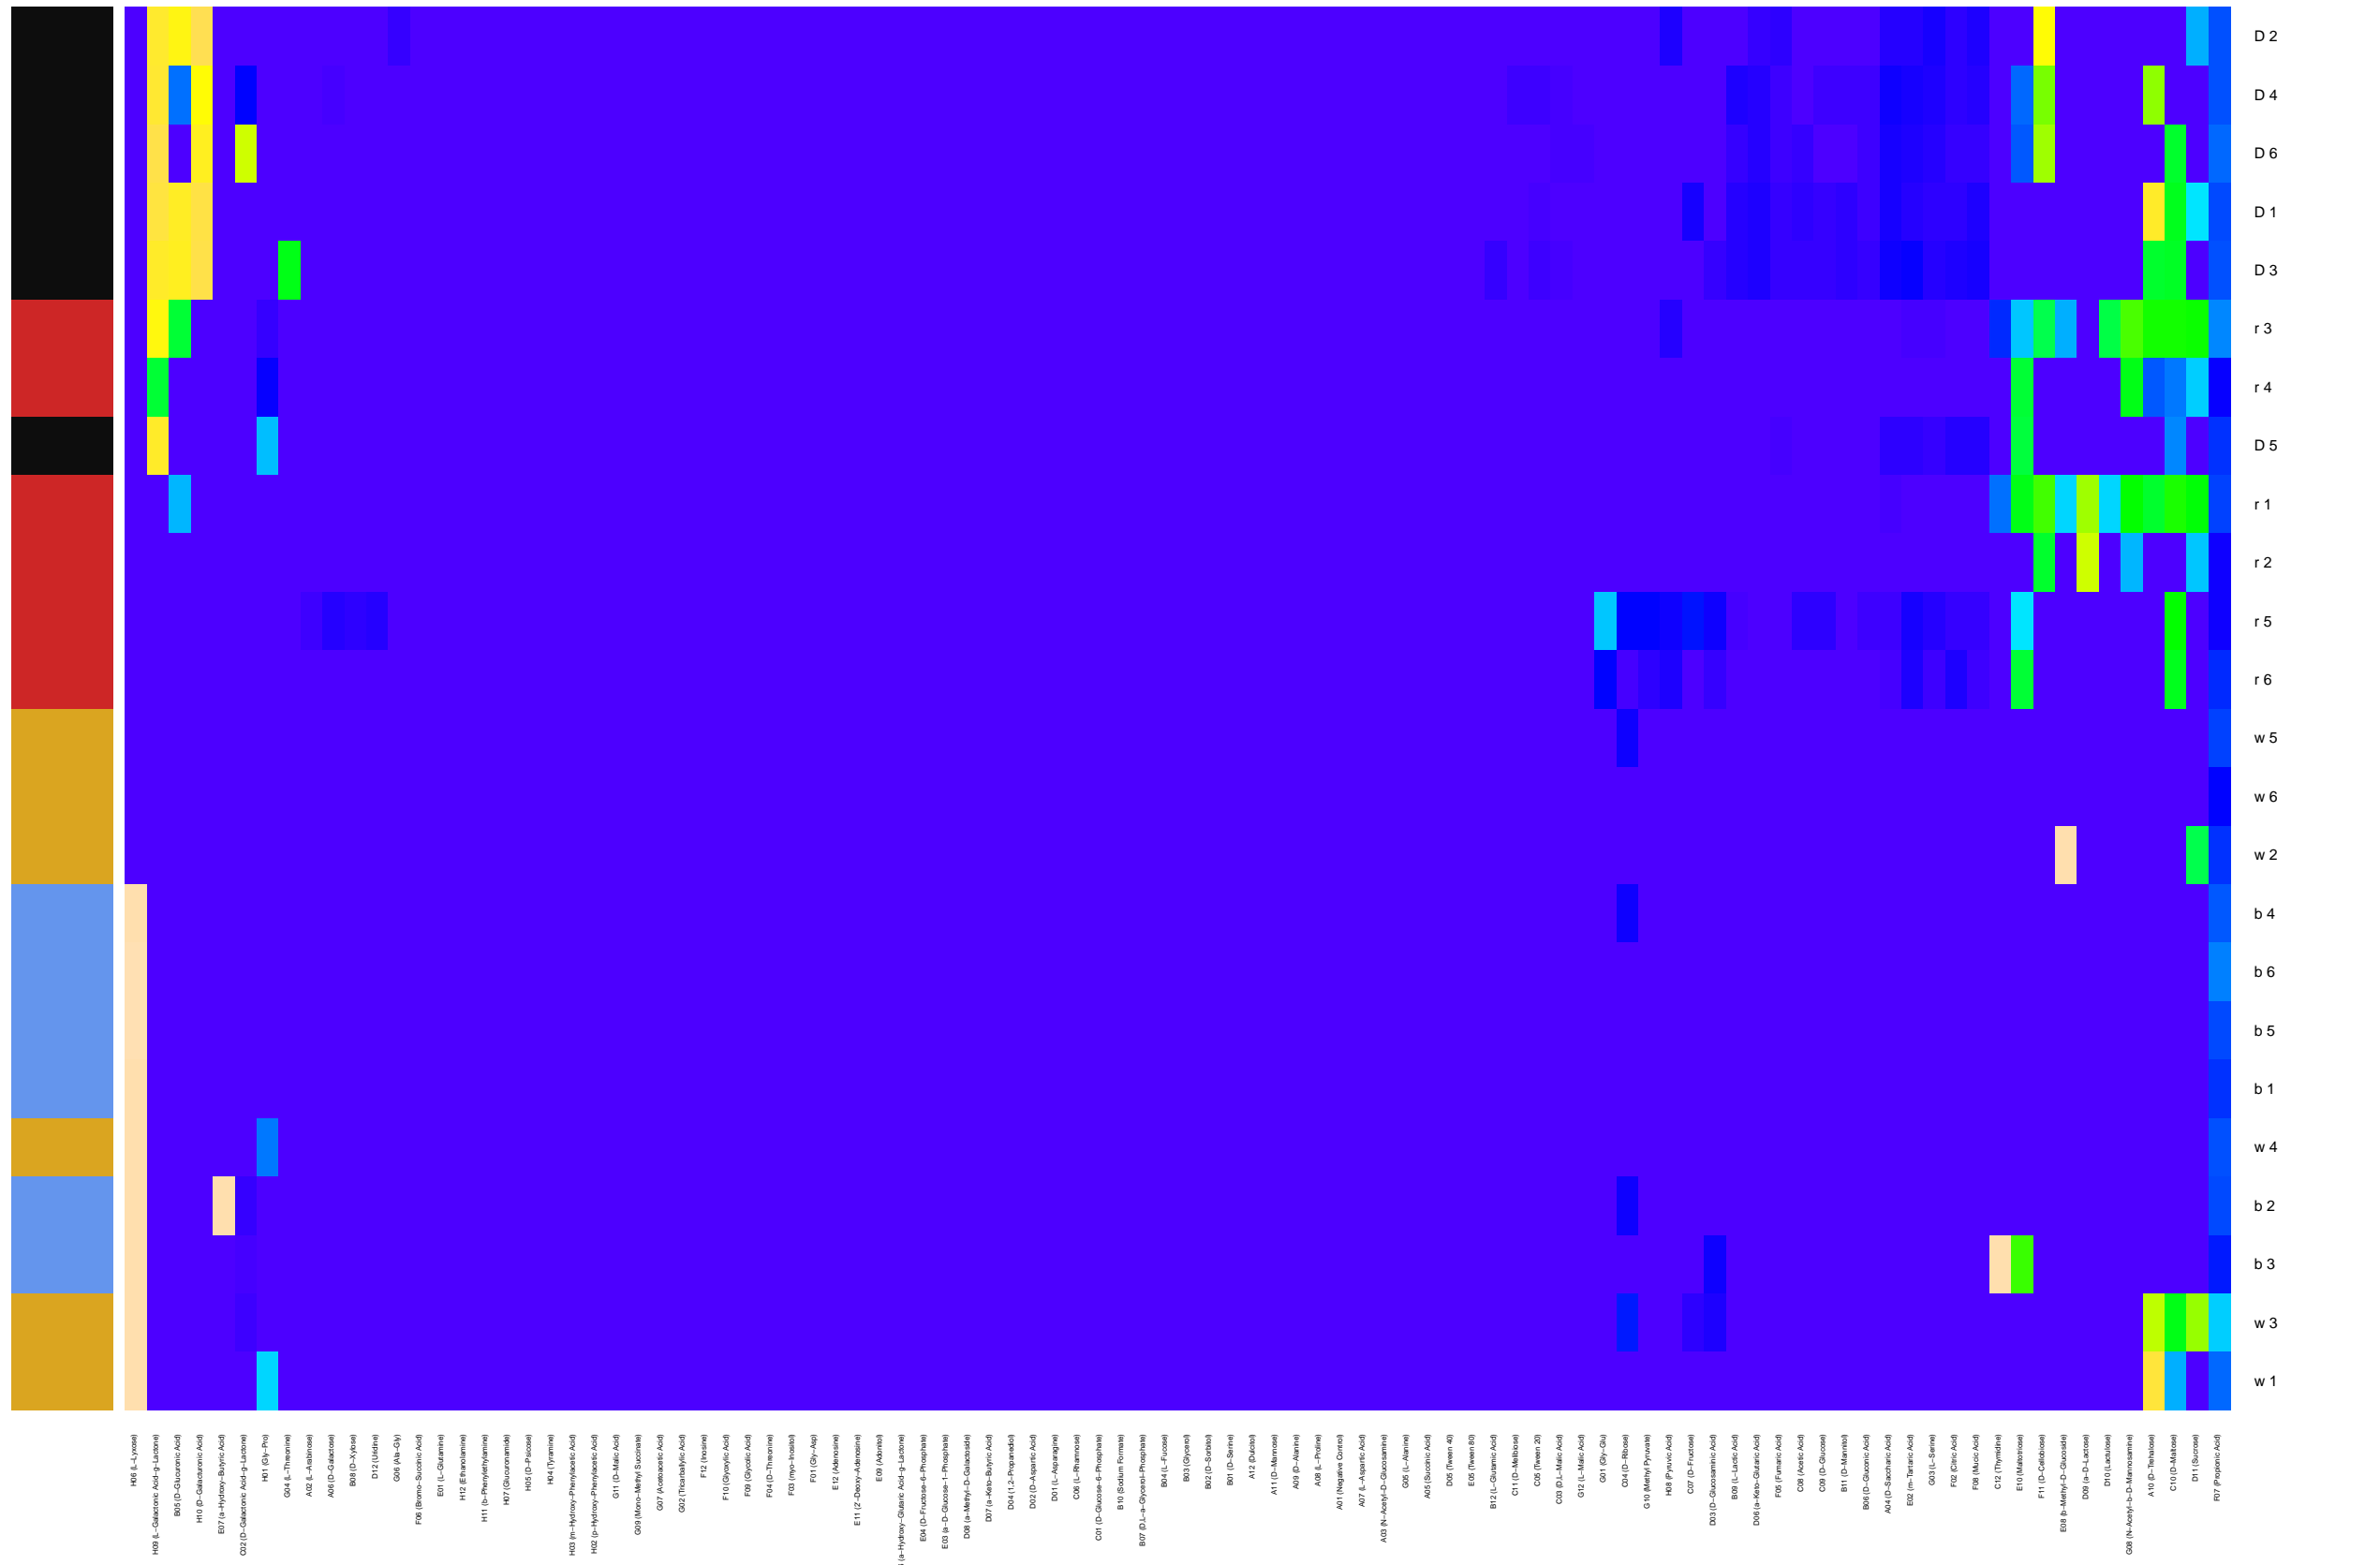

Color Key and Histogram

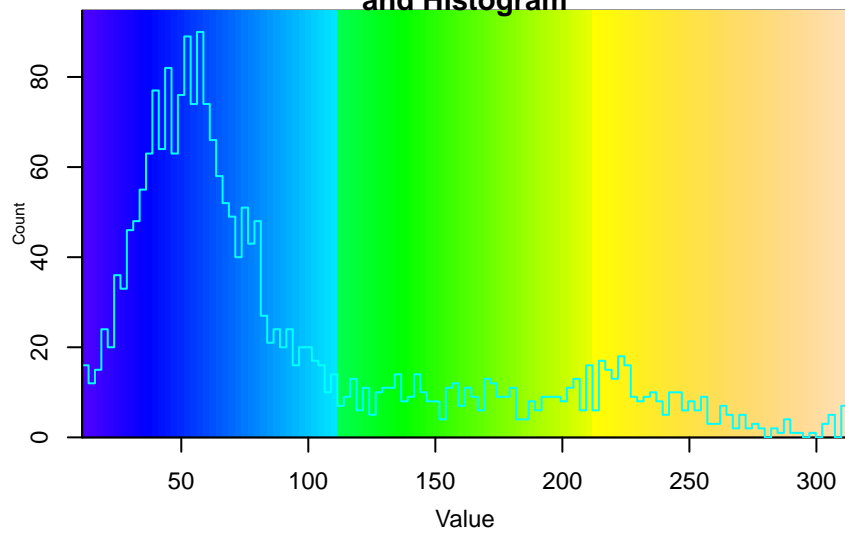

PM2.5 strain 2 -A

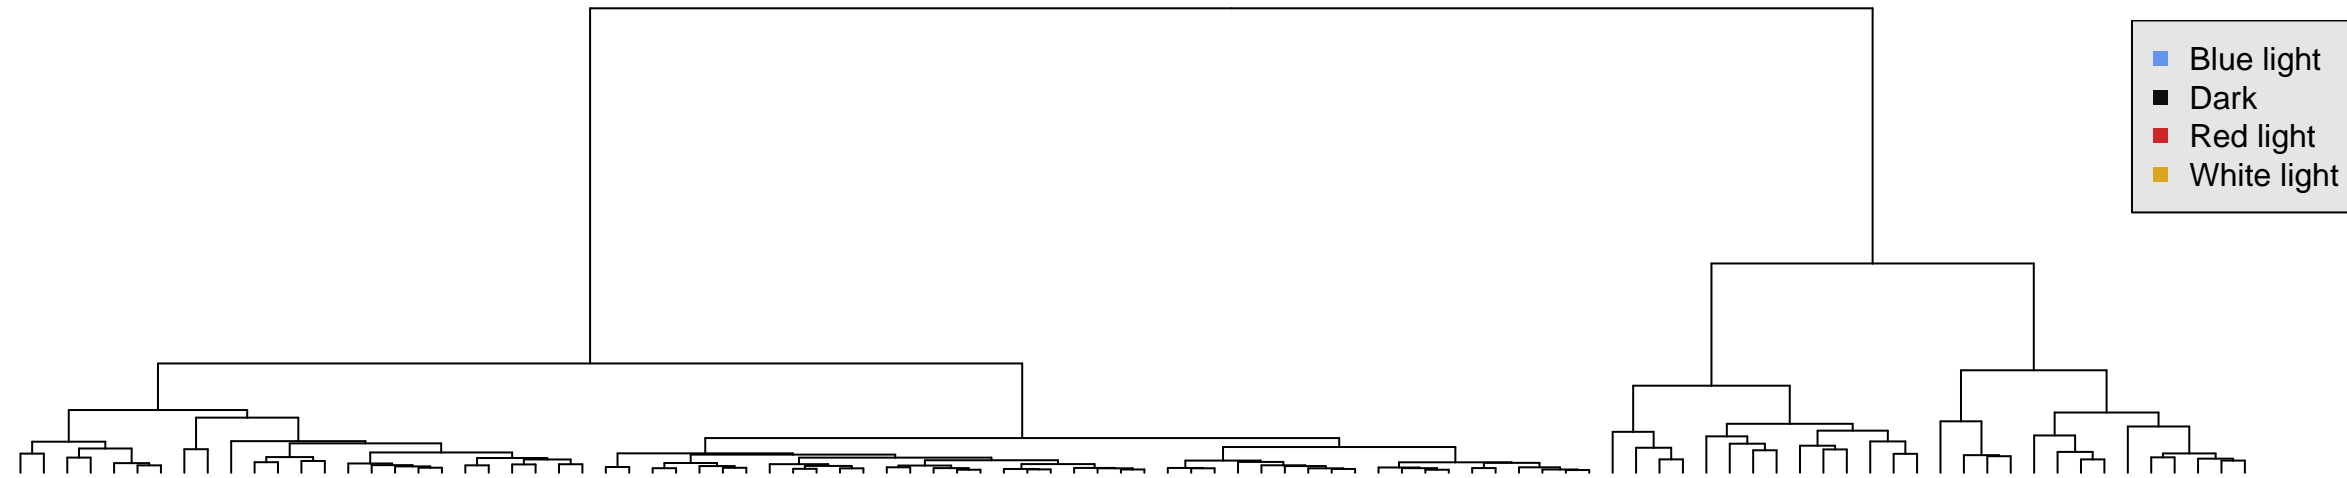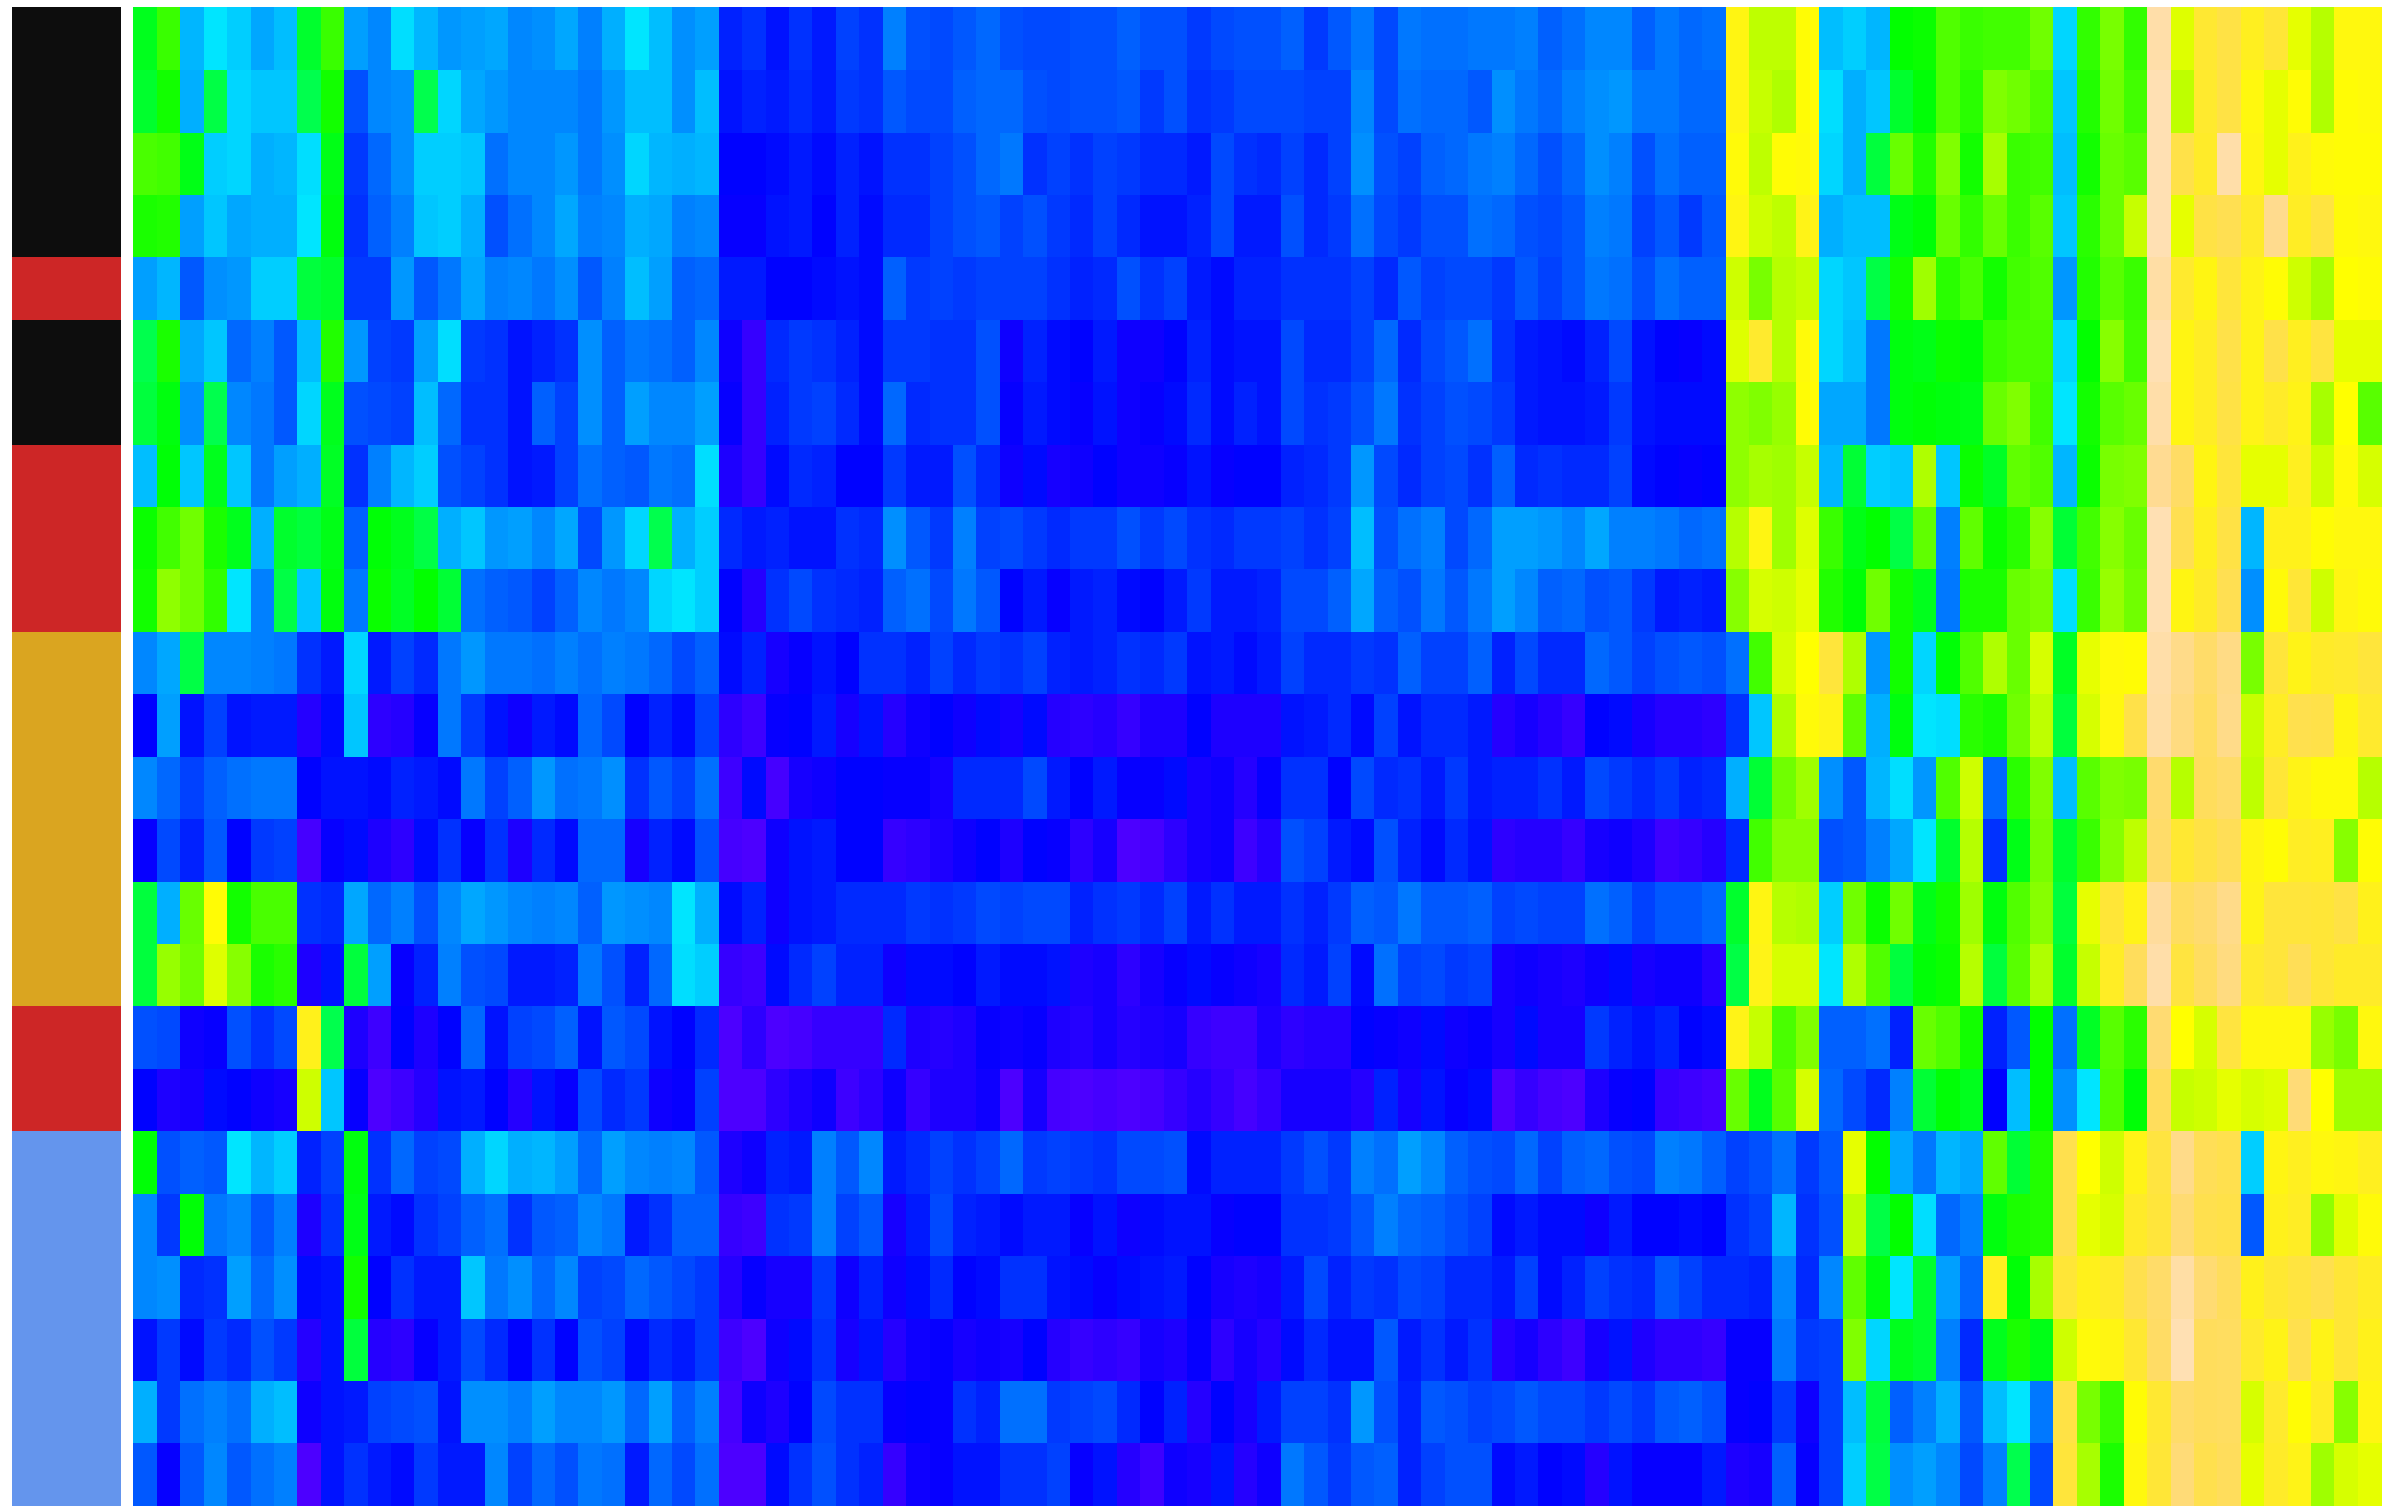

D3  
D6  
D5  
D2  
r4  
D1  
D4  
r3  
r2  
r1  
w4  
w3  
w6  
w5  
w2  
w1  
r6  
r5  
b2  
b1  
b4  
b3  
b6  
b5

A10 (Luminol)  
B88 (Aibutyl)  
D02 (D-Sorbitol)  
D11 (D-Ribitol)  
C12 (Phenol)  
A03 (n-Octadecanoic)  
A08 (Oleic)  
E07 (n-Heptyl-2-methyl-3-oxo-  
F03 (Butyric Acid)  
O06 (L-Ascorbic)  
D08 (Stearic Acid)  
O09 (n-Methyl-D-Glucosamine)  
C04 (D-Malic Acid)  
G11 (L-Lyxose)  
-O-6-O-Galactopyranosyl-D-Glucosamine)  
E12 (S-Weib-D-Glucosamine)  
B11 (D-Fucose)  
A09 (Inositol)  
A11 (Mannitol)  
A01 (Negative Control)  
A02 (D-Glucitol-2-Amino-2,6-Di-  
D12 (Butyric Acid)  
B04 (Myristic)  
C01 (n-Octadecanoic)  
G07 (L-Ascorbic)  
E06 (n-Heptyl-2-methyl-3-oxo-  
N06 (Burgundy (red))  
H10 (2,3-Bisphenoxy)  
H11 (2,3-Bisphenoxy)  
F03 (Malonic Acid)  
F11 (D-Tartronic Acid)  
E10 (n-Heptadecanoic)  
F04 (Suberic Acid)  
G12 (L-Ascorbic)  
C03 (D-Lactulose)  
G03 (L-Glucose)  
D06 (D-Tartronic)  
B03 (D-D-Allose)  
D04 (L-Sorbitol)  
D03 (Xylose)  
D00 (Sedimentation)  
C06 (D-Glycerol-3-Phosphate)  
D09 (n-Aspartic-D-Glutamic)  
E11 (Biotinic Acid)  
H07 (DL-Ascorbic)  
F04 (Dicarboxylic)  
F07 (D-Ribono-1,4-Lactone)  
E09 (n-Heptyl-2-methyl-3-oxo-  
G01 (Acetic)  
F03 (D-Glucosamine)  
G05 (Oxalic)  
D07 (Inositol)  
H12 (n-Heptyl-2-methyl-3-oxo-  
F12 (L-Tartronic)  
F10 (D-Glucosamine)  
G02 (L-Ascorbic)  
B02 (n-Heptyl-2-methyl-3-oxo-  
C05 (n-Methyl-D-Glucosamine)  
O09 (n-Methyl-D-Glucosamine)  
B09 (n-Heptyl-2-methyl-3-oxo-  
D11 (D-Arabinose)  
B05 (D-Arabinose)  
C10 (n-Methyl-D-Glucosamine)  
B07 (L-Ascorbic)  
E02 (Citric Acid)  
E03 (Citric Acid)  
H01 (L-Valine)  
G09 (L-Ascorbic)  
E01 (Citric Acid)  
A12 (Phenol)  
A05 (D-glucose)  
H02 (DL-Carnitine)  
H02 (DL-Phenylalanine)  
B01 (n-Aspartic-D-Glutamic)  
F02 (Malonic Acid)  
H01 (L-Ascorbic)  
D11 (L-Leucine)  
H09 (D-Phenylalanine)  
E01 (D-Carnitine)  
E05 (D-Glucosamine)  
B06 (D-Arabinose)  
G08 (n-Heptyl-2-methyl-3-oxo-  
F08 (Pantoic)  
G04 (L-Ascorbic)  
H03 (D-Phenylalanine)  
A07 (Glycerol)  
O03 (n-Heptyl-2-methyl-3-oxo-  
D10 (n-Heptyl-2-methyl-3-oxo-  
F05 (D-glucose)  
F10 (D-Lactic Acid Methyl Ester)  
E08 (n-Heptyl-2-methyl-3-oxo-)

Color Key and Histogram

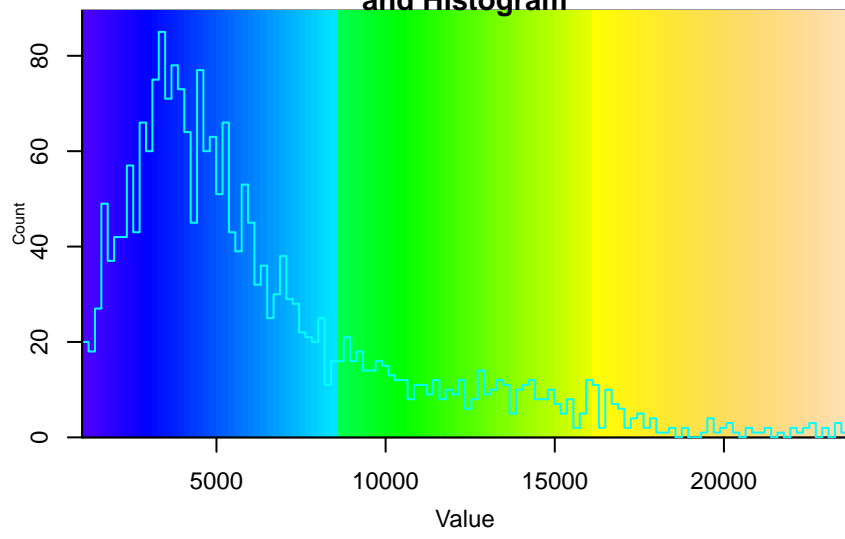

PM2 strain 2 -AUC

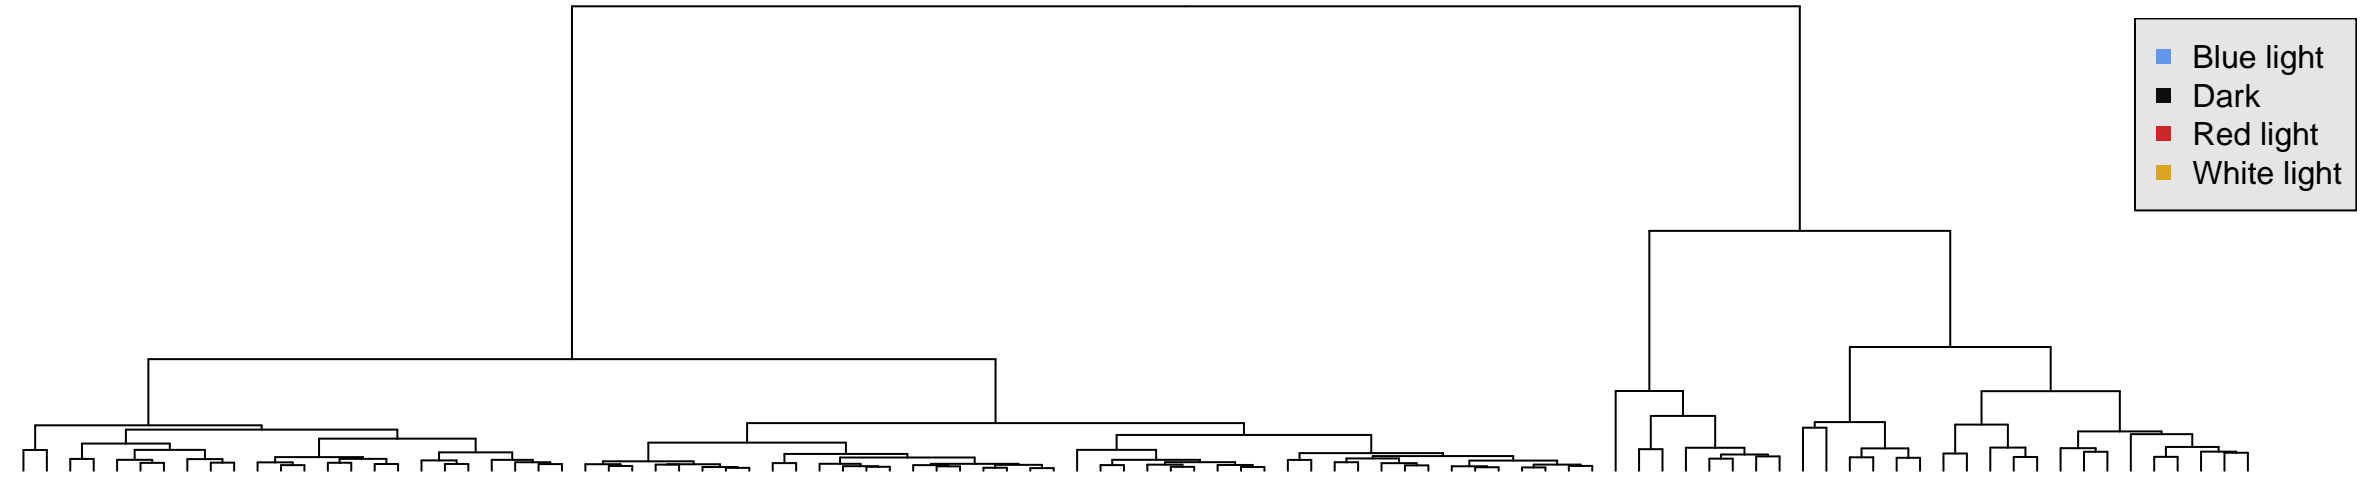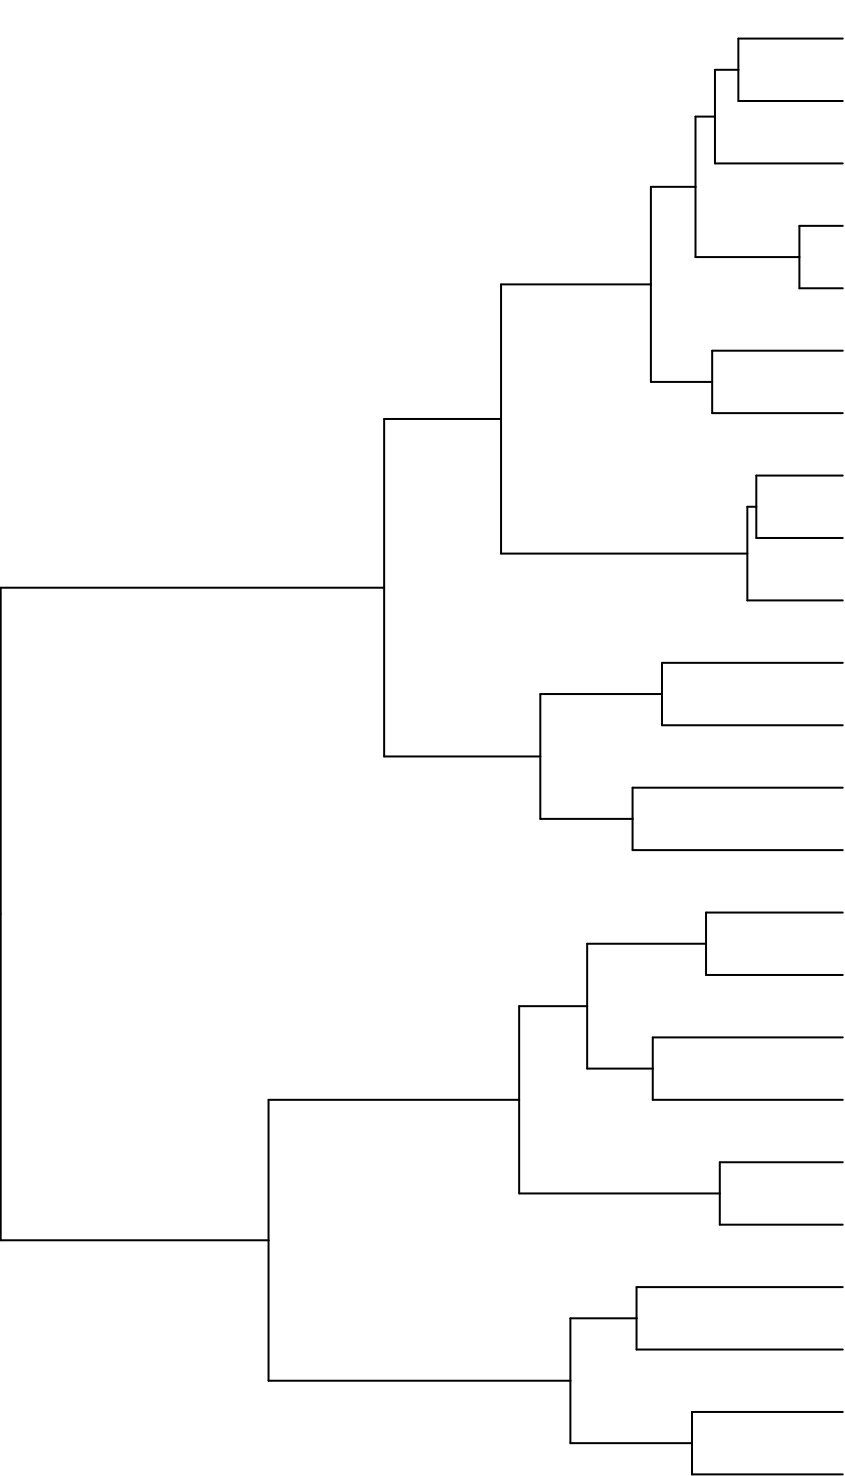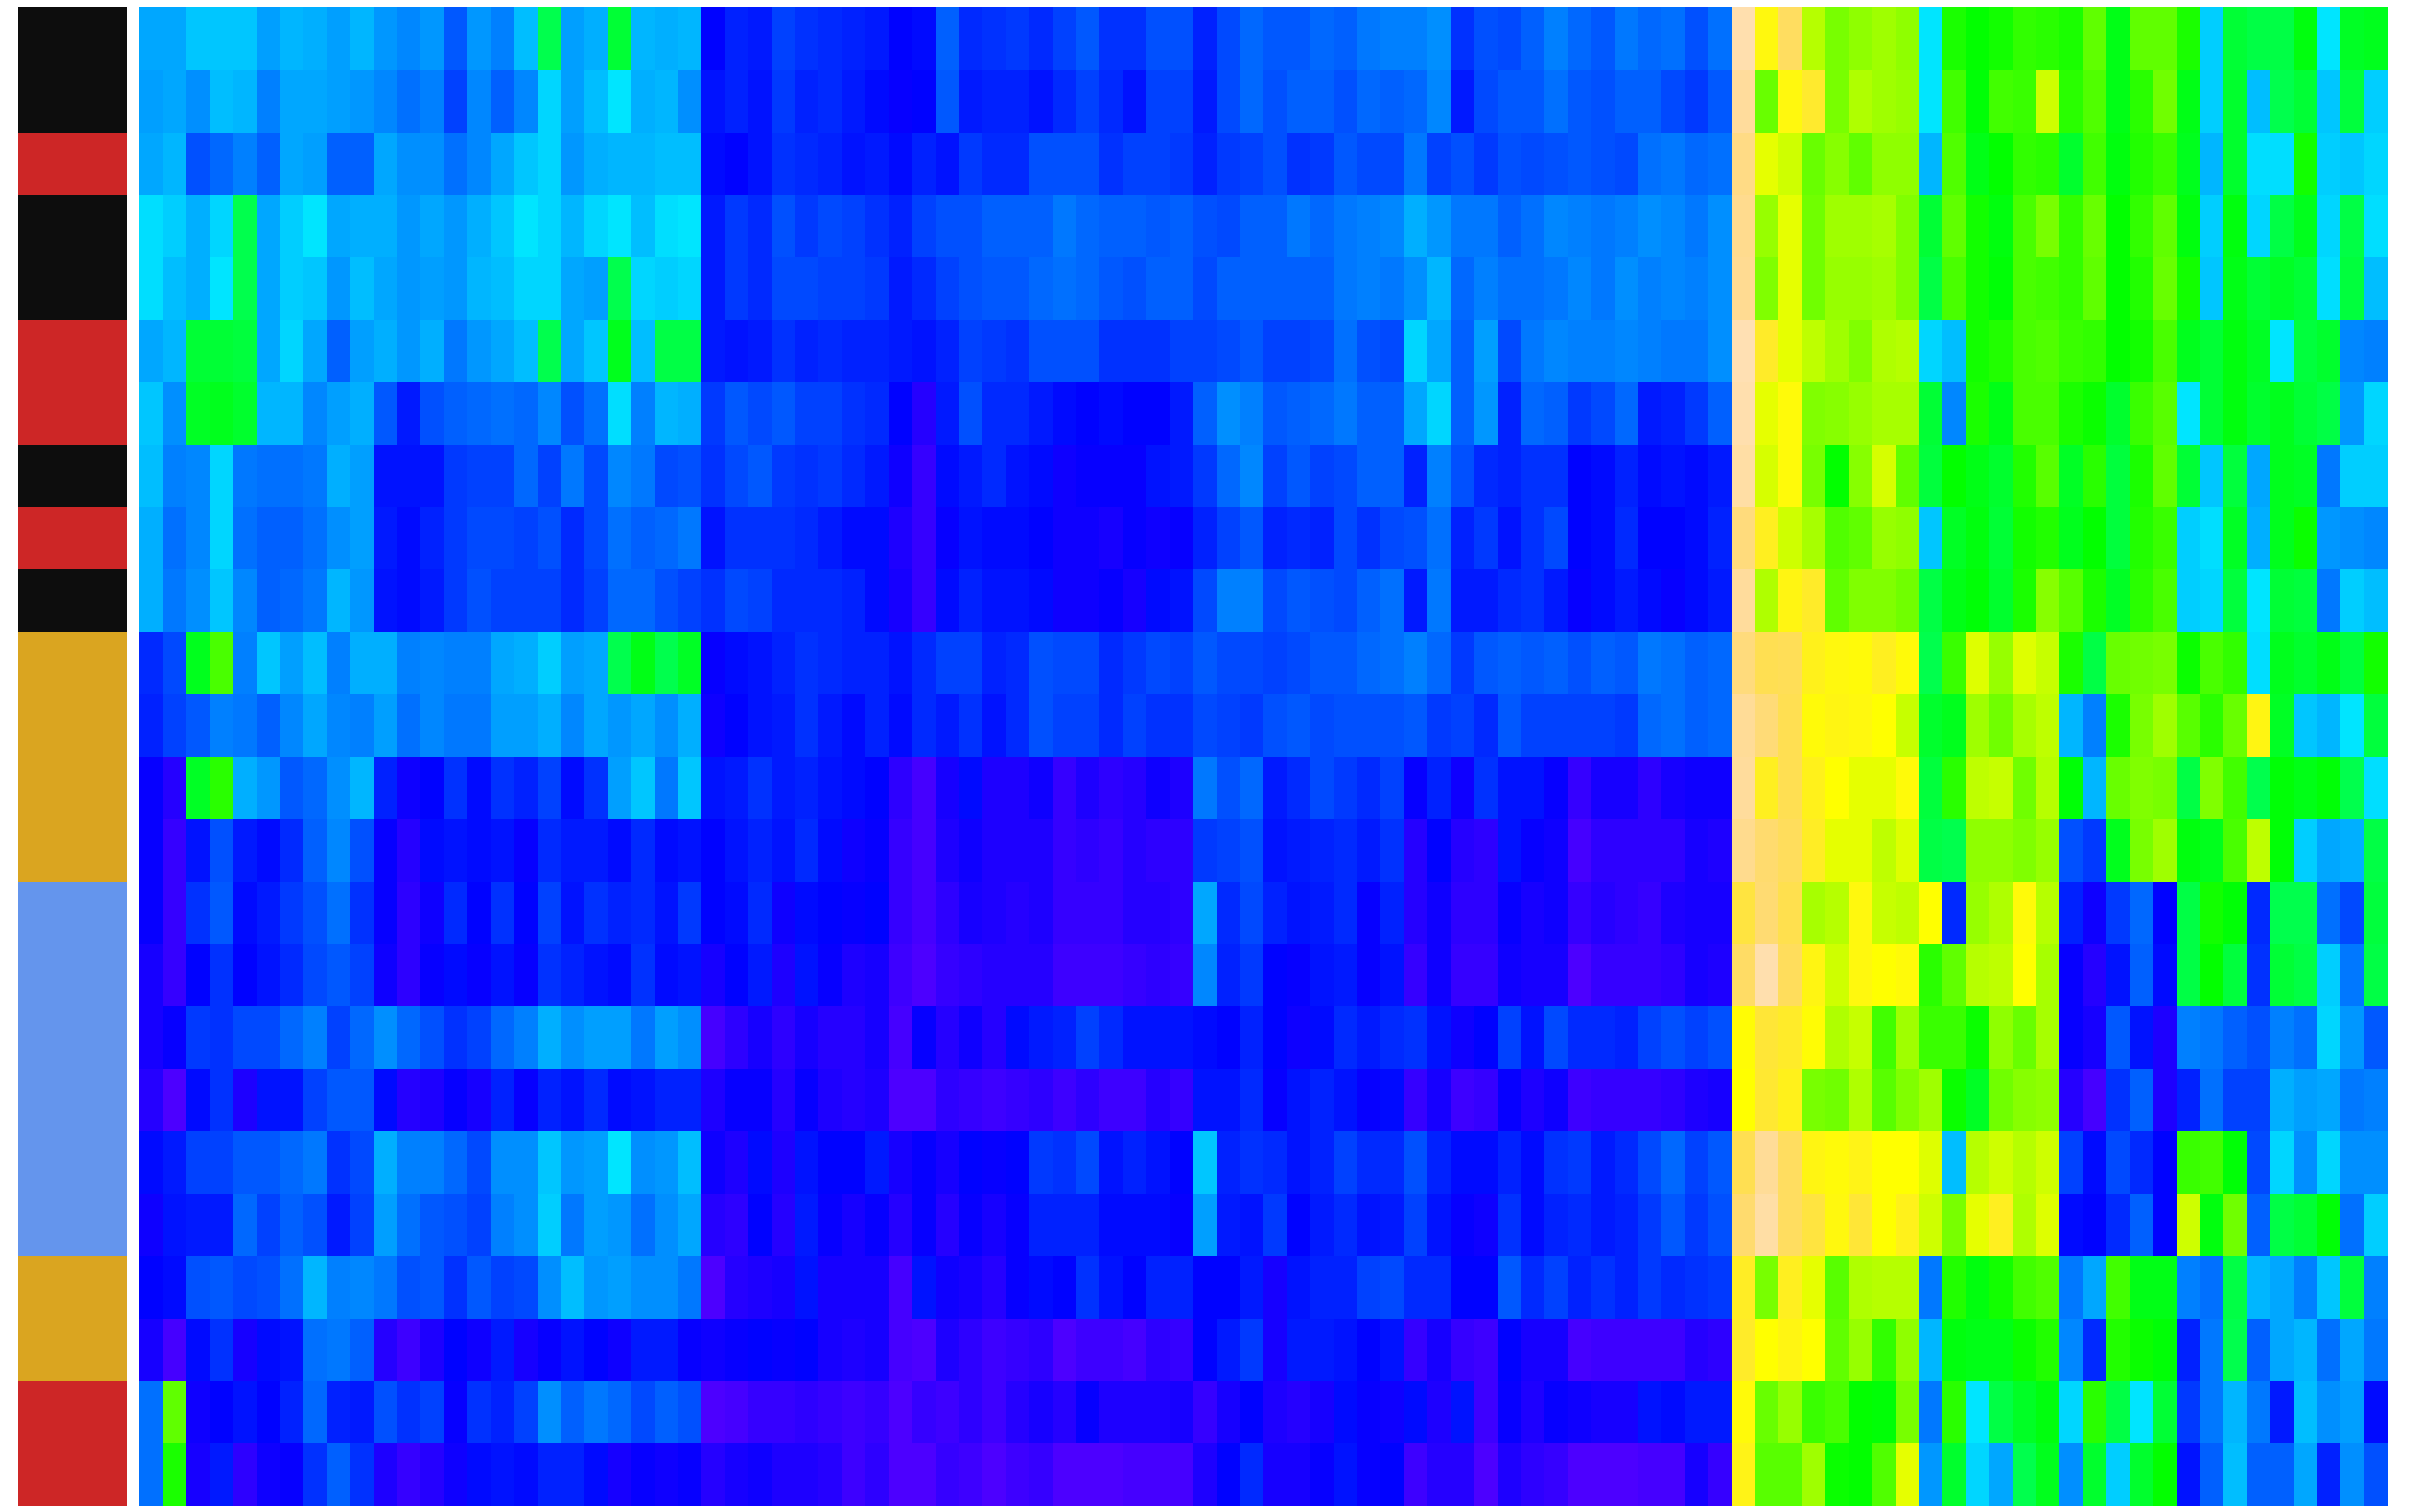

F10 (Borneo Acid)  
 E07 (4-Methyl-3-bromo Acid)  
 D05 (D-Sorbitol)  
 D11 (D-Raffinose)  
 B06 (Biotin)  
 B04 (Nagardol)  
 A05 (p-Cyclohexene)  
 A02 (Chroman Subst C)  
 A01 (Methyl-Cinnamic Acid)  
 C07 (p-Gentisic Acid)  
 B11 (D-Fucose)  
 B10 (m-Erythritol)  
 B08 (2-Deoxy-D-Ribose)  
 F12 (L-Threonine Acid)  
 B05 (D-Arabinose)  
 E12 (S-iso-B-Glucosaminic Acid)  
 D12 (Biotin Acid)  
 -C-C-O-C-Glucosylmethyl-D-Arabinose  
 A03 (Erythritol)  
 A11 (Mannitol)  
 A10 (Lactaric Acid)  
 A08 (p-Oxyacetamide)  
 A06 (Glycerol)  
 C12 (Phenol)  
 H06 (Bifurcic Acid)  
 H10 (2,3-Burseradiol)  
 H11 (2,3-Burseradiol)  
 G00 (Glycerol)  
 F10 (Chroman Acid)  
 H07 (DL-Citronellol)  
 F03 (Methylacetic Acid)  
 F11 (D-Tartronic Acid)  
 G07 (L-Neopterin)  
 E06 (2-Methyl-3-bromo Acid)  
 F04 (DMAP Acid)  
 F02 (Sibonamic Acid)  
 F07 (D-Ribose-1,4-Lactone)  
 E08 (p-Hydroxy-Butyric Acid)  
 E11 (Formic Acid)  
 C08 (S-C-Methyl-D-Glucoside)  
 D06 (D-Tiglic Acid)  
 D04 (Hydro)  
 D09 (N-Acetyl-D-Glucosamine)  
 D04 (L-Sorbitol)  
 D03 (Sedoheptulose)  
 G06 (L-Isosorbide)  
 G11 (L-Lyxose)  
 H12 (3-Hydroxy-2-Burseradiol)  
 G12 (L-Malic Acid)  
 G01 (Acetamide)  
 G02 (L-Malic Acid)  
 F10 (Biotinamic Acid)  
 C02 (L-Glucoside)  
 B02 (N-Methyl-Neuraminic Acid)  
 C06 (L-Methyl-D-Glucosaminic Acid)  
 E10 (p-Hydroxy-Valeric Acid)  
 D08 (Biotinyl Acid)  
 B01 (D-Allose)  
 C05 (D-Lactulose)  
 D07 (Erythritol)  
 C09 (p-Methyl-D-Glucoside)  
 C03 (Maltose)  
 C02 (L-Glucoside)  
 D11 (2-Amino-Valeric Acid)  
 C10 (p-Methyl-D-Mannoside)  
 D10 (p-Amino-n-Butyric Acid)  
 C11 (p-Methyl-D-Xylopyranoside)  
 G08 (p-Hydroxyphenol)  
 H08 (Phenol)  
 H03 (L-Phosphoric Acid)  
 F08 (Quinic Acid)  
 E09 (p-Hydroxy-Butyric Acid)  
 G04 (L-Arginine)  
 F11 (D-Lactic Acid Methyl Ester)  
 D10 (p-Amino-n-Butyric Acid)  
 H09 (Biotinyl-Acetic Acid)  
 A07 (Glutamic Acid)  
 E05 (p-Glucosamine)  
 B08 (D-Arabinose)  
 E04 (p-Chroman Acid)  
 G03 (N-Acetyl-L-Glutamic Acid)  
 E03 (Chroman Acid)  
 E02 (Caproic Acid)  
 F02 (Mannonic Acid)  
 H04 (L-Mannitol)  
 G09 (L-Ascorbic Acid)  
 A04 (p-Oxyacetamide)  
 A12 (Phenol)  
 G10 (L-Leucine)  
 E01 (Citric Acid)  
 H01 (L-Citronellol)  
 H02 (L-Phenylalanine)  
 A06 (Glycerol)  
 B07 (N-Acetyl-D-Glucosamine)

D5  
 D2  
 r4  
 D3  
 D6  
 r2  
 r1  
 D4  
 r3  
 D1  
 w2  
 w4  
 w1  
 w3  
 b1  
 b3  
 b6  
 b5  
 b2  
 b4  
 w6  
 w5  
 r6  
 r5

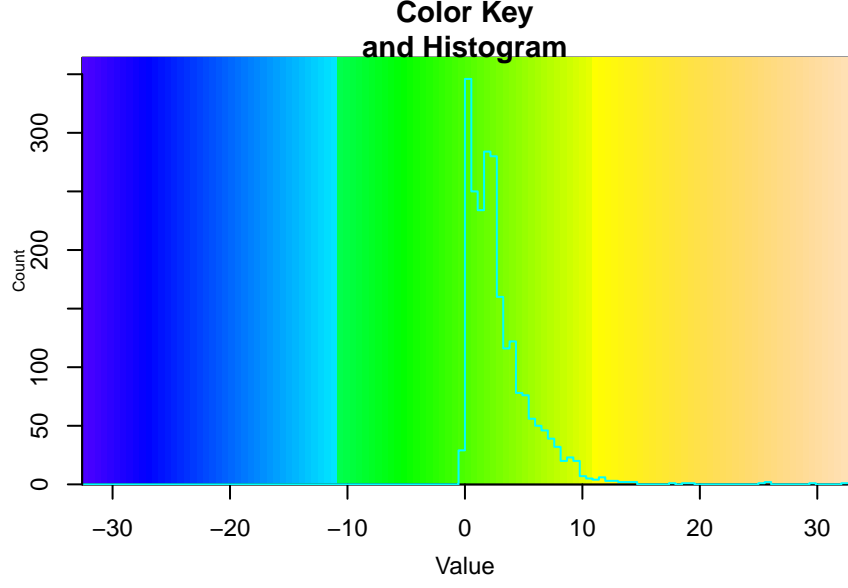

### PM02 strain 2 -mu

- Blue light
- Dark
- Red light
- White light

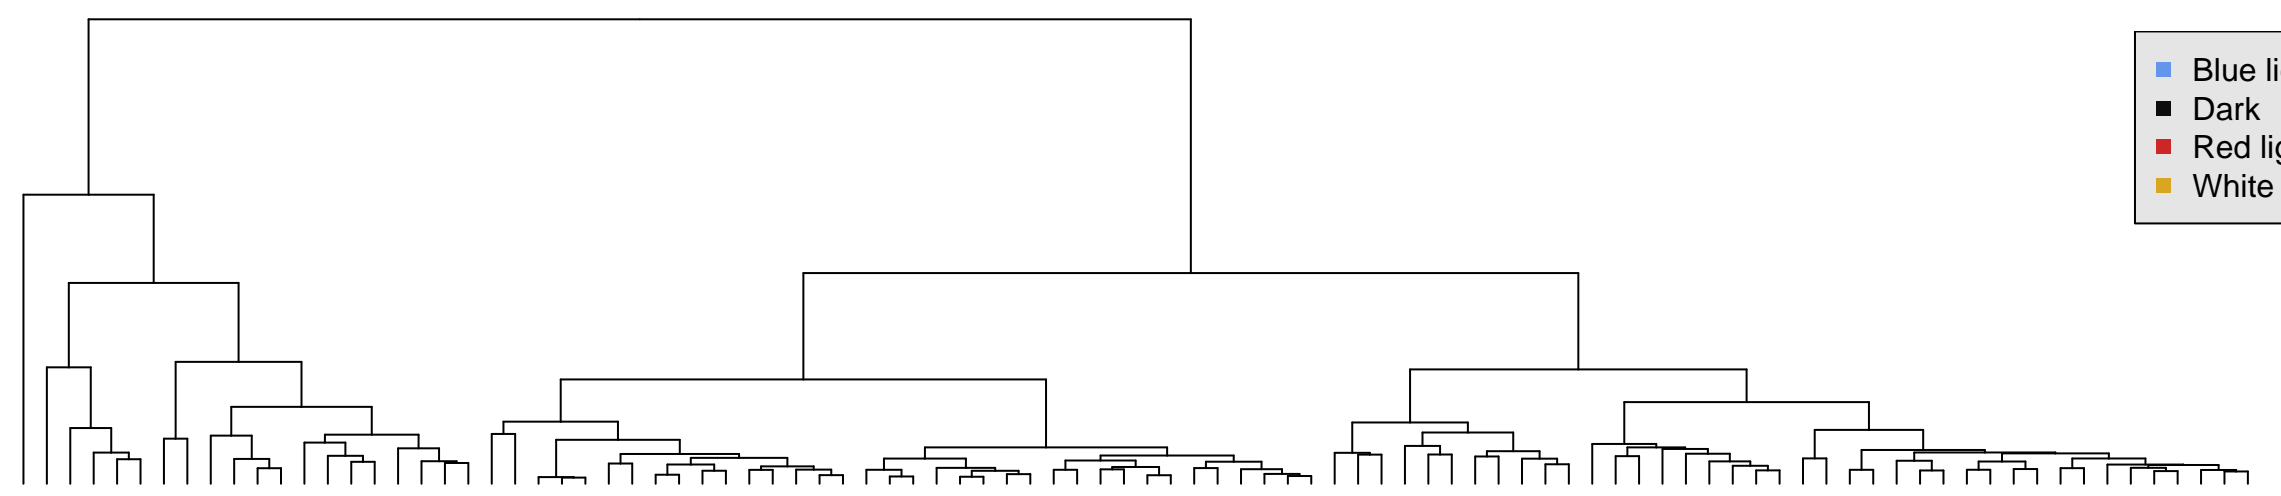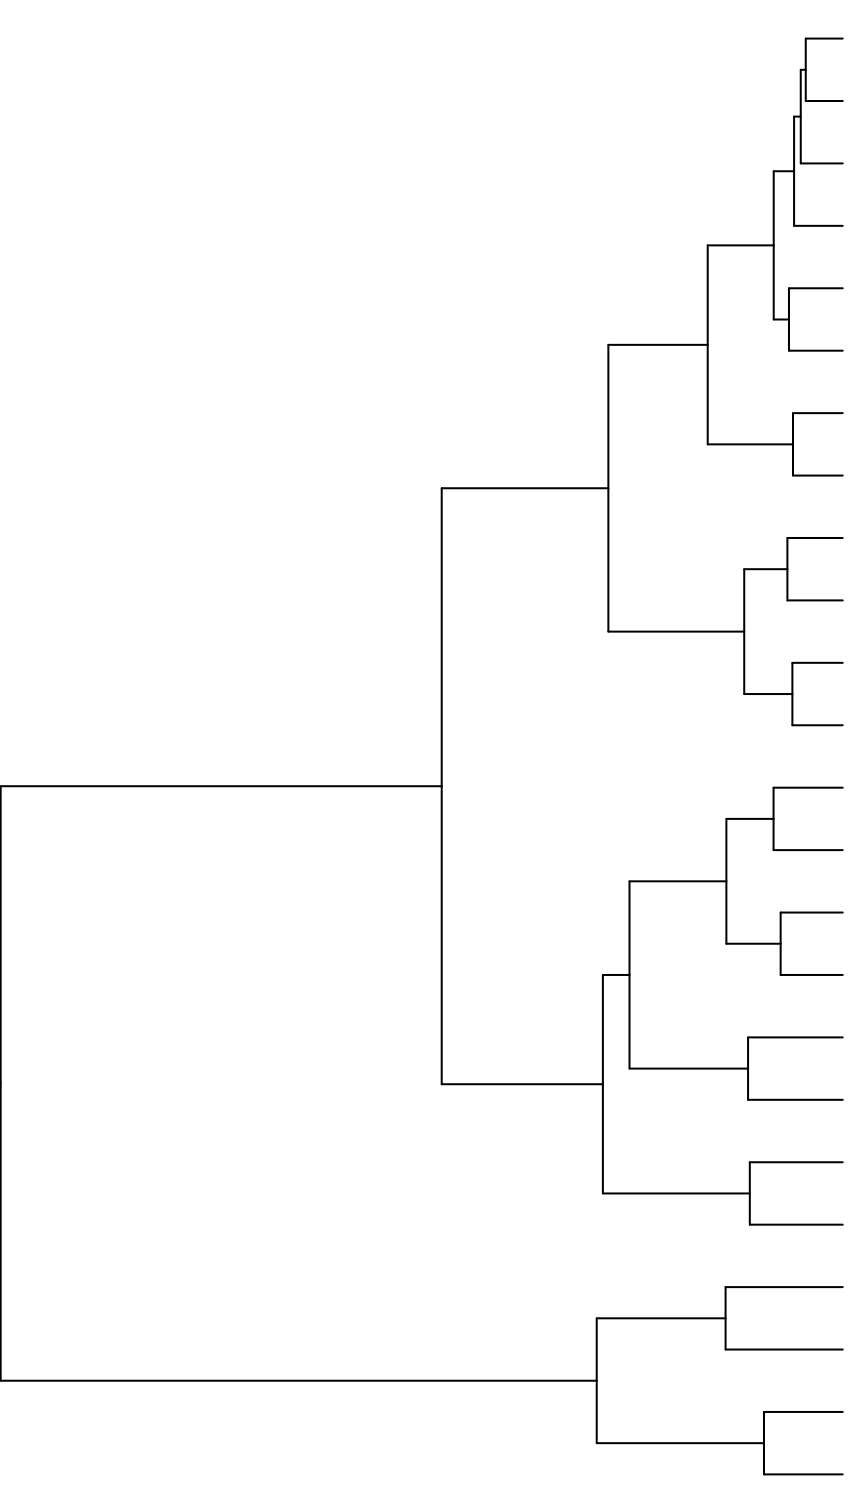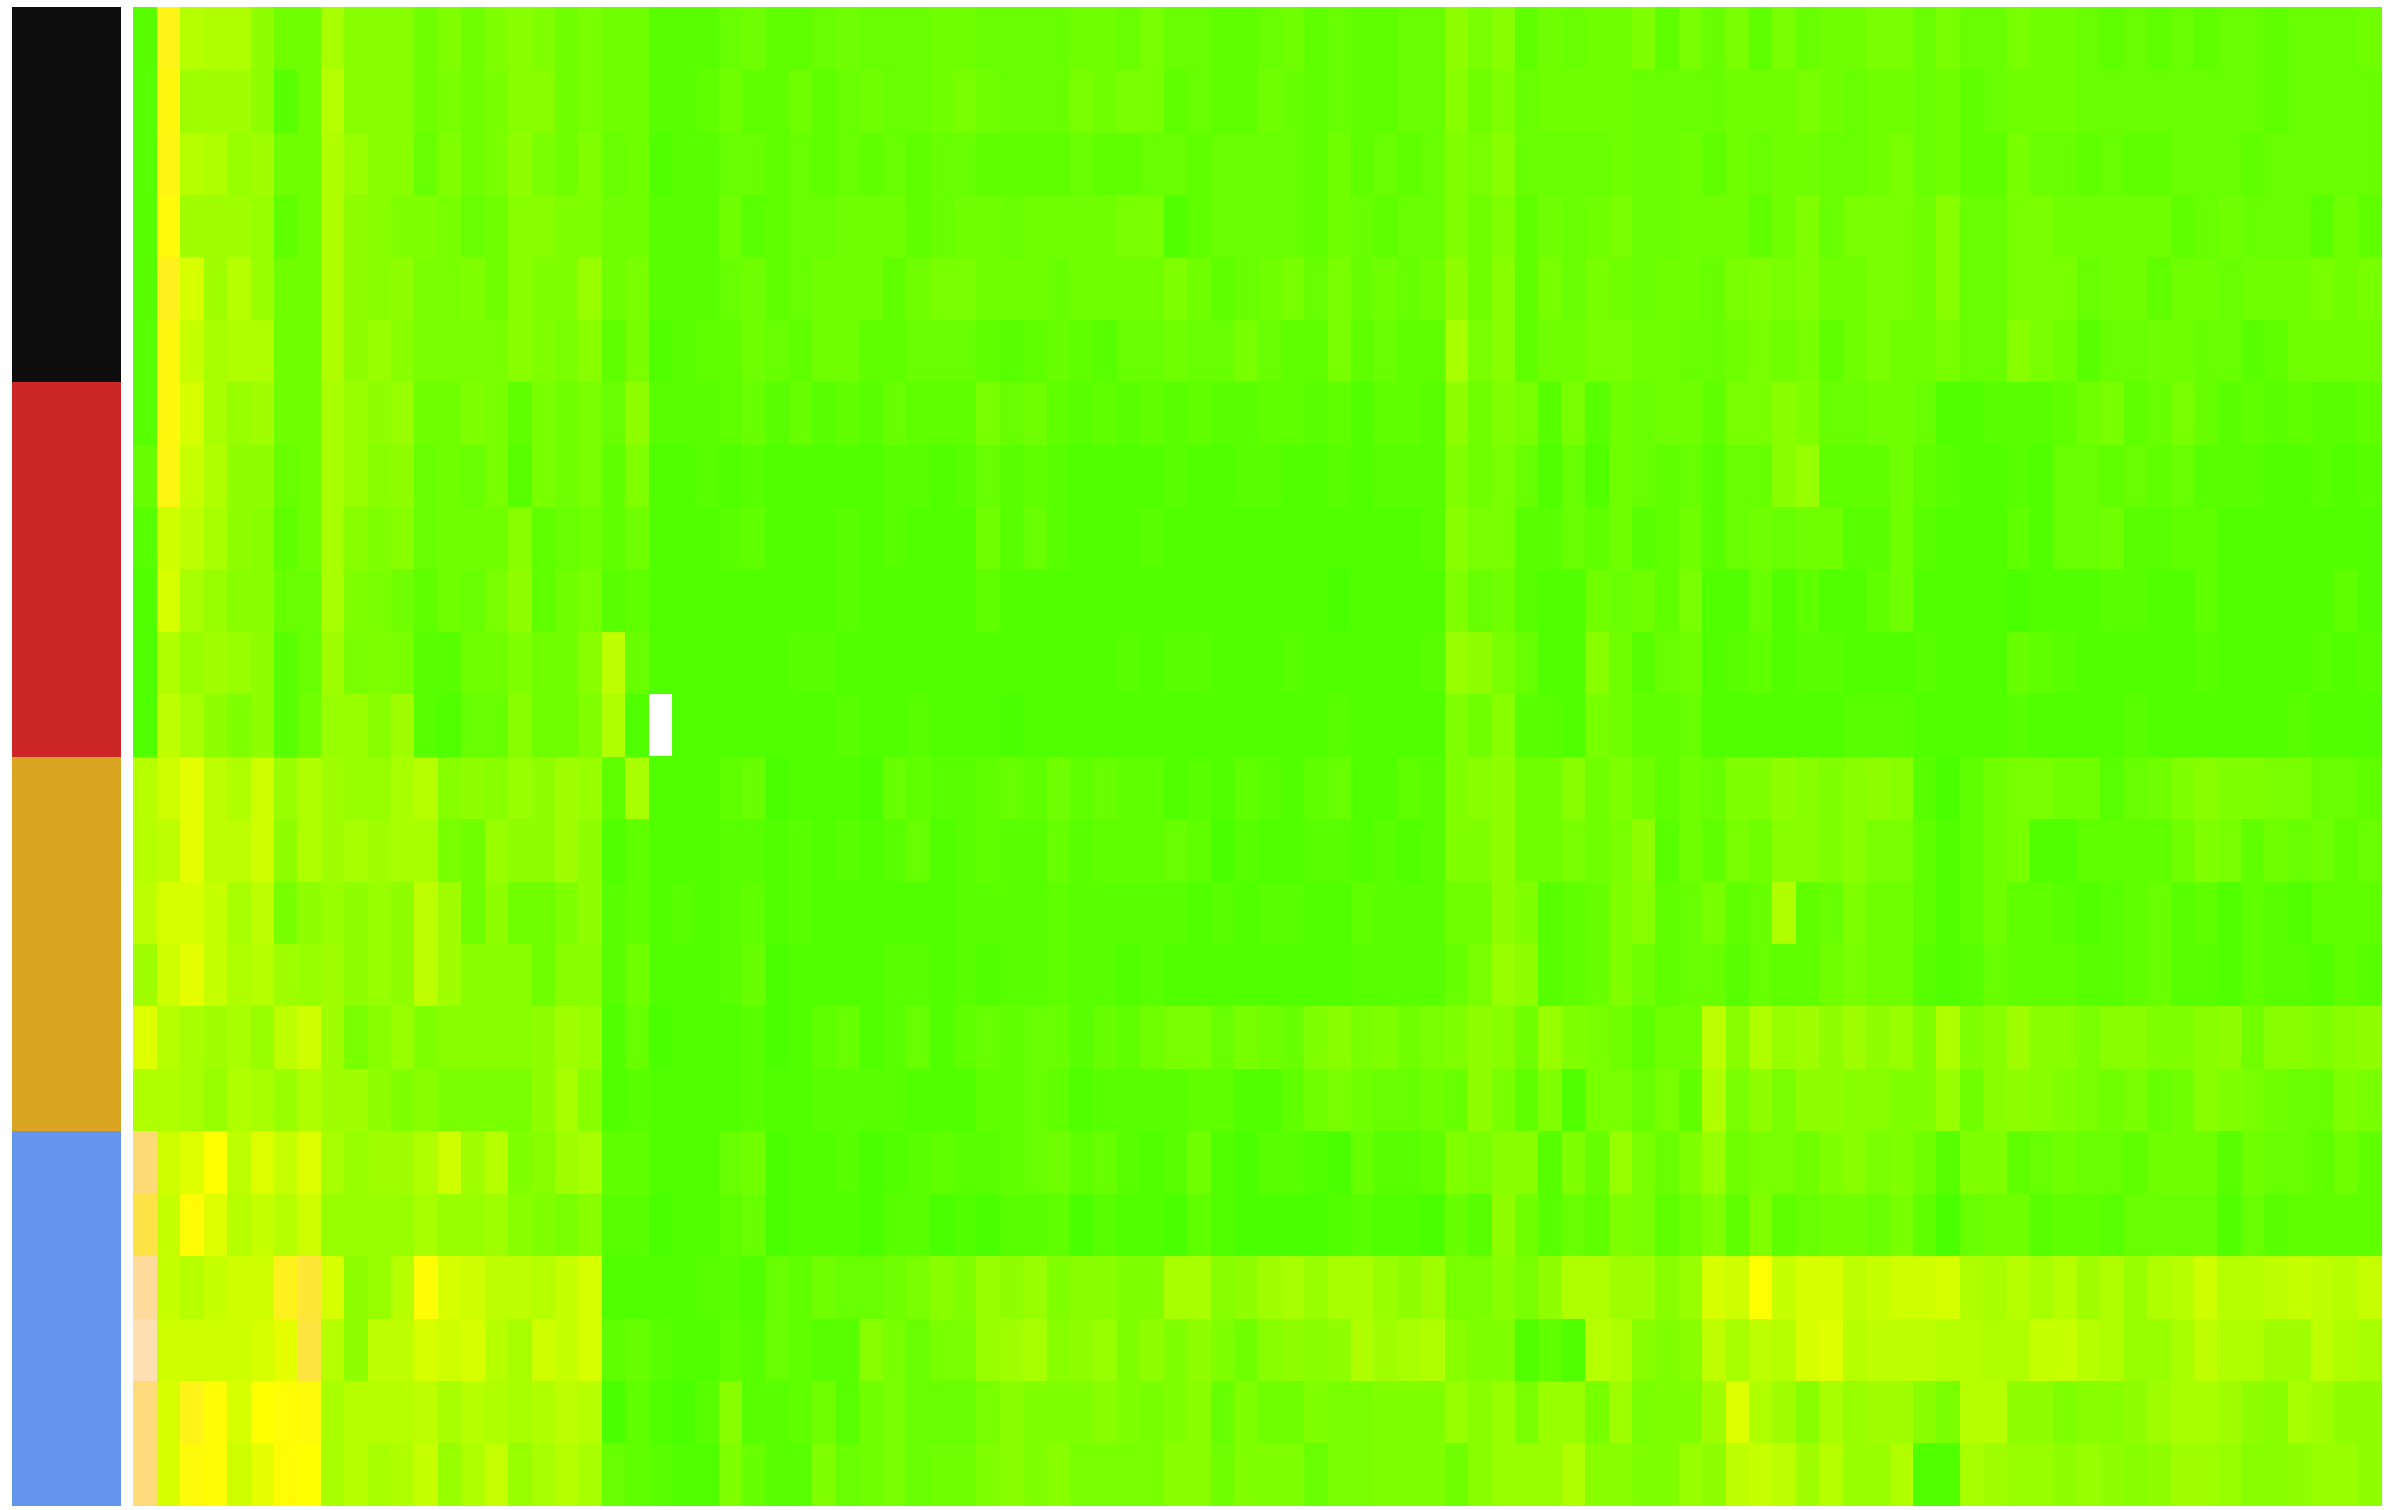

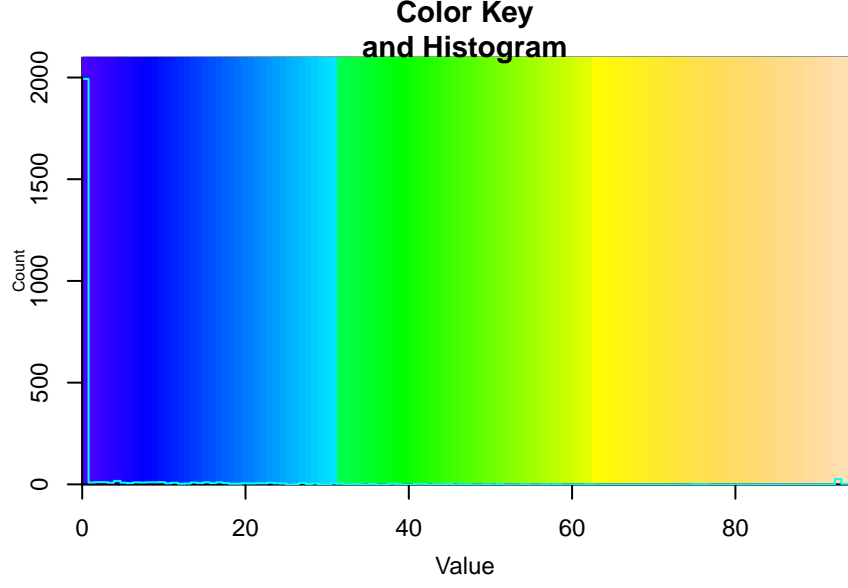

### PM02 strain 2 -lambda

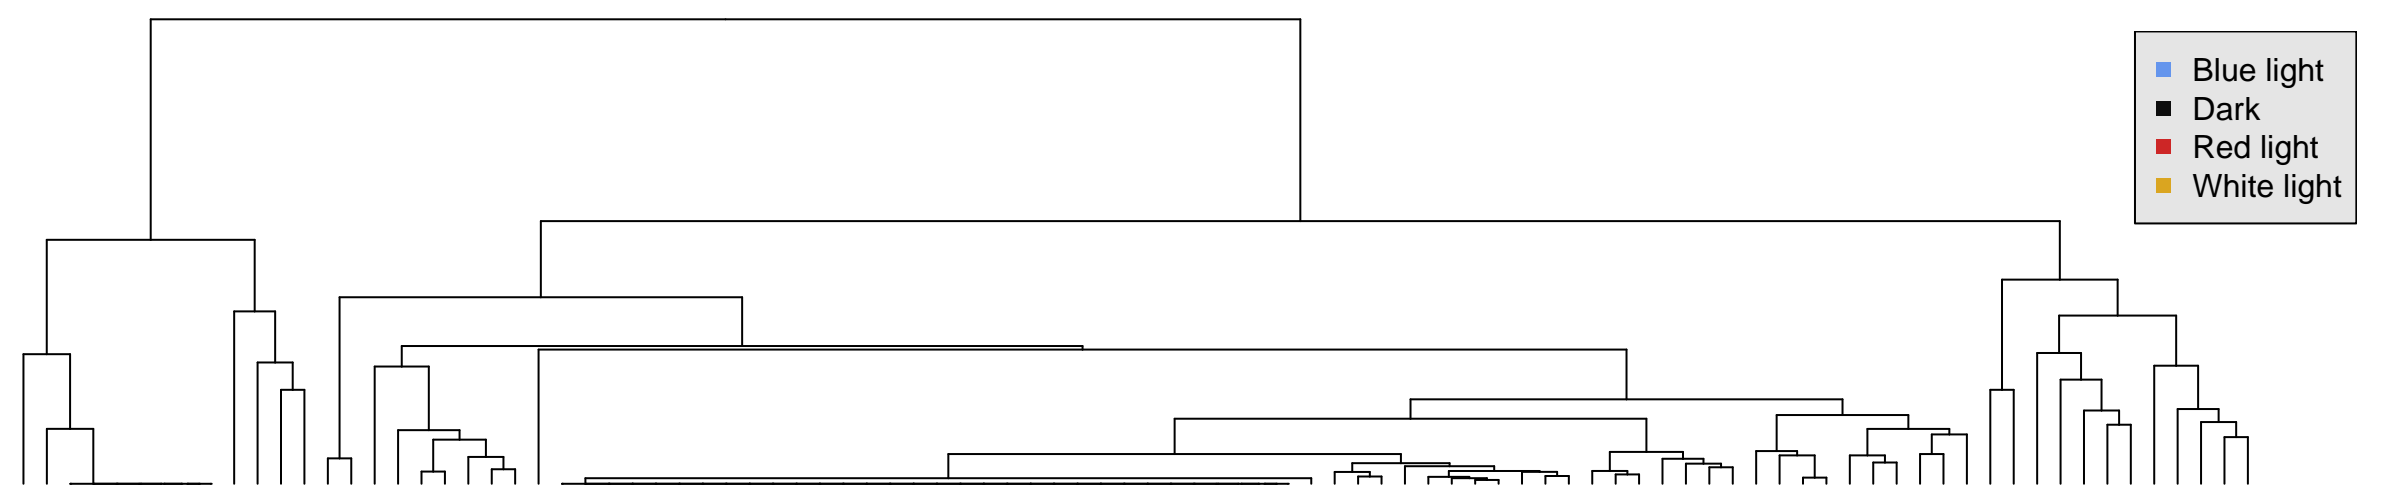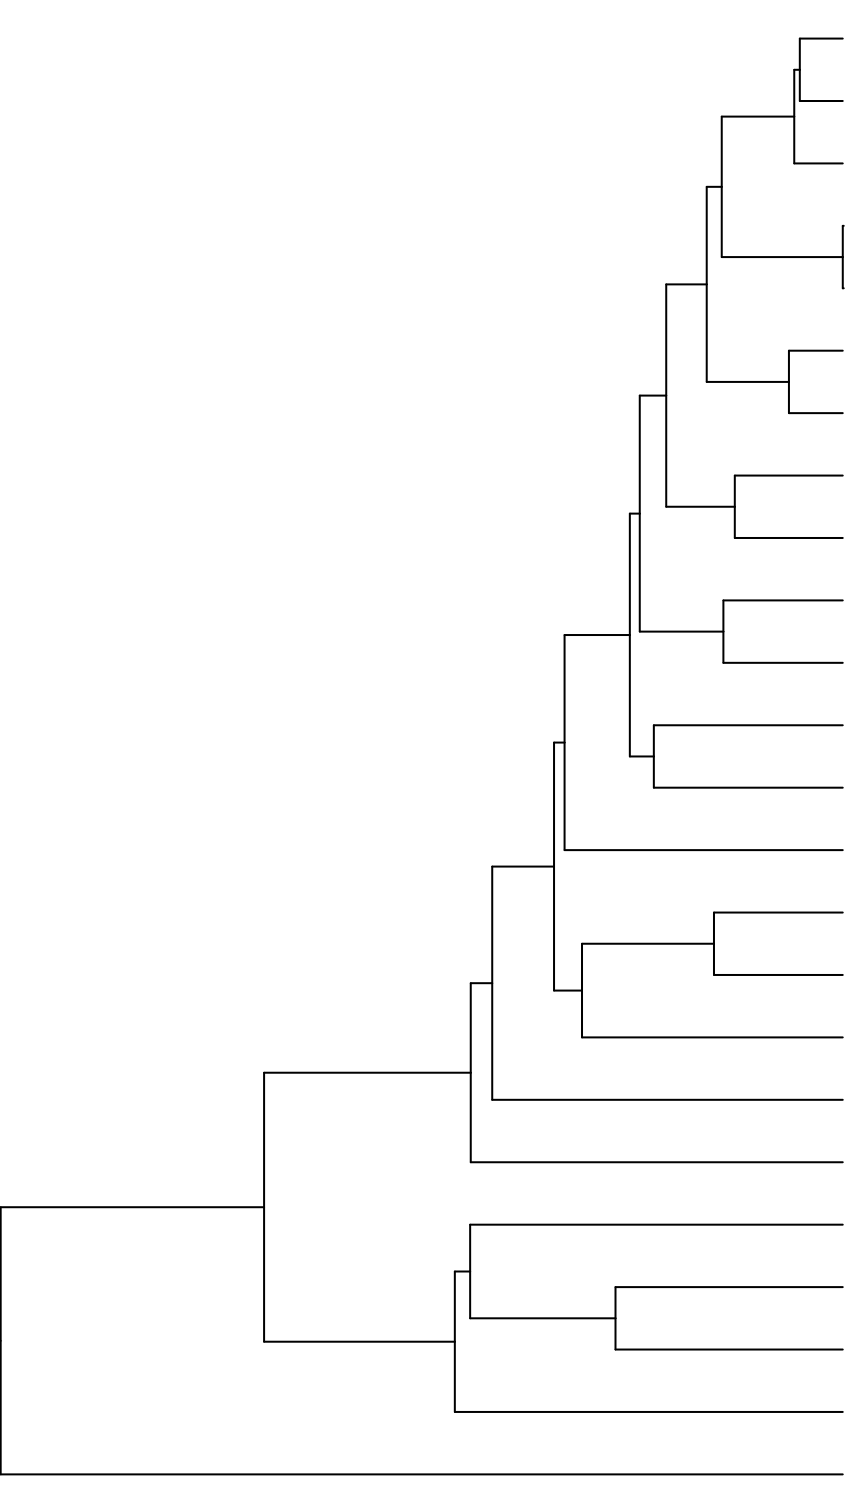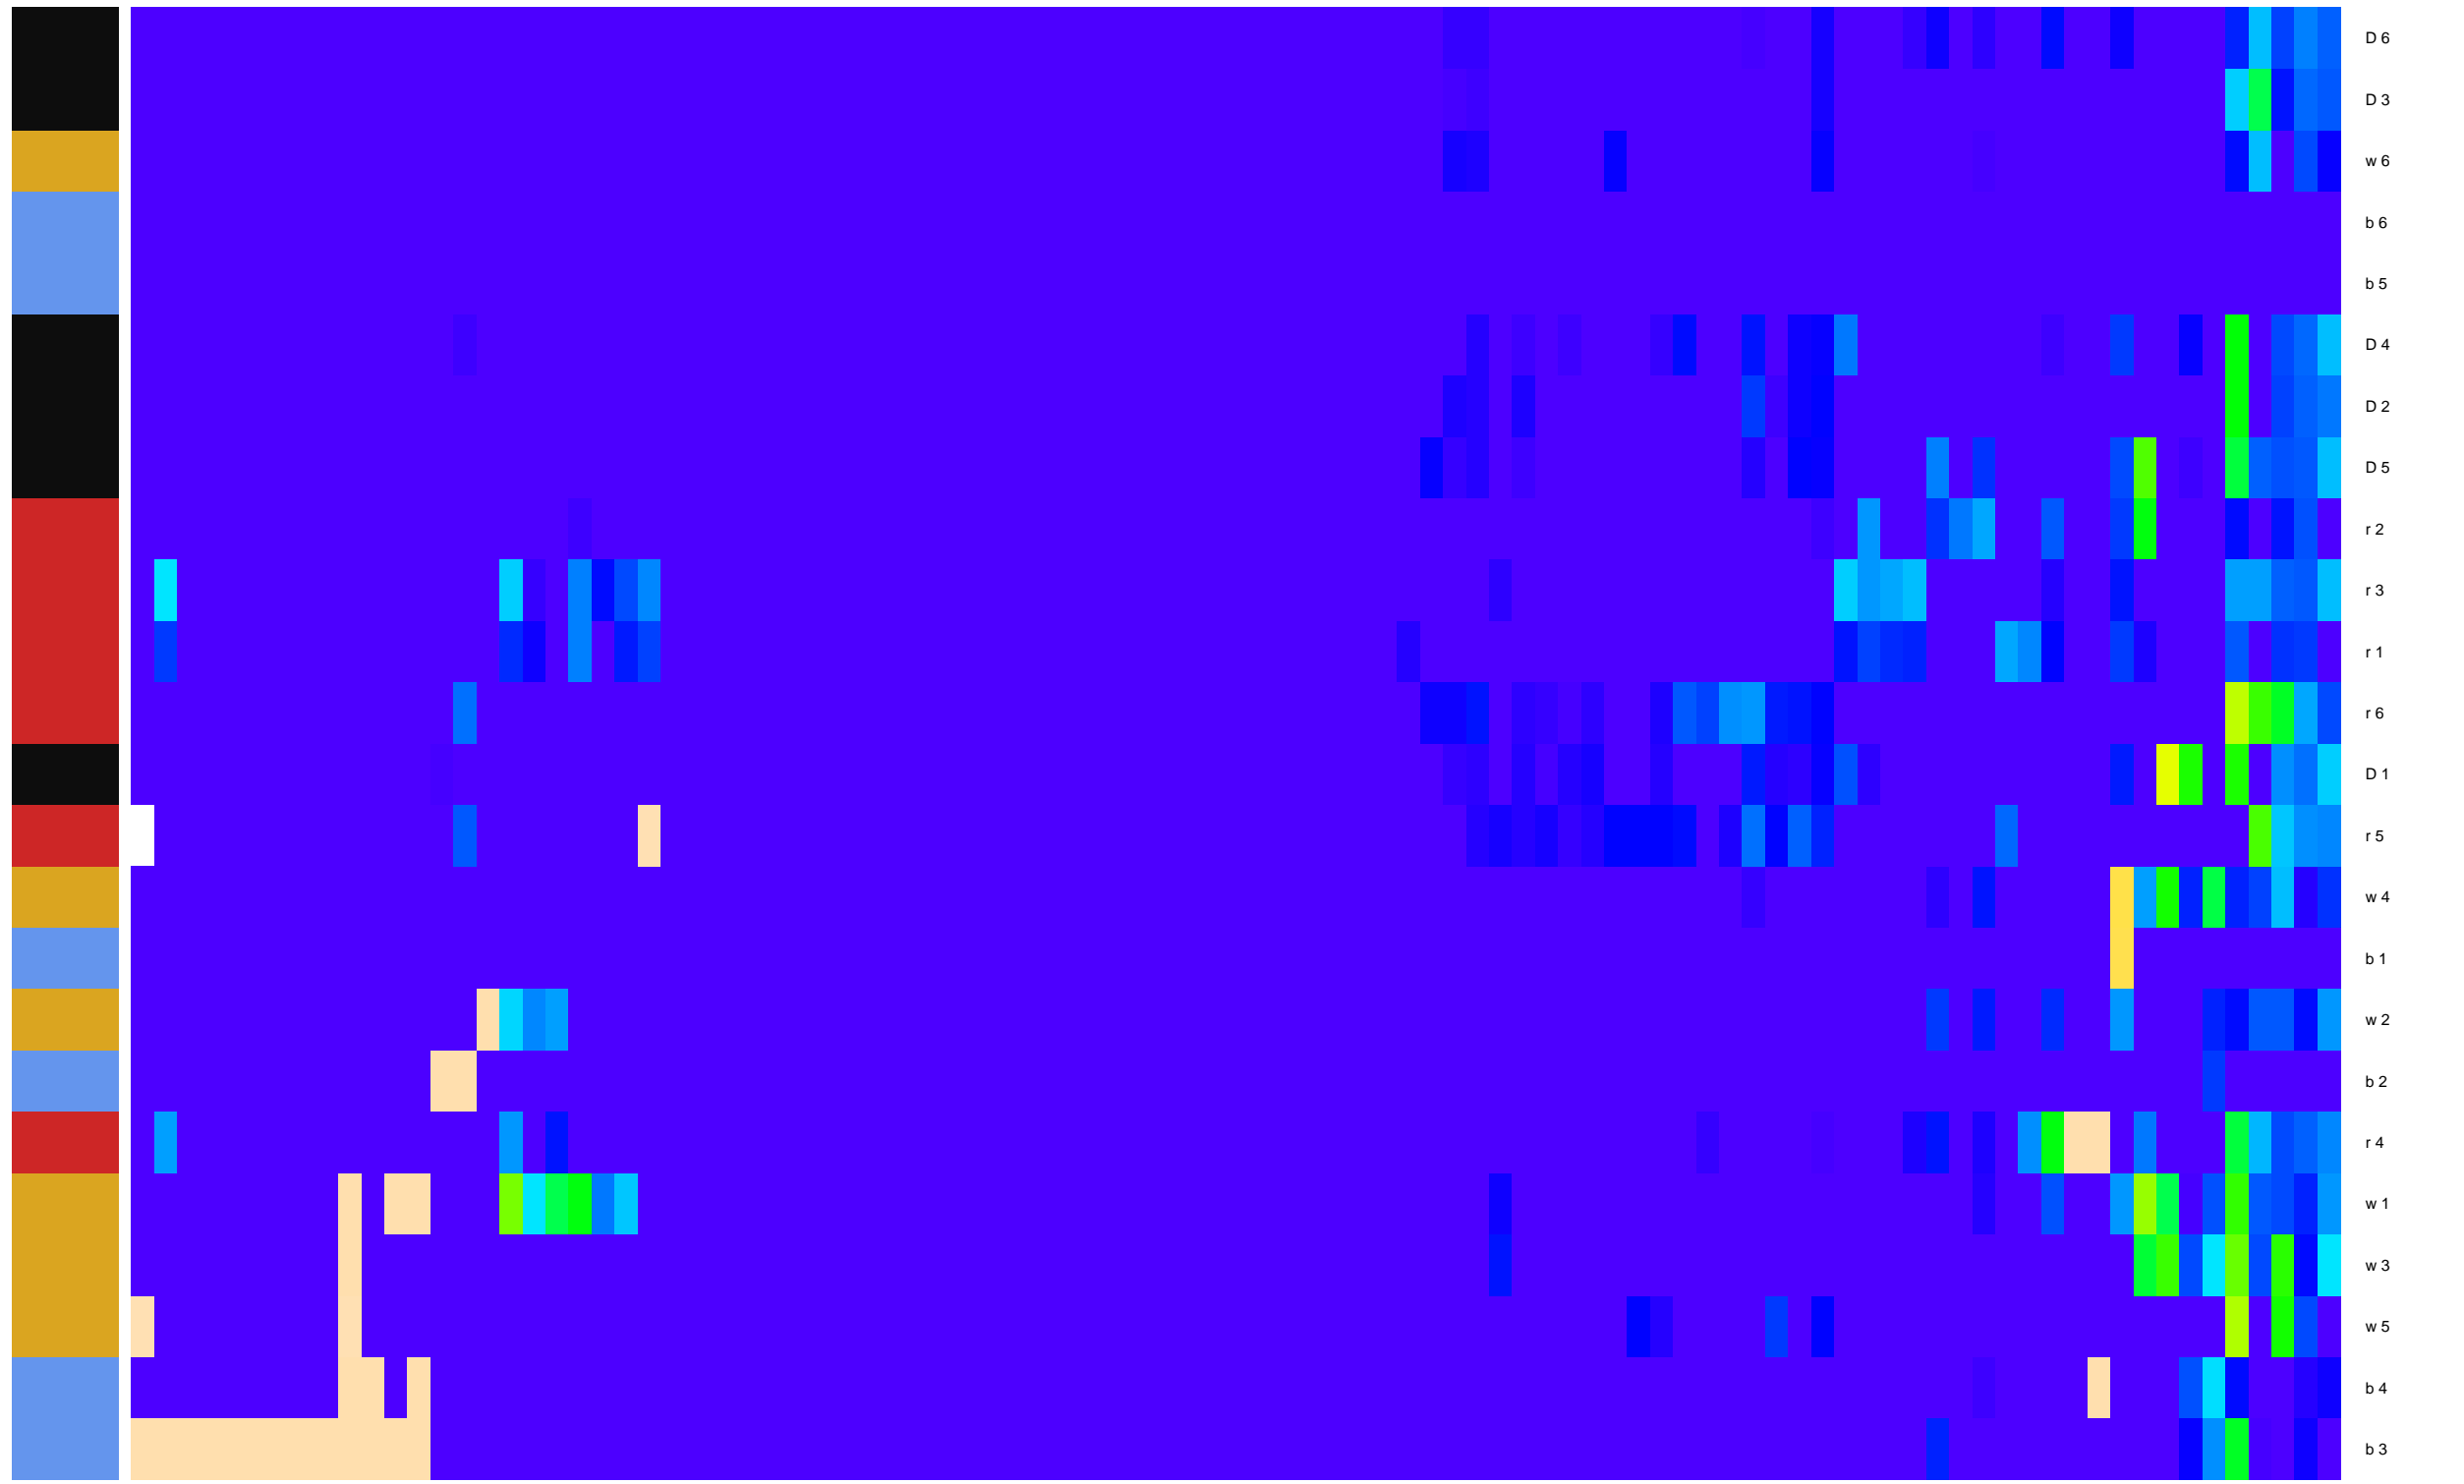



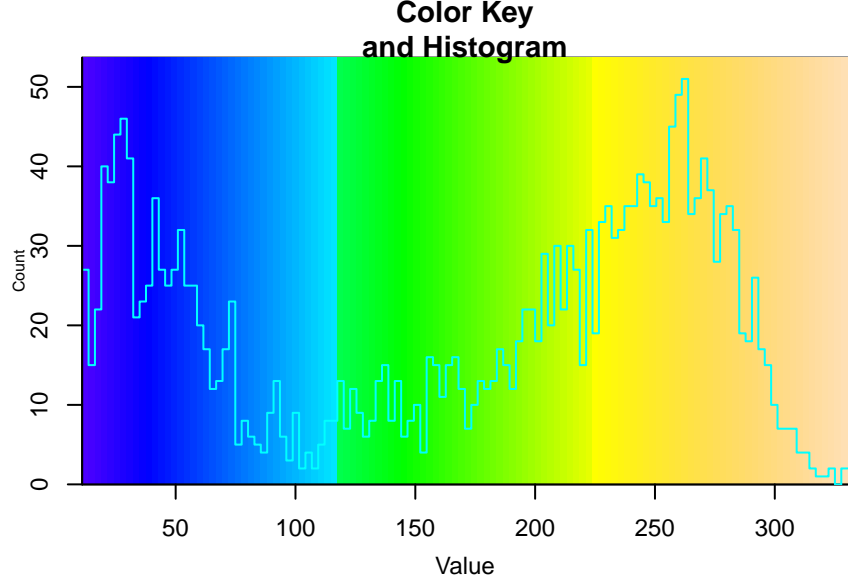

PM03 strain 2 -A

- Blue light
- Dark
- Red light
- White light

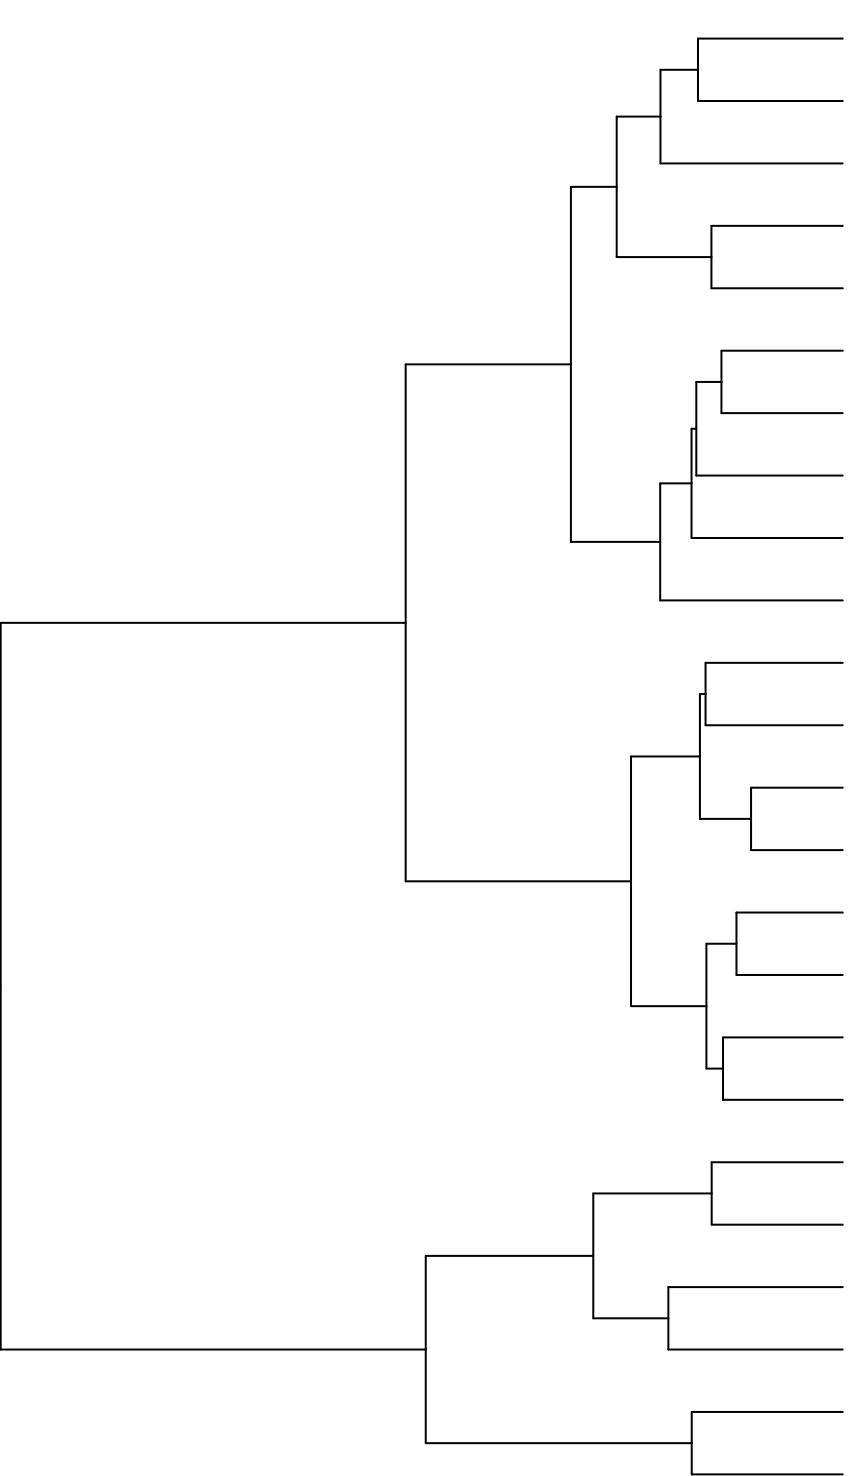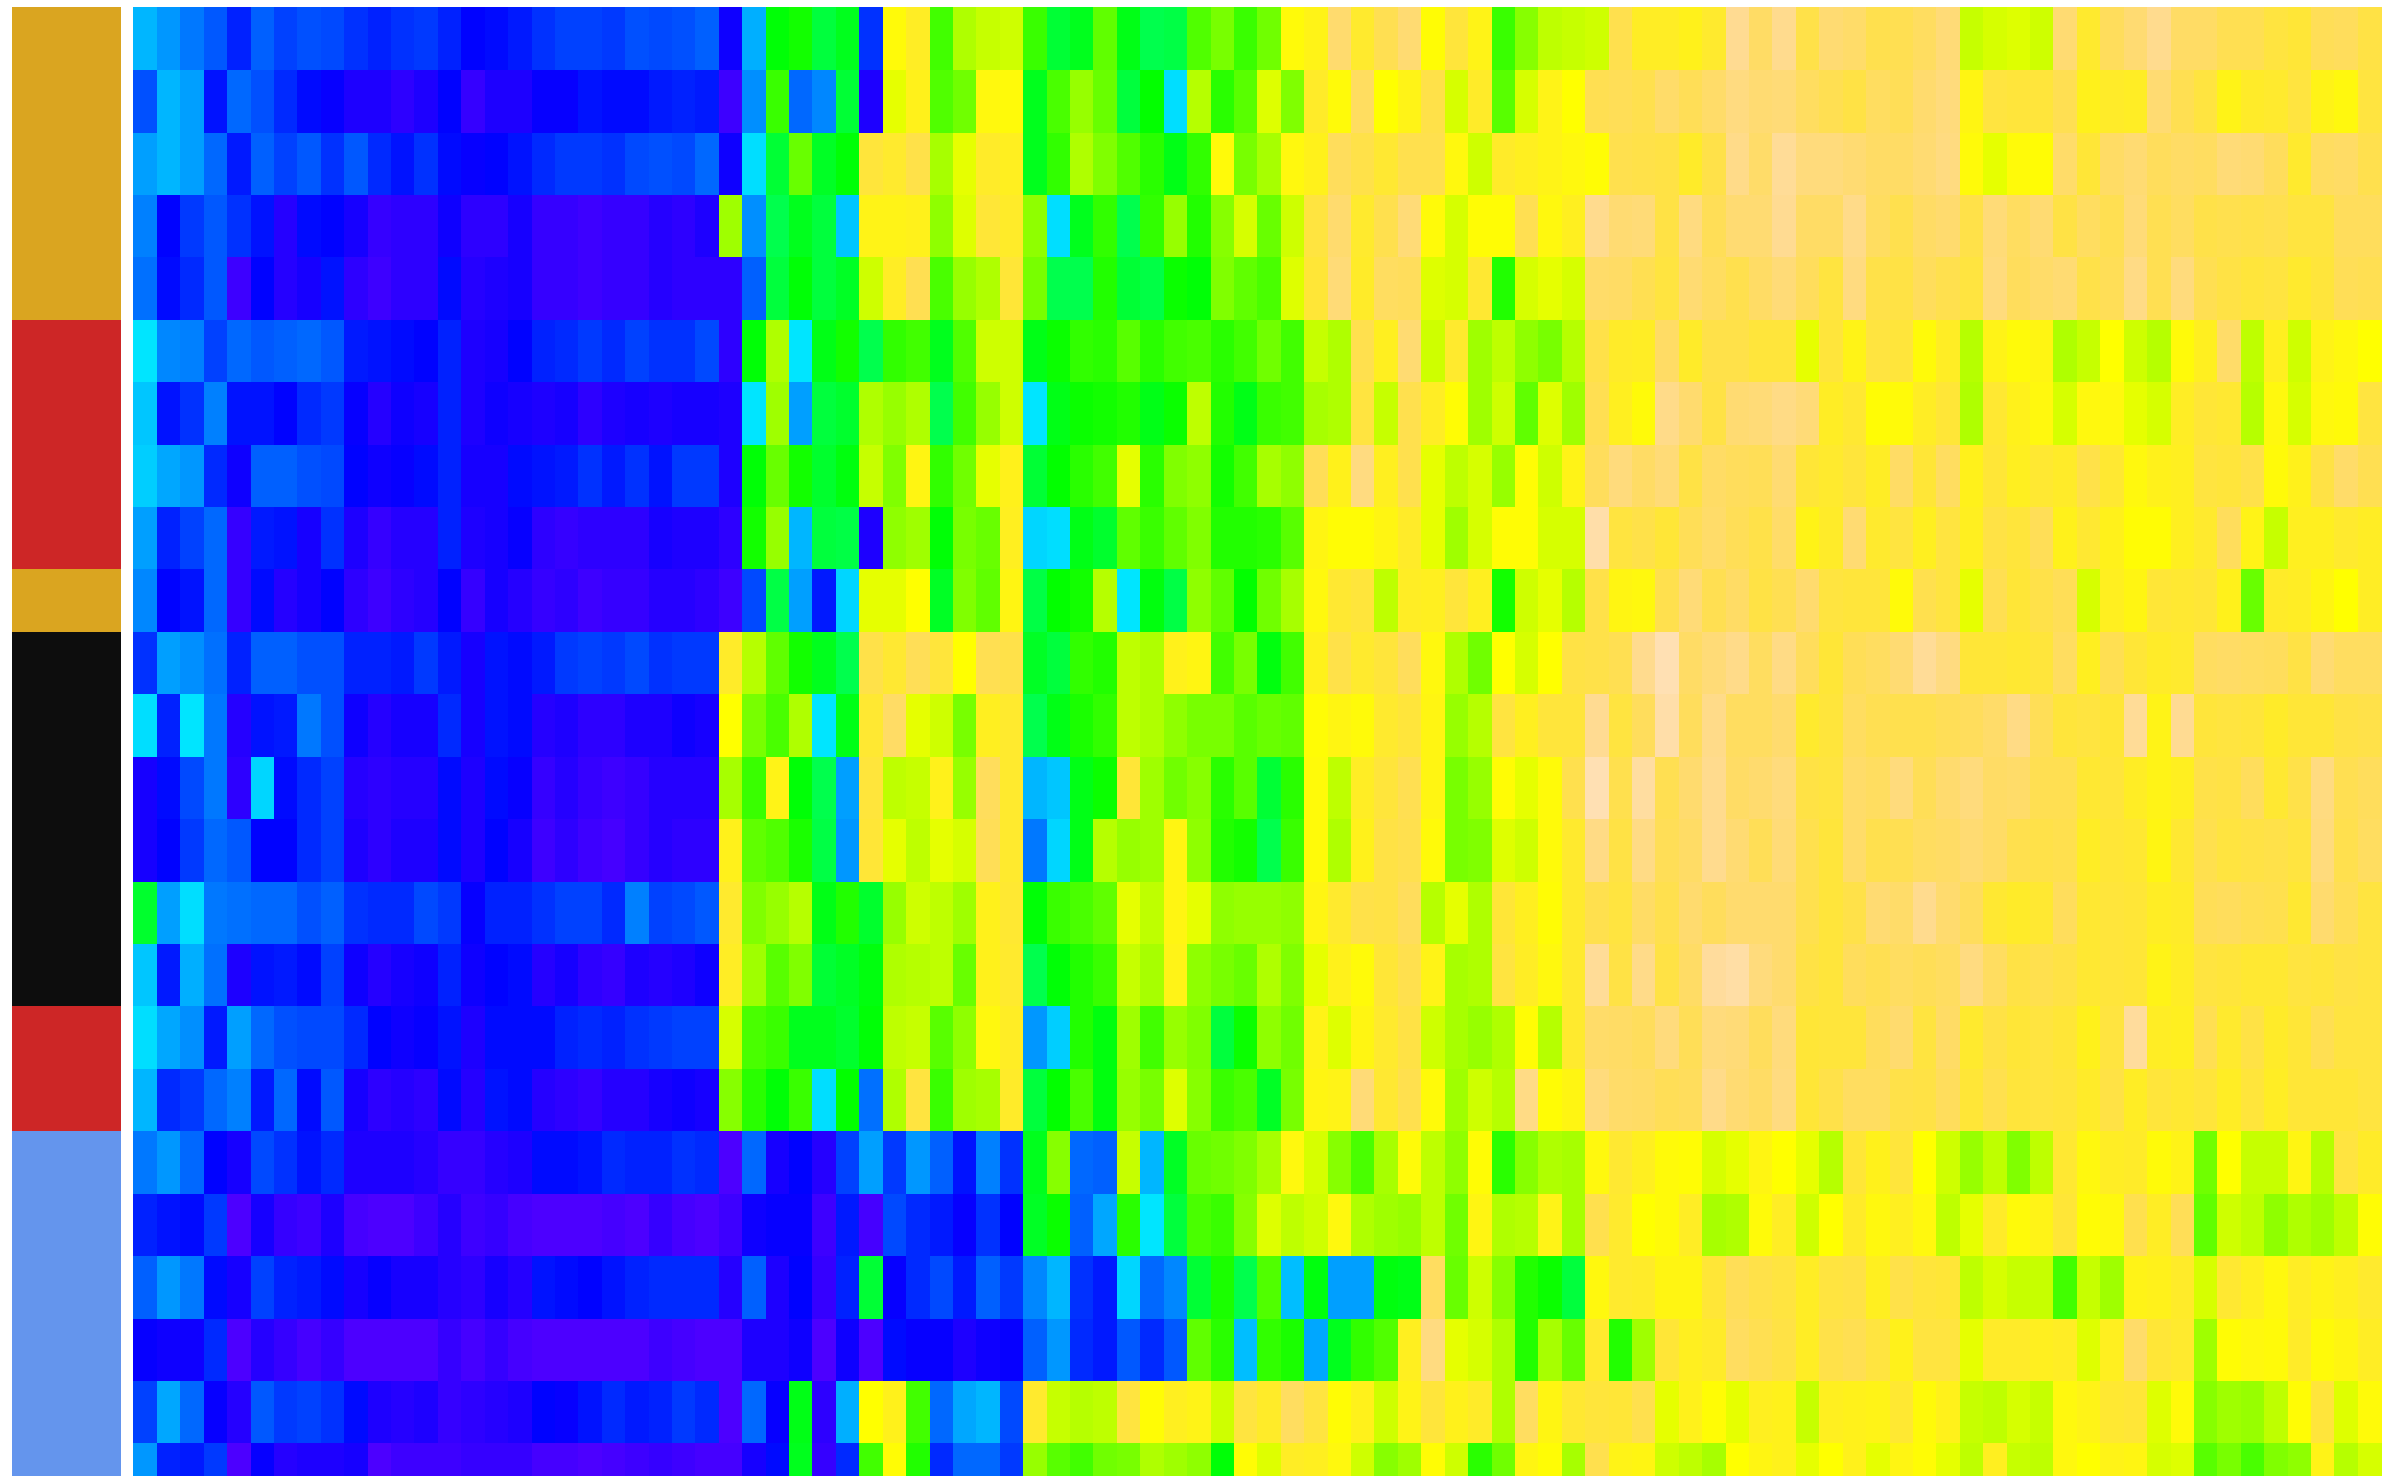

E12 (N-Acetyl-D-Galactosamine)  
 B12 (L-Tyrosine)  
 A11 (L-Cysteine)  
 A01 (Nephrine Citrate)  
 D04 (Hydroxyamine)  
 A08 (Barbit)  
 C11 (L-Threonine)  
 B07 (DL-Lactamide)  
 E09 (D-Galactosamine)  
 D03 (Tyramine)  
 D08 (Methylamine)  
 E04 (Acetamide)  
 E03 (L-Phenylethylamine)  
 G04 (Ribose)  
 G05 (N-Amino-N-Capric Acid)  
 G19 (DL-L-Amino-Caprylic Acid)  
 F09 (Thymidine)  
 D04 (Ethylamine)  
 C05 (D-Acetic Acid)  
 C06 (D-Glutamic Acid)  
 D07 (N-Burhanine)  
 D06 (N-Arylamine)  
 D10 (Ethylacetamide)  
 C09 (D-Ureic)  
 B07 (L-Methionine)  
 G02 (Urea Acid)  
 B11 (L-Threonine)  
 R04 (Cytosine)  
 G11 (L-Amino-Valeric Acid)  
 G07 (DL-L-Amino-Butyric Acid)  
 E10 (D-Micrococcine)  
 E05 (Formamide)  
 H11 (Sily-Mel)  
 B02 (Oxamide)  
 A04 (Sodium Nitrate)  
 C04 (D-Asparagine)  
 A03 (Sodium Nitrate)  
 B04 (L-Isoalloxazine)  
 C08 (D-Serine)  
 F11 (Uridine)  
 F10 (Uracil)  
 F08 (Thymine)  
 B03 (L-Leucine)  
 C10 (L-Coumarin)  
 B08 (L-Phenylamine)  
 F04 (Cytosine)  
 F01 (N-Acetyl-b-D-Micrococcine)  
 C07 (D-Ureic)  
 E11 (N-Acetyl-D-Glucosamine)  
 G12 (L-Norvaline)  
 C12 (L-Cystine)  
 G04 (Pantothic Acid)  
 D06 (Glucosamine)  
 D08 (Ethylamine)  
 F03 (Quinine)  
 D01 (N-Acetyl-L-Glutamic Acid)  
 E01 (D-Glucosamine)  
 D02 (N-Phenyl-L-Glutamic Acid)  
 C01 (L-Tyrosine)  
 B06 (L-Ureic)  
 H03 (Sily-Cou)  
 C02 (L-Ureic)  
 A04 (L-Arginine)  
 D12 (Adonine)  
 A02 (Urea)  
 H07 (Methylamine)  
 A07 (L-Norvaline)  
 B03 (L-Histidine)  
 H05 (Methylamine)  
 B01 (L-Glutamine)  
 H02 (Methylamine)  
 H06 (Methylamine)  
 H07 (Methylamine)  
 A11 (L-Glutamic Acid)  
 E01 (Histamine)  
 A02 (Ammonia)  
 H12 (Methylamine)  
 H03 (Methylamine)  
 B09 (L-Proline)  
 A05 (L-Asparagine)  
 B10 (L-Serine)  
 A10 (L-Acetic Acid)  
 G06 (Alanine)  
 D11 (Phenolamine)  
 G08 (L-Amino-n-Butyric Acid)  
 H08 (Sily-Amin)  
 H04 (Methylamine)  
 H09 (Sily-Cou)  
 F03 (Methosine)  
 G01 (Methosine)  
 C03 (Formamide)  
 F07 (Guanosine)  
 C03 (D-Methosine)  
 F02 (Alanine)  
 F12 (Inosine)  
 D03 (L-Pyroglutamic Acid)

w 4  
 w 6  
 w 2  
 w 1  
 w 3  
 r 6  
 r 5  
 r 4  
 r 3  
 w 5  
 D 2  
 D 6  
 D 3  
 D 1  
 D 5  
 D 4  
 r 2  
 r 1  
 b 4  
 b 3  
 b 6  
 b 5  
 b 2  
 b 1

Color Key and Histogram

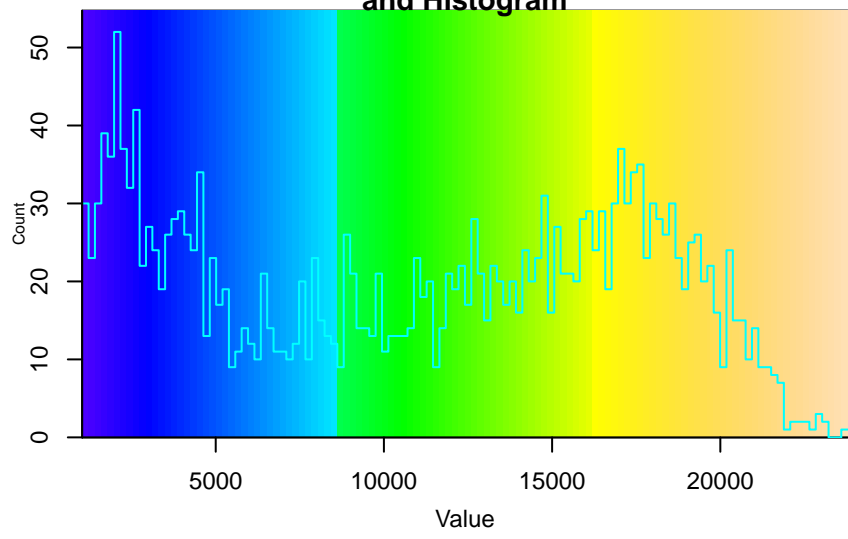

PM3 strain 2 -AUC

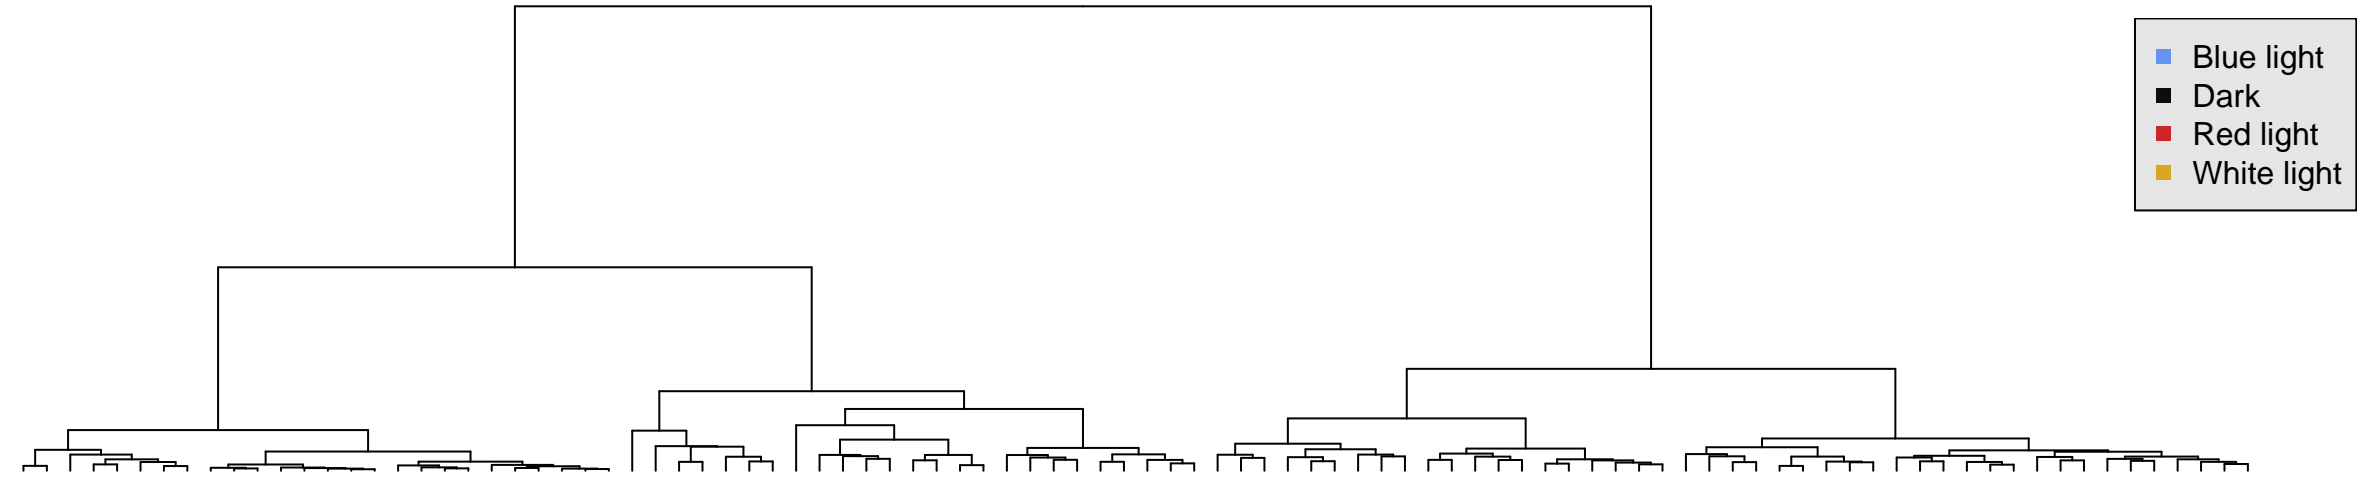

- Blue light
- Dark
- Red light
- White light

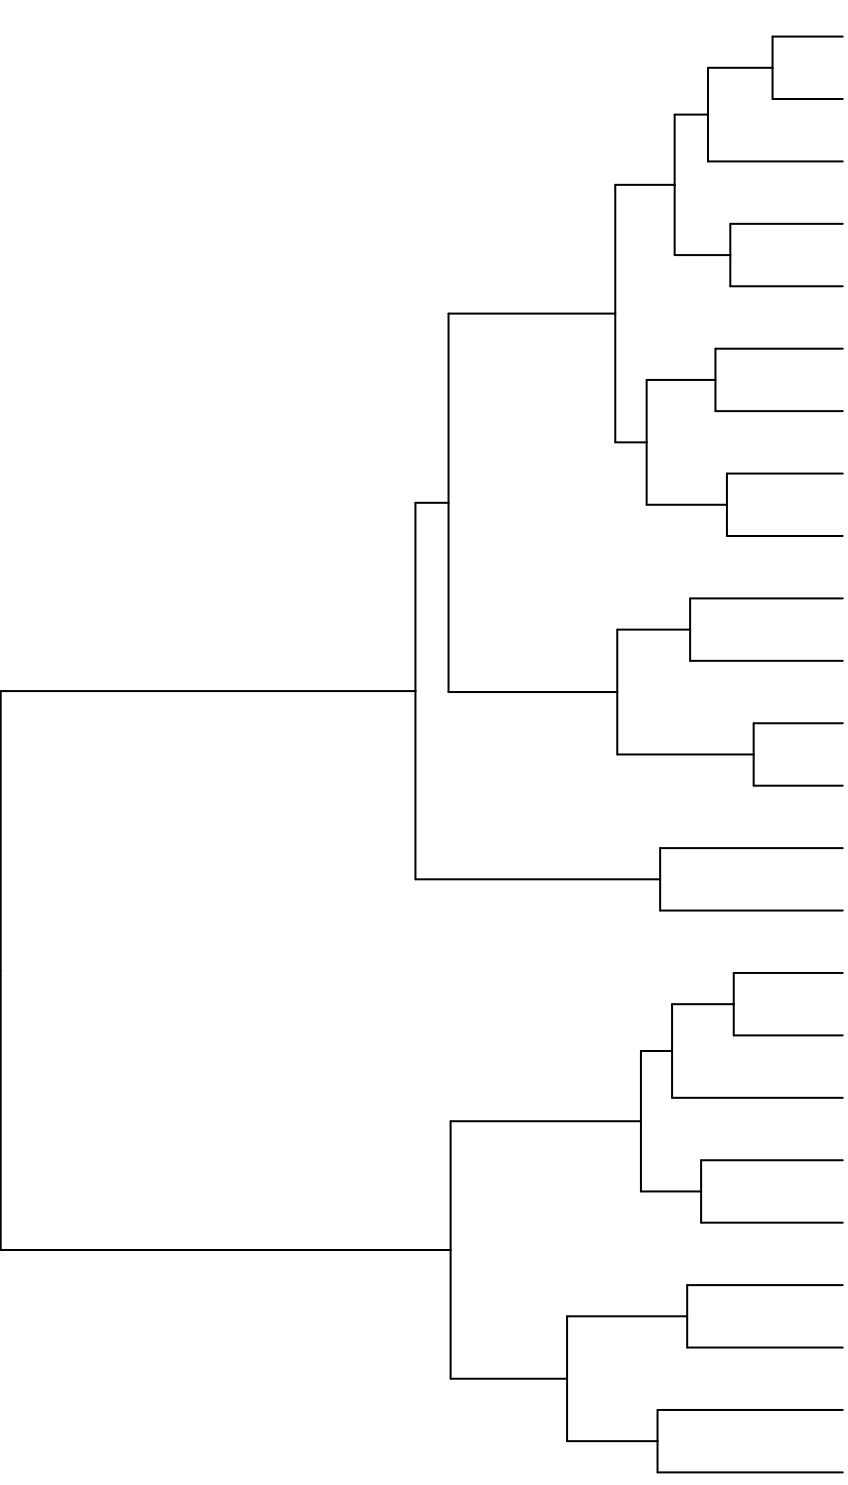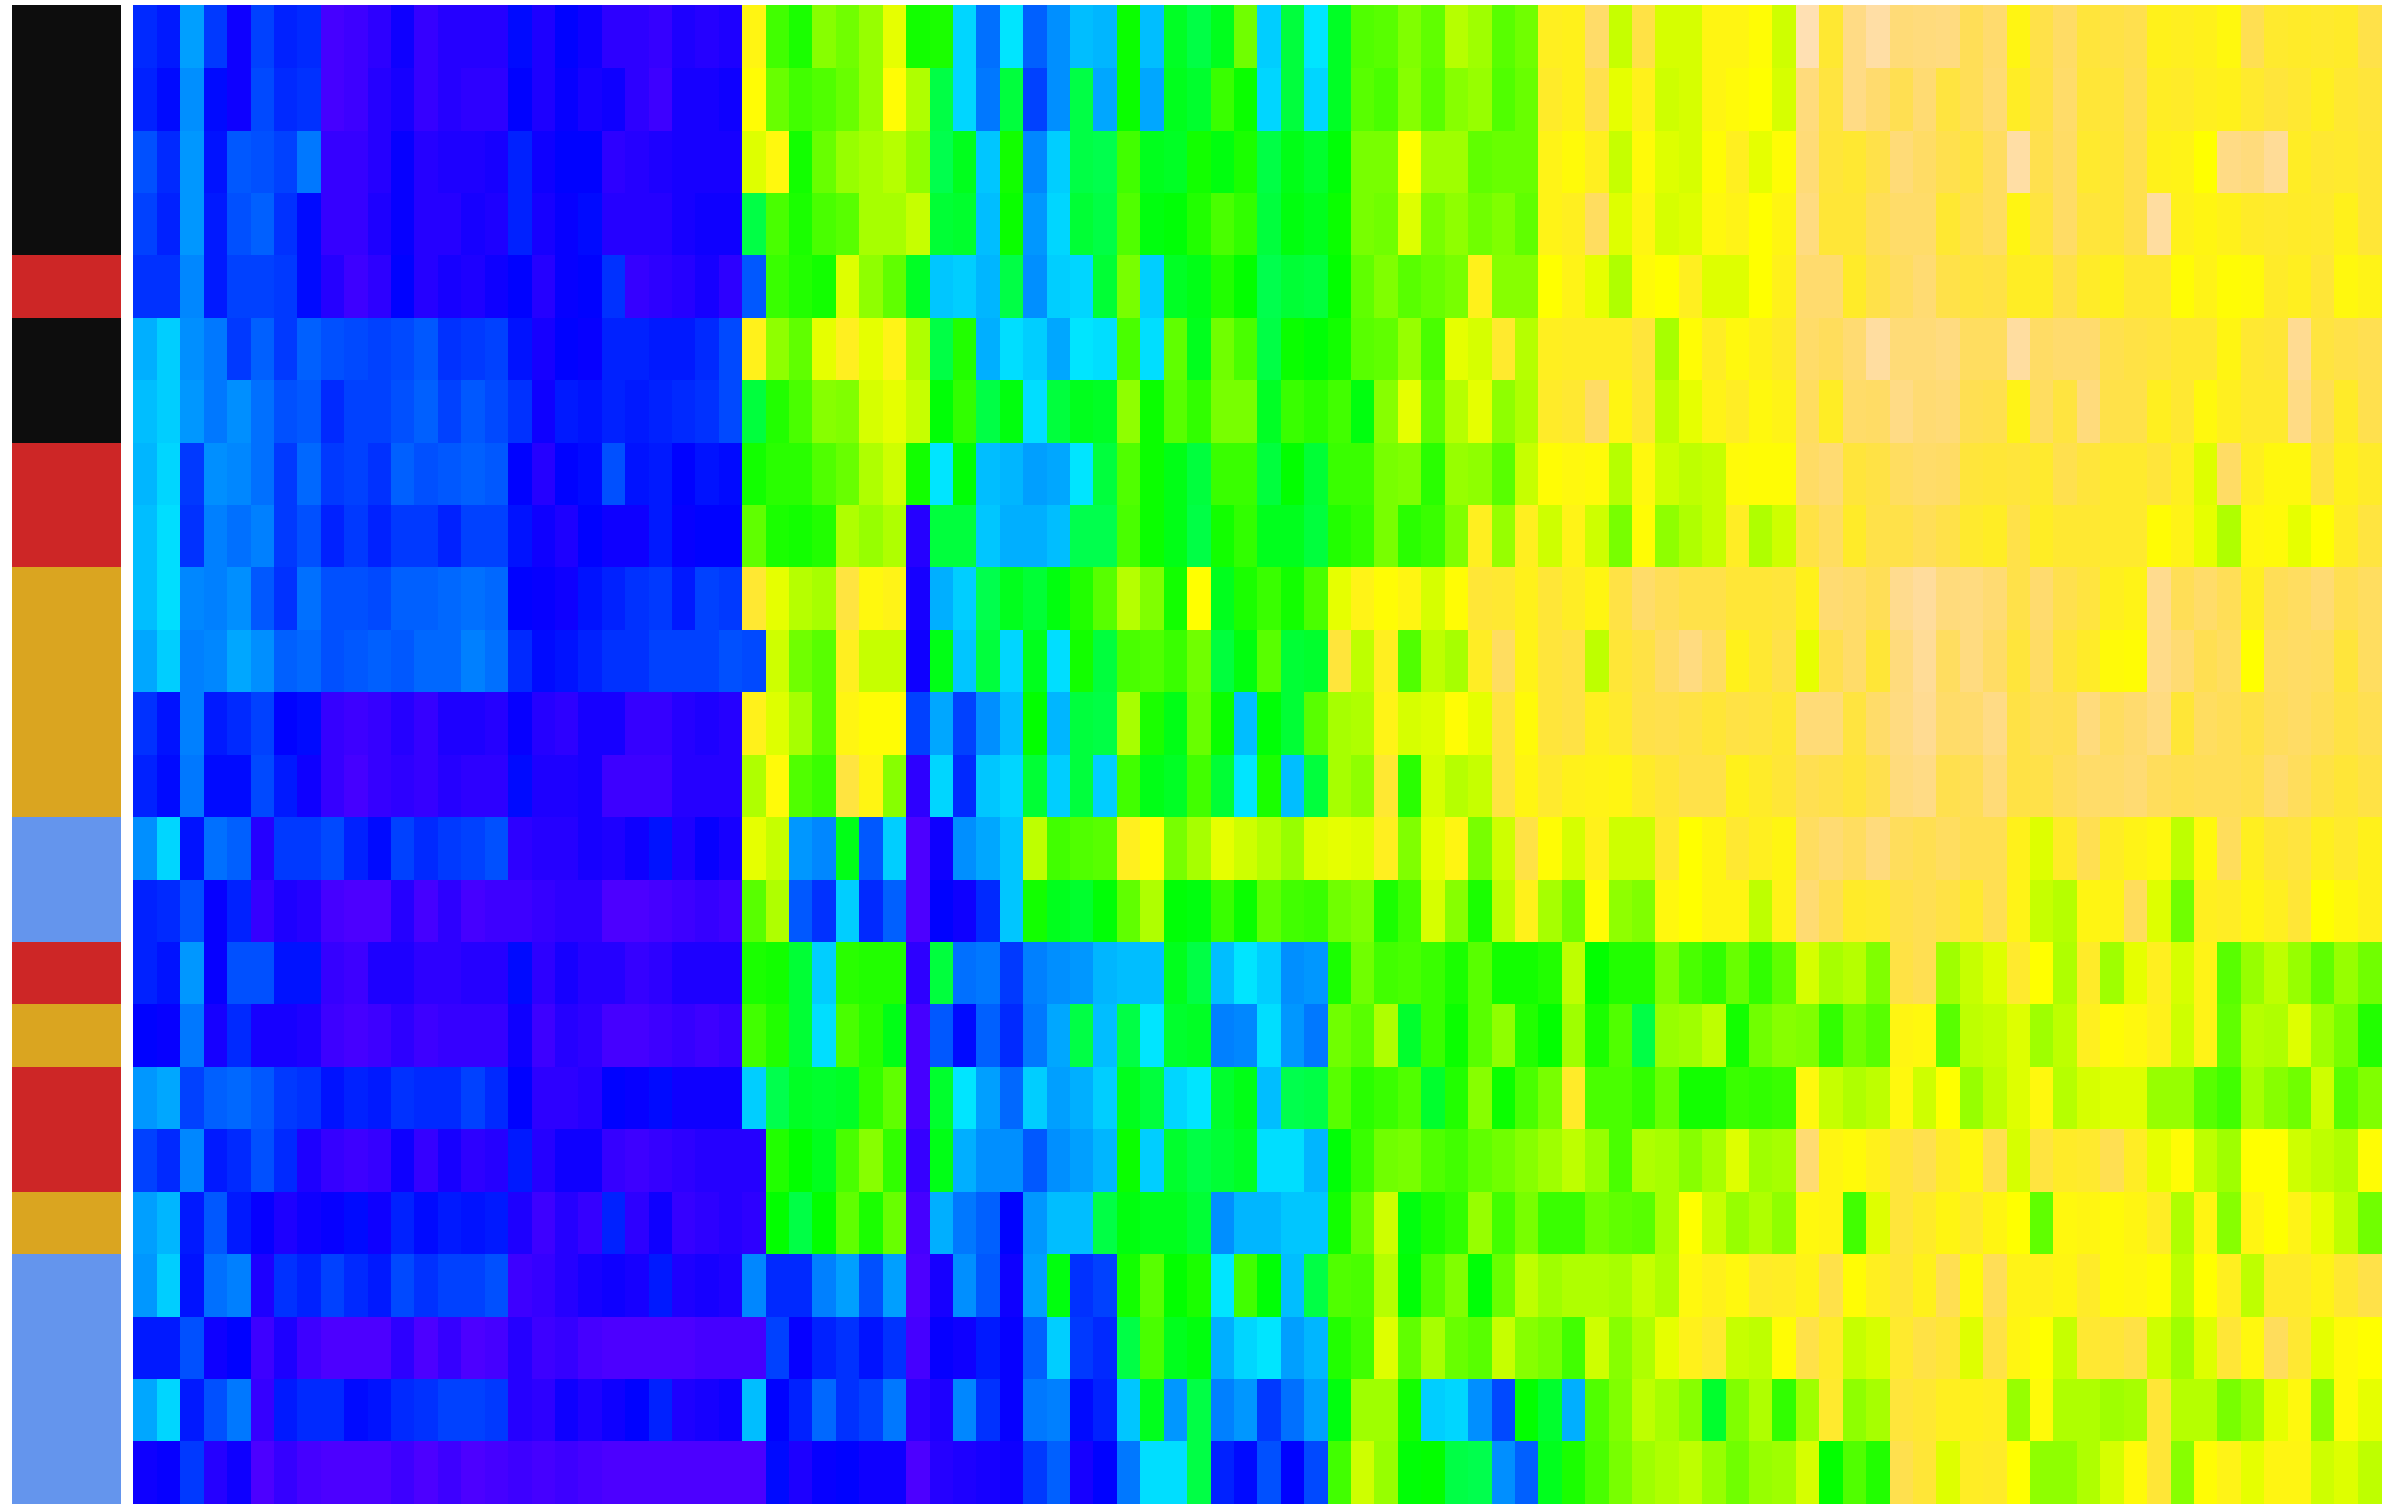

- D3
- D1
- D6
- D4
- r1
- D2
- D5
- r2
- r4
- w2
- w4
- w1
- w3
- b2
- b1
- r5
- w5
- r6
- r3
- w6
- b4
- b3
- b6
- b5

- A11 (L-Cysteine)
- B12 (L-Tyrosine)
- A01 (Negative Control)
- A08 (Benz)
- E12 (N-Acetyl-D-Galactosamine)
- G07 (DL-L-Asparto-Butyric Acid)
- E09 (D-Galactosamine)
- B07 (DL-Lactoside)
- D07 (N-Butyramine)
- C08 (D-Glutamic Acid)
- C05 (D-Aspartic Acid)
- C11 (L-Histamine)
- D06 (N-Arylamine)
- D10 (Ethylacetamide)
- B07 (L-Histamine)
- C09 (D-Valine)
- G04 (Albion)
- G09 (N-Amino-L-Caproic Acid)
- G10 (DL-L-Asparto-Caprylic Acid)
- F03 (Thymidine)
- D04 (Hydroxyacetone)
- D05 (Methylamine)
- D04 (Ethylamine)
- E04 (Acetamide)
- E03 (Tyramine)
- E05 (P-formamide)
- H11 (Gly-Met)
- C04 (D-Asparagine)
- A04 (Sodium Nitrate)
- B02 (Cysteine)
- B04 (L-Indole)
- A03 (Sodium Nitrate)
- R01 (Cysteine)
- B11 (L-Threonine)
- E10 (D-Methionine)
- G11 (DL-Amino-Valeric Acid)
- C06 (D-Serine)
- F11 (Uridine)
- F08 (Thymine)
- F10 (Uracil)
- B06 (L-Lysine)
- E11 (N-Acetyl-D-Glucosamine)
- F04 (Cytidine)
- F01 (N-Acetyl-D-Mannosamine)
- B03 (L-Leucine)
- B03 (L-Leucine)
- G12 (L-Norvaline)
- C10 (L-Cysteine)
- C07 (D-Lysine)
- E08 (D-Glucosamine)
- D01 (N-Acetyl-L-Glutamic Acid)
- D02 (N-Phenyl-L-Glutamic Acid)
- C01 (L-Tyrosine)
- H01 (Gly-Gly)
- C02 (L-Valine)
- E00 (Glucosamine)
- G06 (Palmitic Acid)
- C12 (L-Cysteine)
- D08 (Ethylamine)
- F01 (Guanine)
- B09 (L-Proline)
- F07 (Guanosine)
- G02 (Xanthosine)
- H01 (Ala-Ala)
- H01 (Ala-Gly)
- G05 (Alanine)
- D11 (Paracetamol)
- C03 (D-Norvaline)
- G08 (D-Amino-n-Butyric Acid)
- A01 (L-Arginine)
- D12 (Adenine)
- F02 (Adenine)
- A05 (Uracil)
- B01 (L-Glutamine)
- H02 (Ala-Gly)
- H02 (Ala-Ala)
- H03 (Ala-Gly)
- A12 (L-Glutamic Acid)
- H07 (Ala-Tyr)
- G01 (Methionine)
- B03 (L-Histidine)
- A07 (L-Alanine)
- A10 (L-Aspartic Acid)
- A09 (L-Asparagine)
- H03 (Ala-His)
- F03 (Adenosine)
- H06 (Ala-Leu)
- H08 (Gly-Ala)
- B10 (L-Serine)
- H09 (Gly-Gly)
- H12 (Ala-Ala)
- E01 (Methionine)
- D01 (D-Propanoic Acid)
- F12 (Methionine)

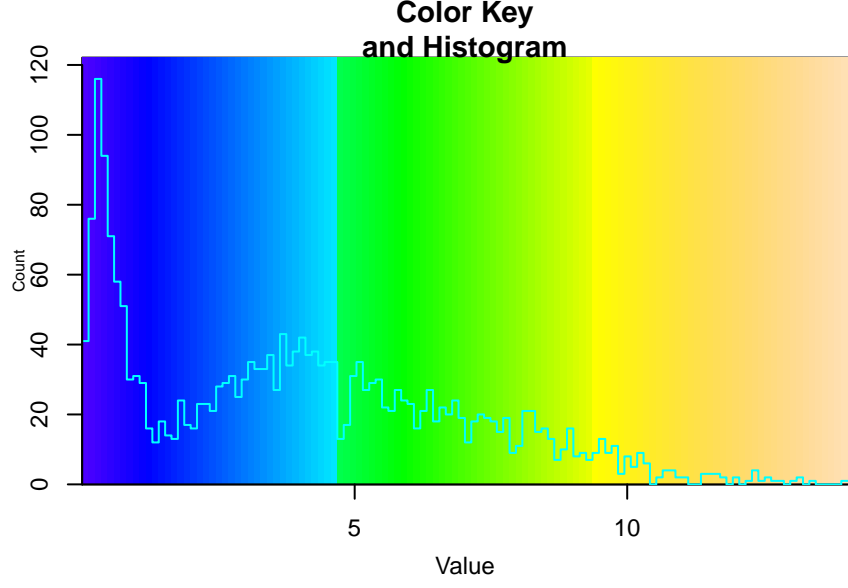

PM03 strain 2 -mu

- Blue light
- Dark
- Red light
- White light

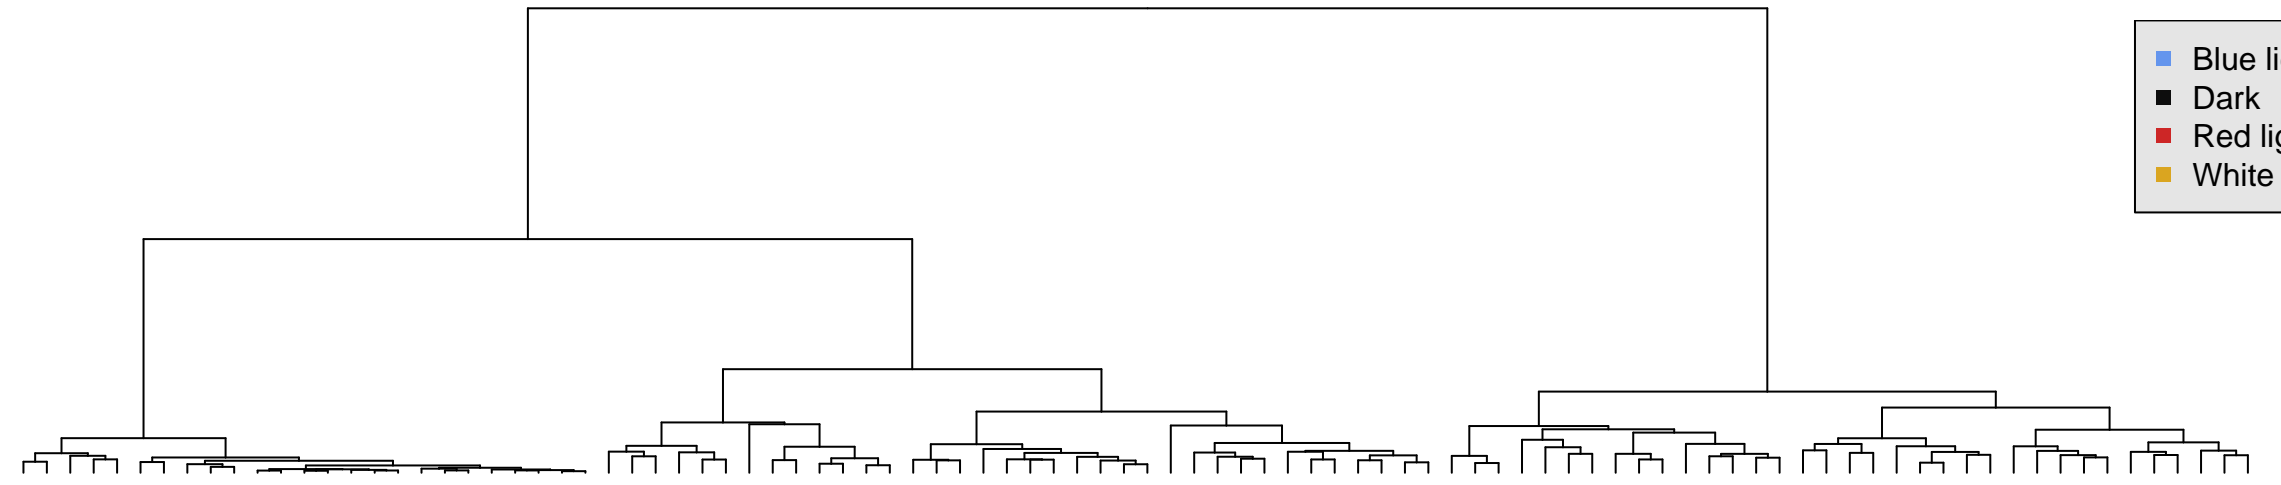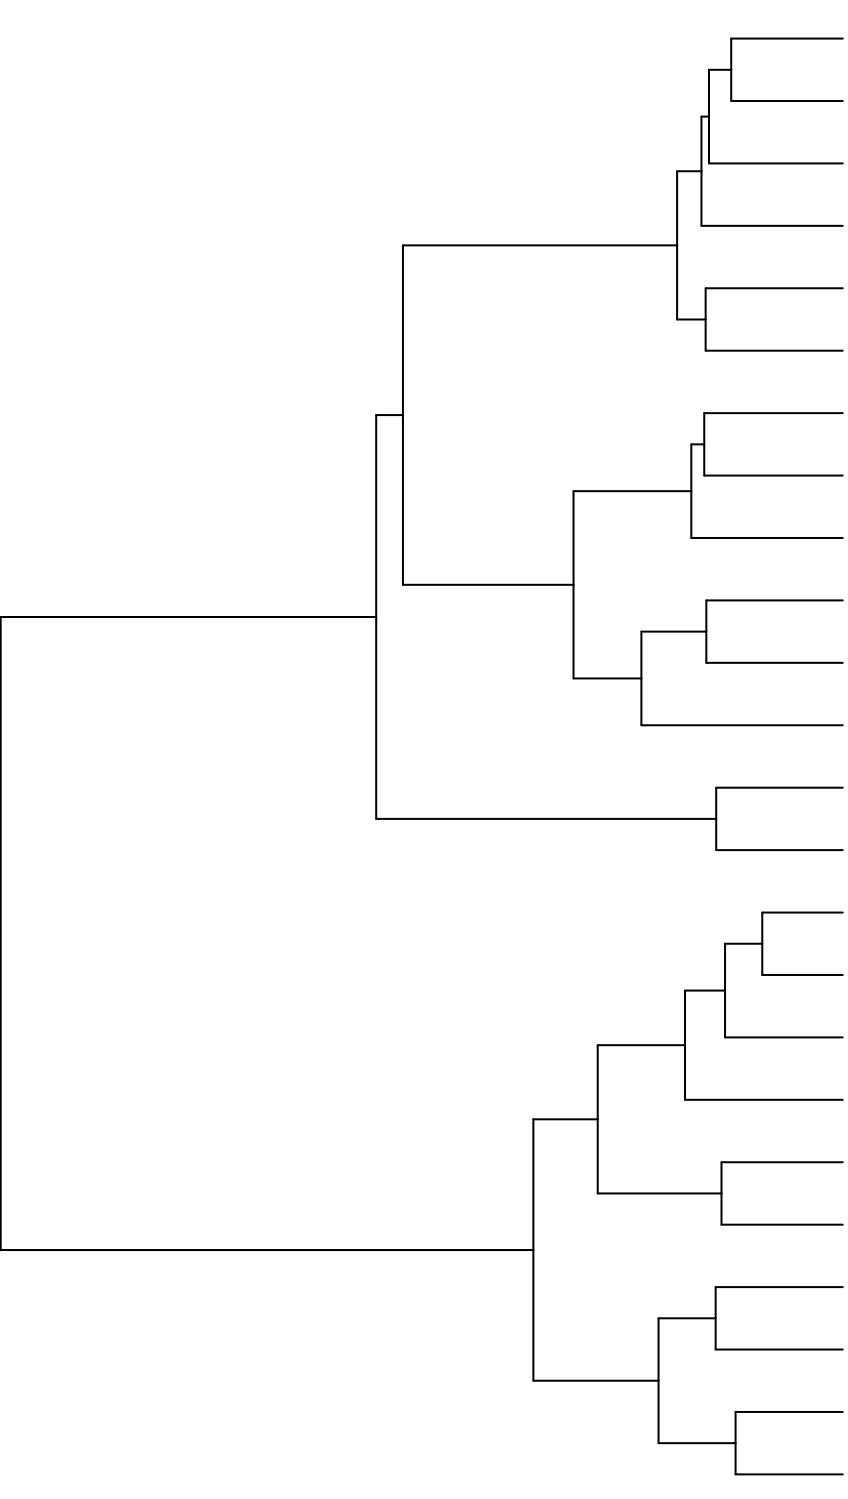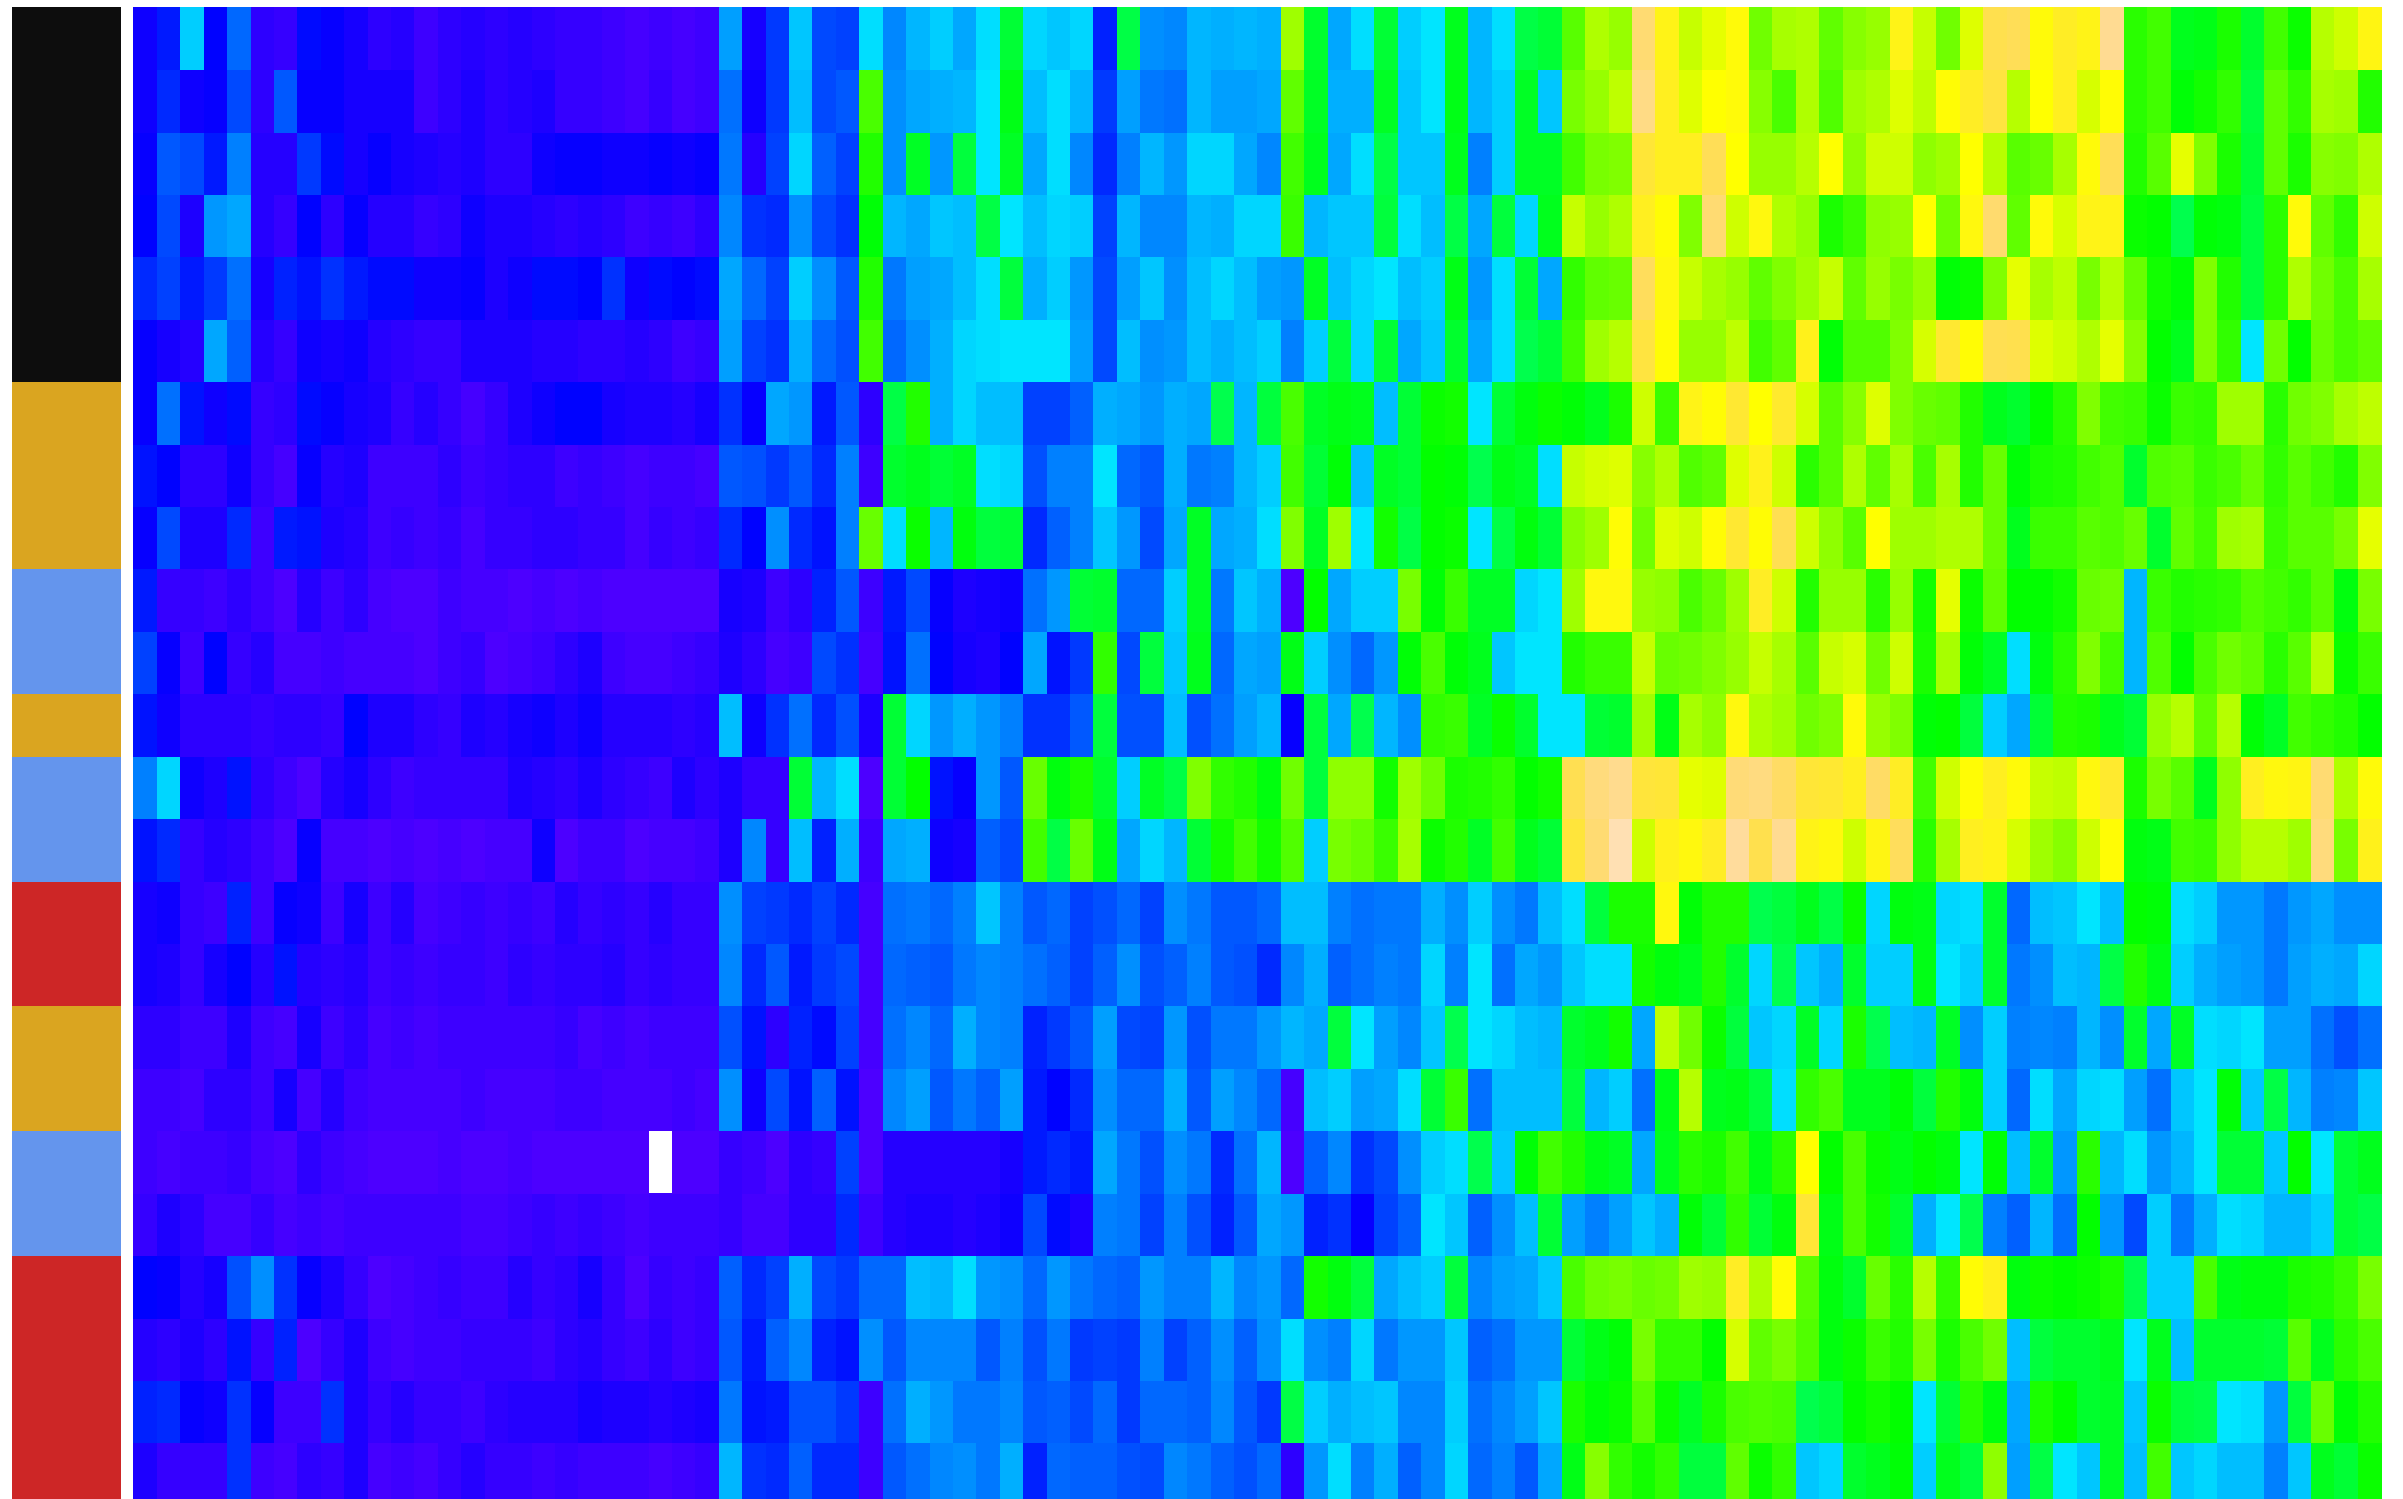

- E0 (D-Galactosamine)
- E07 (DL-Lactamide)
- A08 (Biotin)
- A11 (L-Cysteine)
- B11 (L-Threonine)
- C11 (L-Homoserine)
- D04 (Hydroxyproline)
- A01 (Negative Control)
- B12 (L-Tryptophan)
- G04 (Albustin)
- E02 (L-Phenylalanine)
- E04 (Asparagine)
- D05 (Methionine)
- D10 (Ethylmalonate)
- G10 (DL-α-Amino-β-Caprolactam Acid)
- D08 (L-Amino-N-Caprolactam Acid)
- F09 (Threonine)
- E03 (Tyrosine)
- B07 (L-Methionine)
- C09 (D-Ulauric)
- D06 (N-Arylglycine)
- C06 (D-Glutamic Acid)
- C05 (D-Aspartic Acid)
- D07 (N-Butyramine)
- D04 (Ethylmalonate)
- F05 (Cysteine)
- E10 (N-Acetyl-D-Galactosamine)
- G07 (DL-α-Amino-β-Butyric Acid)
- G11 (α-Amino-Valeric Acid)
- E10 (D-Malic Acid)
- C08 (D-Serine)
- G08 (L-Aspartic Acid)
- H11 (DL-Malic)
- B02 (Cysteine)
- A04 (Sodium Nitrate)
- B04 (L-Isoleucine)
- C04 (D-Asparagine)
- A03 (Sodium Nitrate)
- B05 (L-Leucine)
- B03 (L-Phenylalanine)
- C10 (L-Citrulline)
- G12 (L-Norvaline)
- C01 (L-Tyrosine)
- F11 (L-Asparagine)
- F04 (Cysteine)
- G07 (D-Tyrosine)
- F10 (Isoleucine)
- E11 (N-Acetyl-D-Glucosamine)
- F07 (N-Acetyl-β-D-Mannosamine)
- E05 (Formamide)
- E06 (Glucosamine)
- B06 (L-Lysine)
- F03 (Tyrosine)
- G12 (L-Cysteine)
- C02 (L-Ulauric)
- H01 (DL-Aspartic Acid)
- G05 (Methionine)
- F07 (Glutamine)
- H10 (DL-Serine)
- B10 (L-Aspartic Acid)
- A10 (L-Aspartic Acid)
- A05 (L-Asparagine)
- F02 (Asparagine)
- A07 (L-Norvaline)
- H06 (DL-L-Aspartic Acid)
- H07 (DL-Tyrosine)
- H02 (DL-Aspartic Acid)
- H09 (DL-Cysteine)
- H03 (DL-Cysteine)
- B01 (L-Glutamic Acid)
- H05 (DL-Histidine)
- H12 (DL-Methionine)
- F01 (Methionine)
- H02 (DL-Cysteine)
- A12 (L-Glutamic Acid)
- E01 (Methionine)
- B03 (L-Histidine)
- D12 (Asparagine)
- A04 (L-Asparagine)
- B04 (L-Proline)
- D11 (Phenylalanine)
- D09 (Ethylmalonate)
- D02 (L-Phenylalanine Acid)
- A02 (Urea)
- F03 (Glutamine)
- G01 (Methionine)
- G06 (Phenylalanine Acid)
- G08 (β-Amino-n-Butyric Acid)
- H04 (DL-Cysteine)
- D02 (N-Phenyl-β-L-Aspartic Acid)
- C03 (D-Methionine)
- H08 (DL-Aspartic Acid)
- F12 (Proline)
- G02 (Zinc Oxide)
- AS2 (Ammonia)

- D3
- D1
- D2
- D6
- D5
- D4
- w2
- w3
- w1
- b3
- b4
- w4
- b2
- b1
- r5
- r6
- w5
- w6
- b5
- b6
- r1
- r2
- r4
- r3

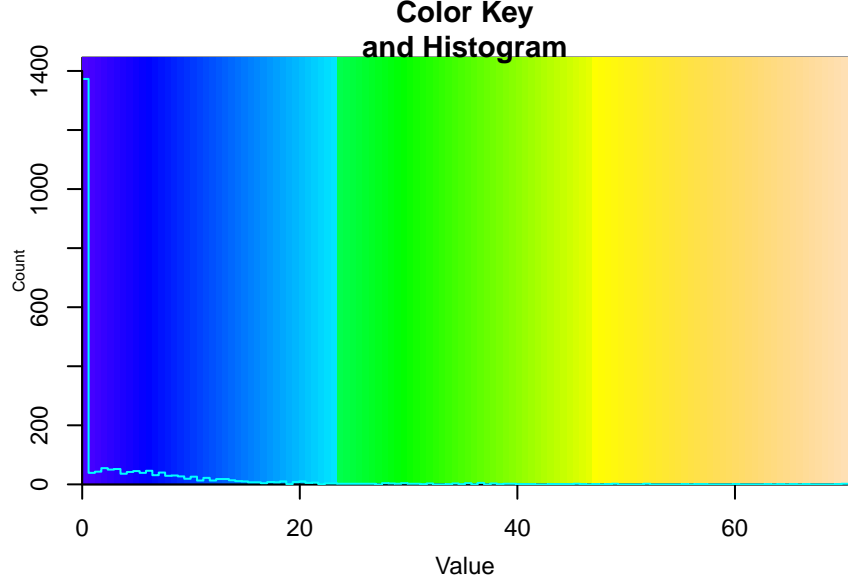

### PM03 strain 2 -lambda

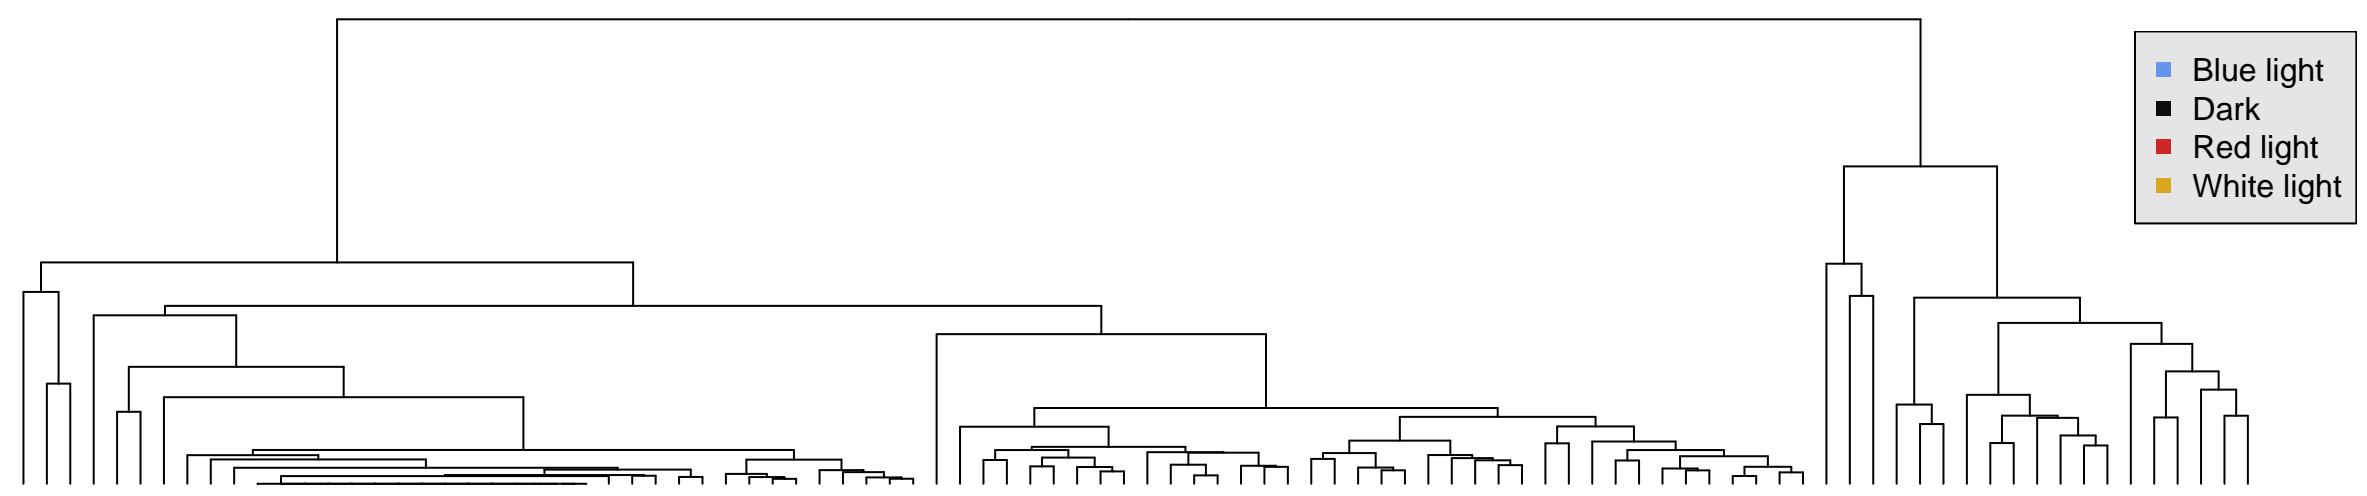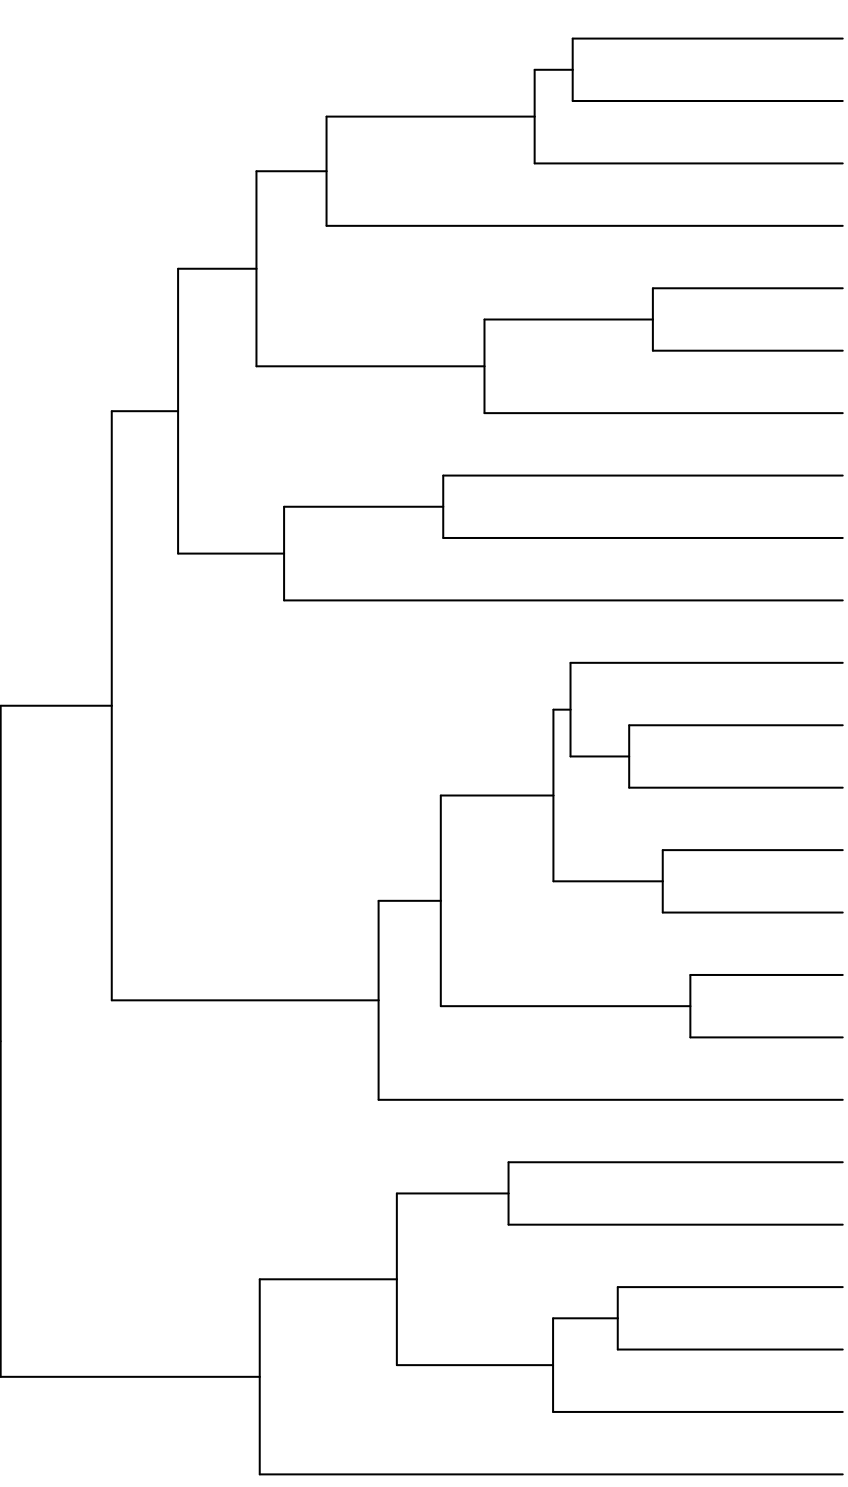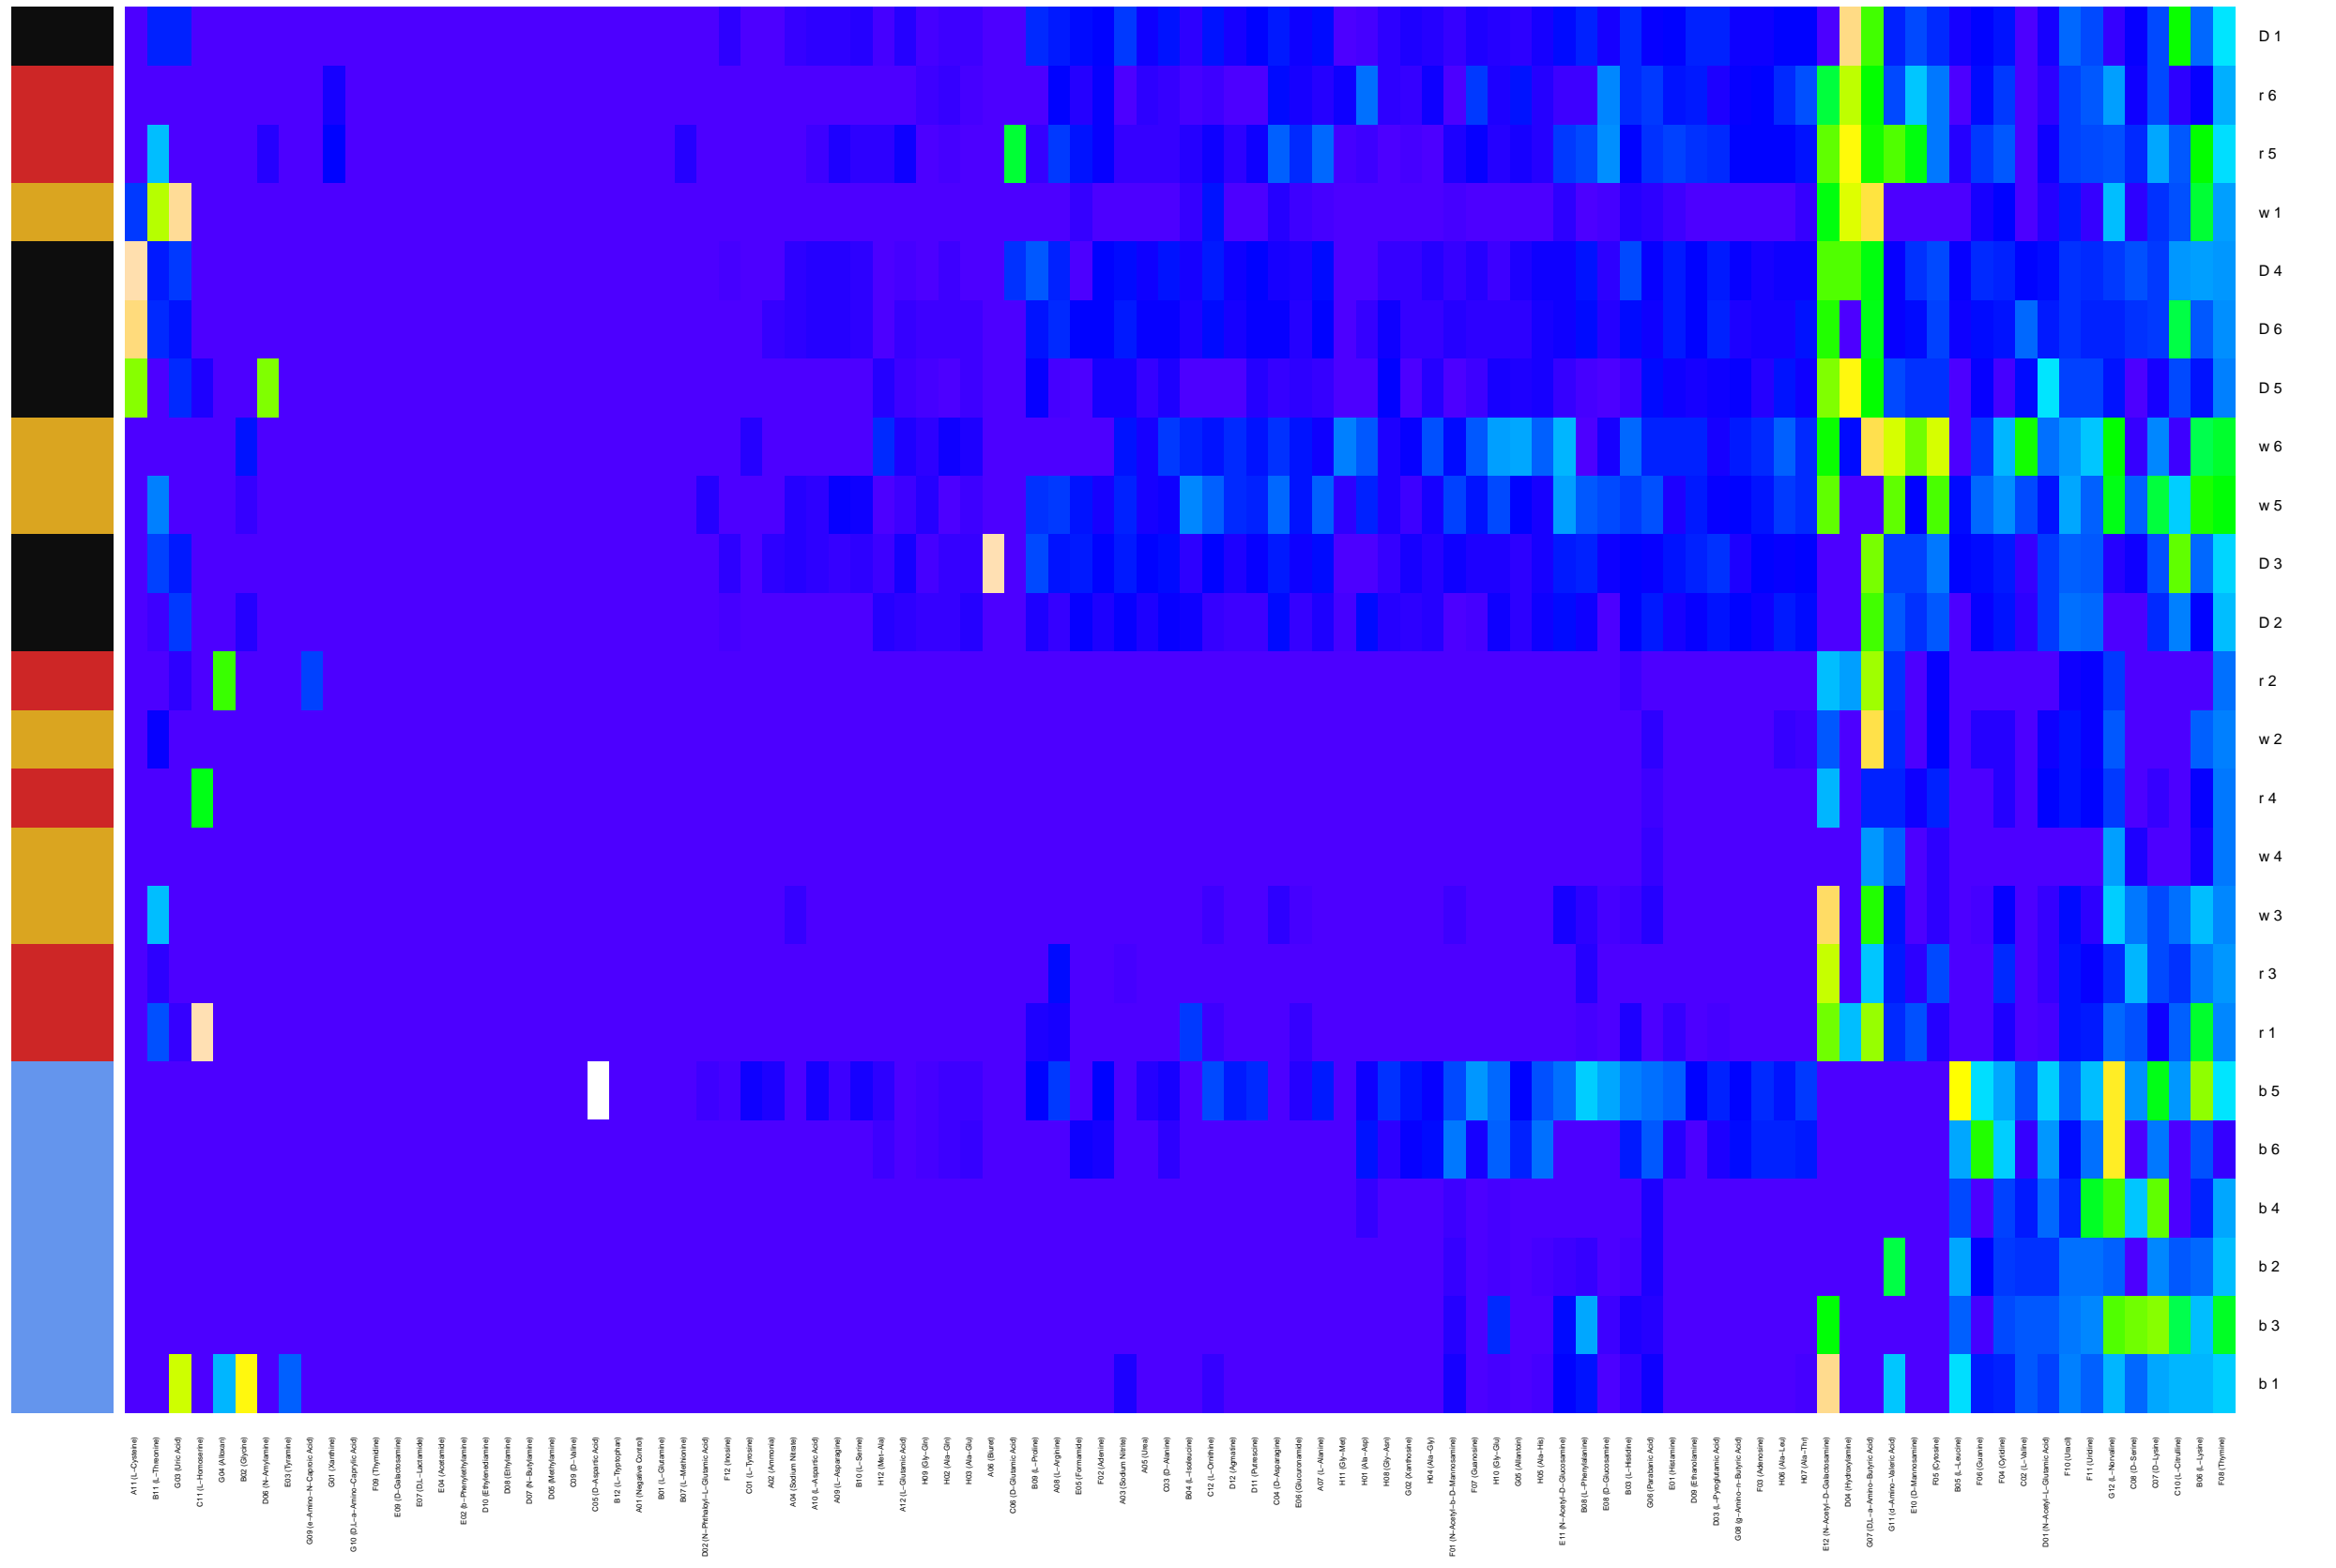

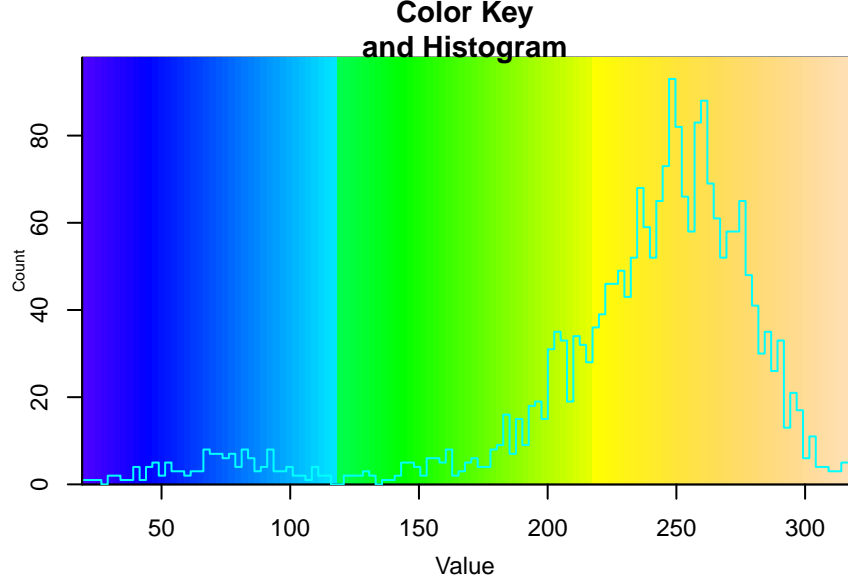

### PM04 strain 2 -A

- Blue light
- Dark
- Red light
- White light

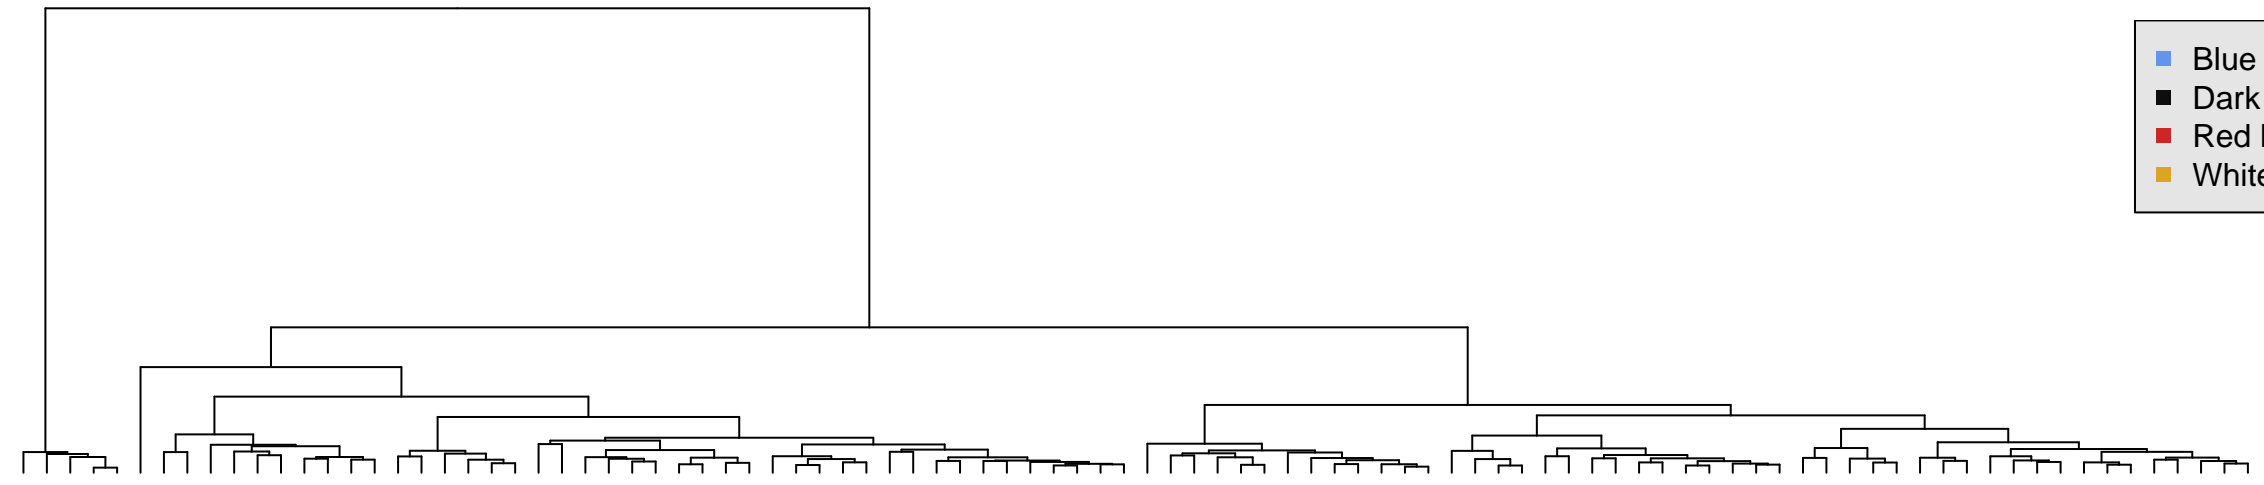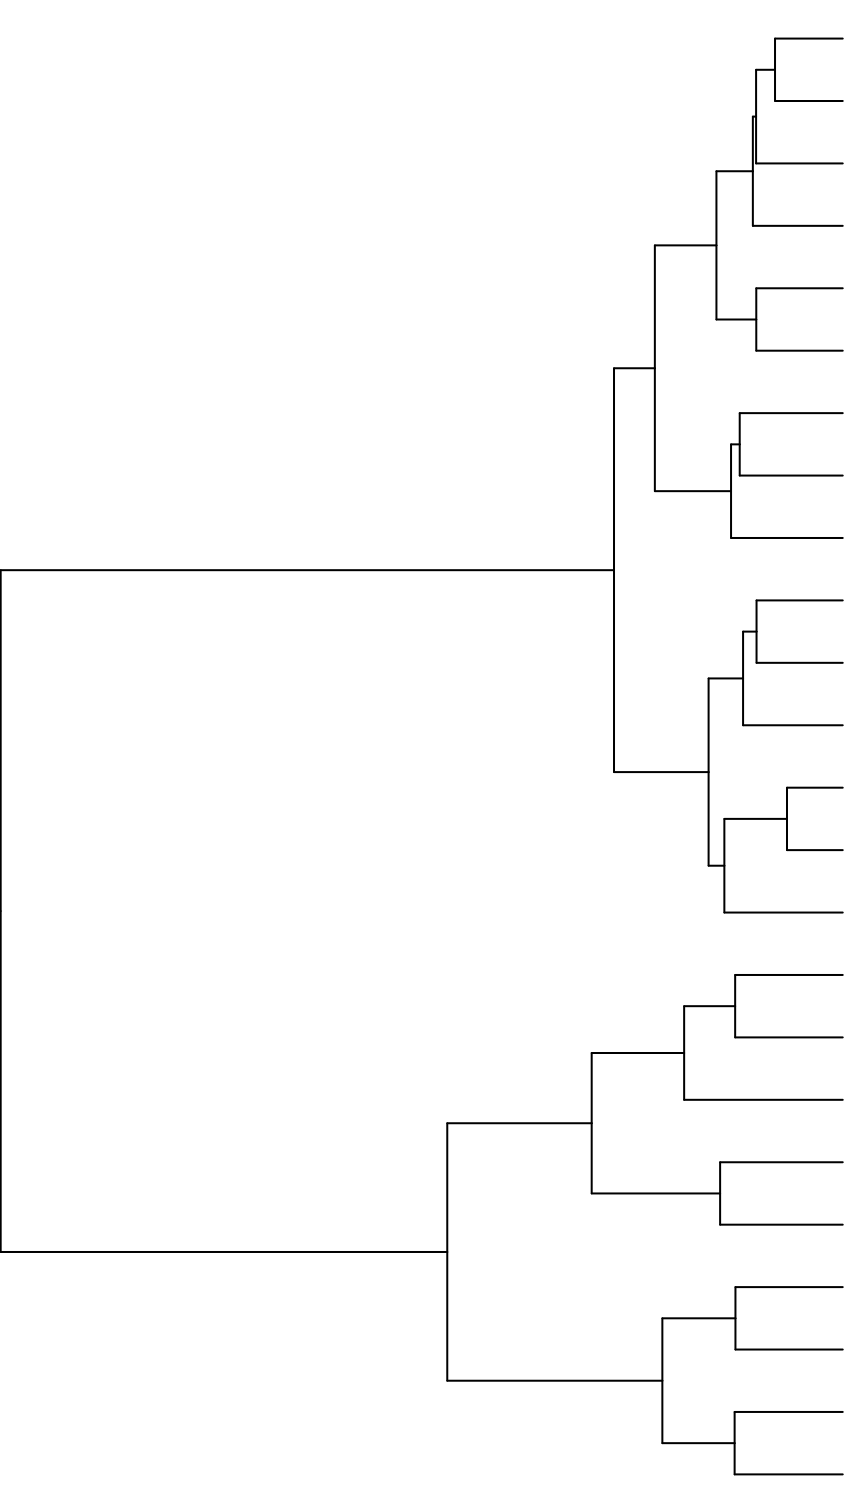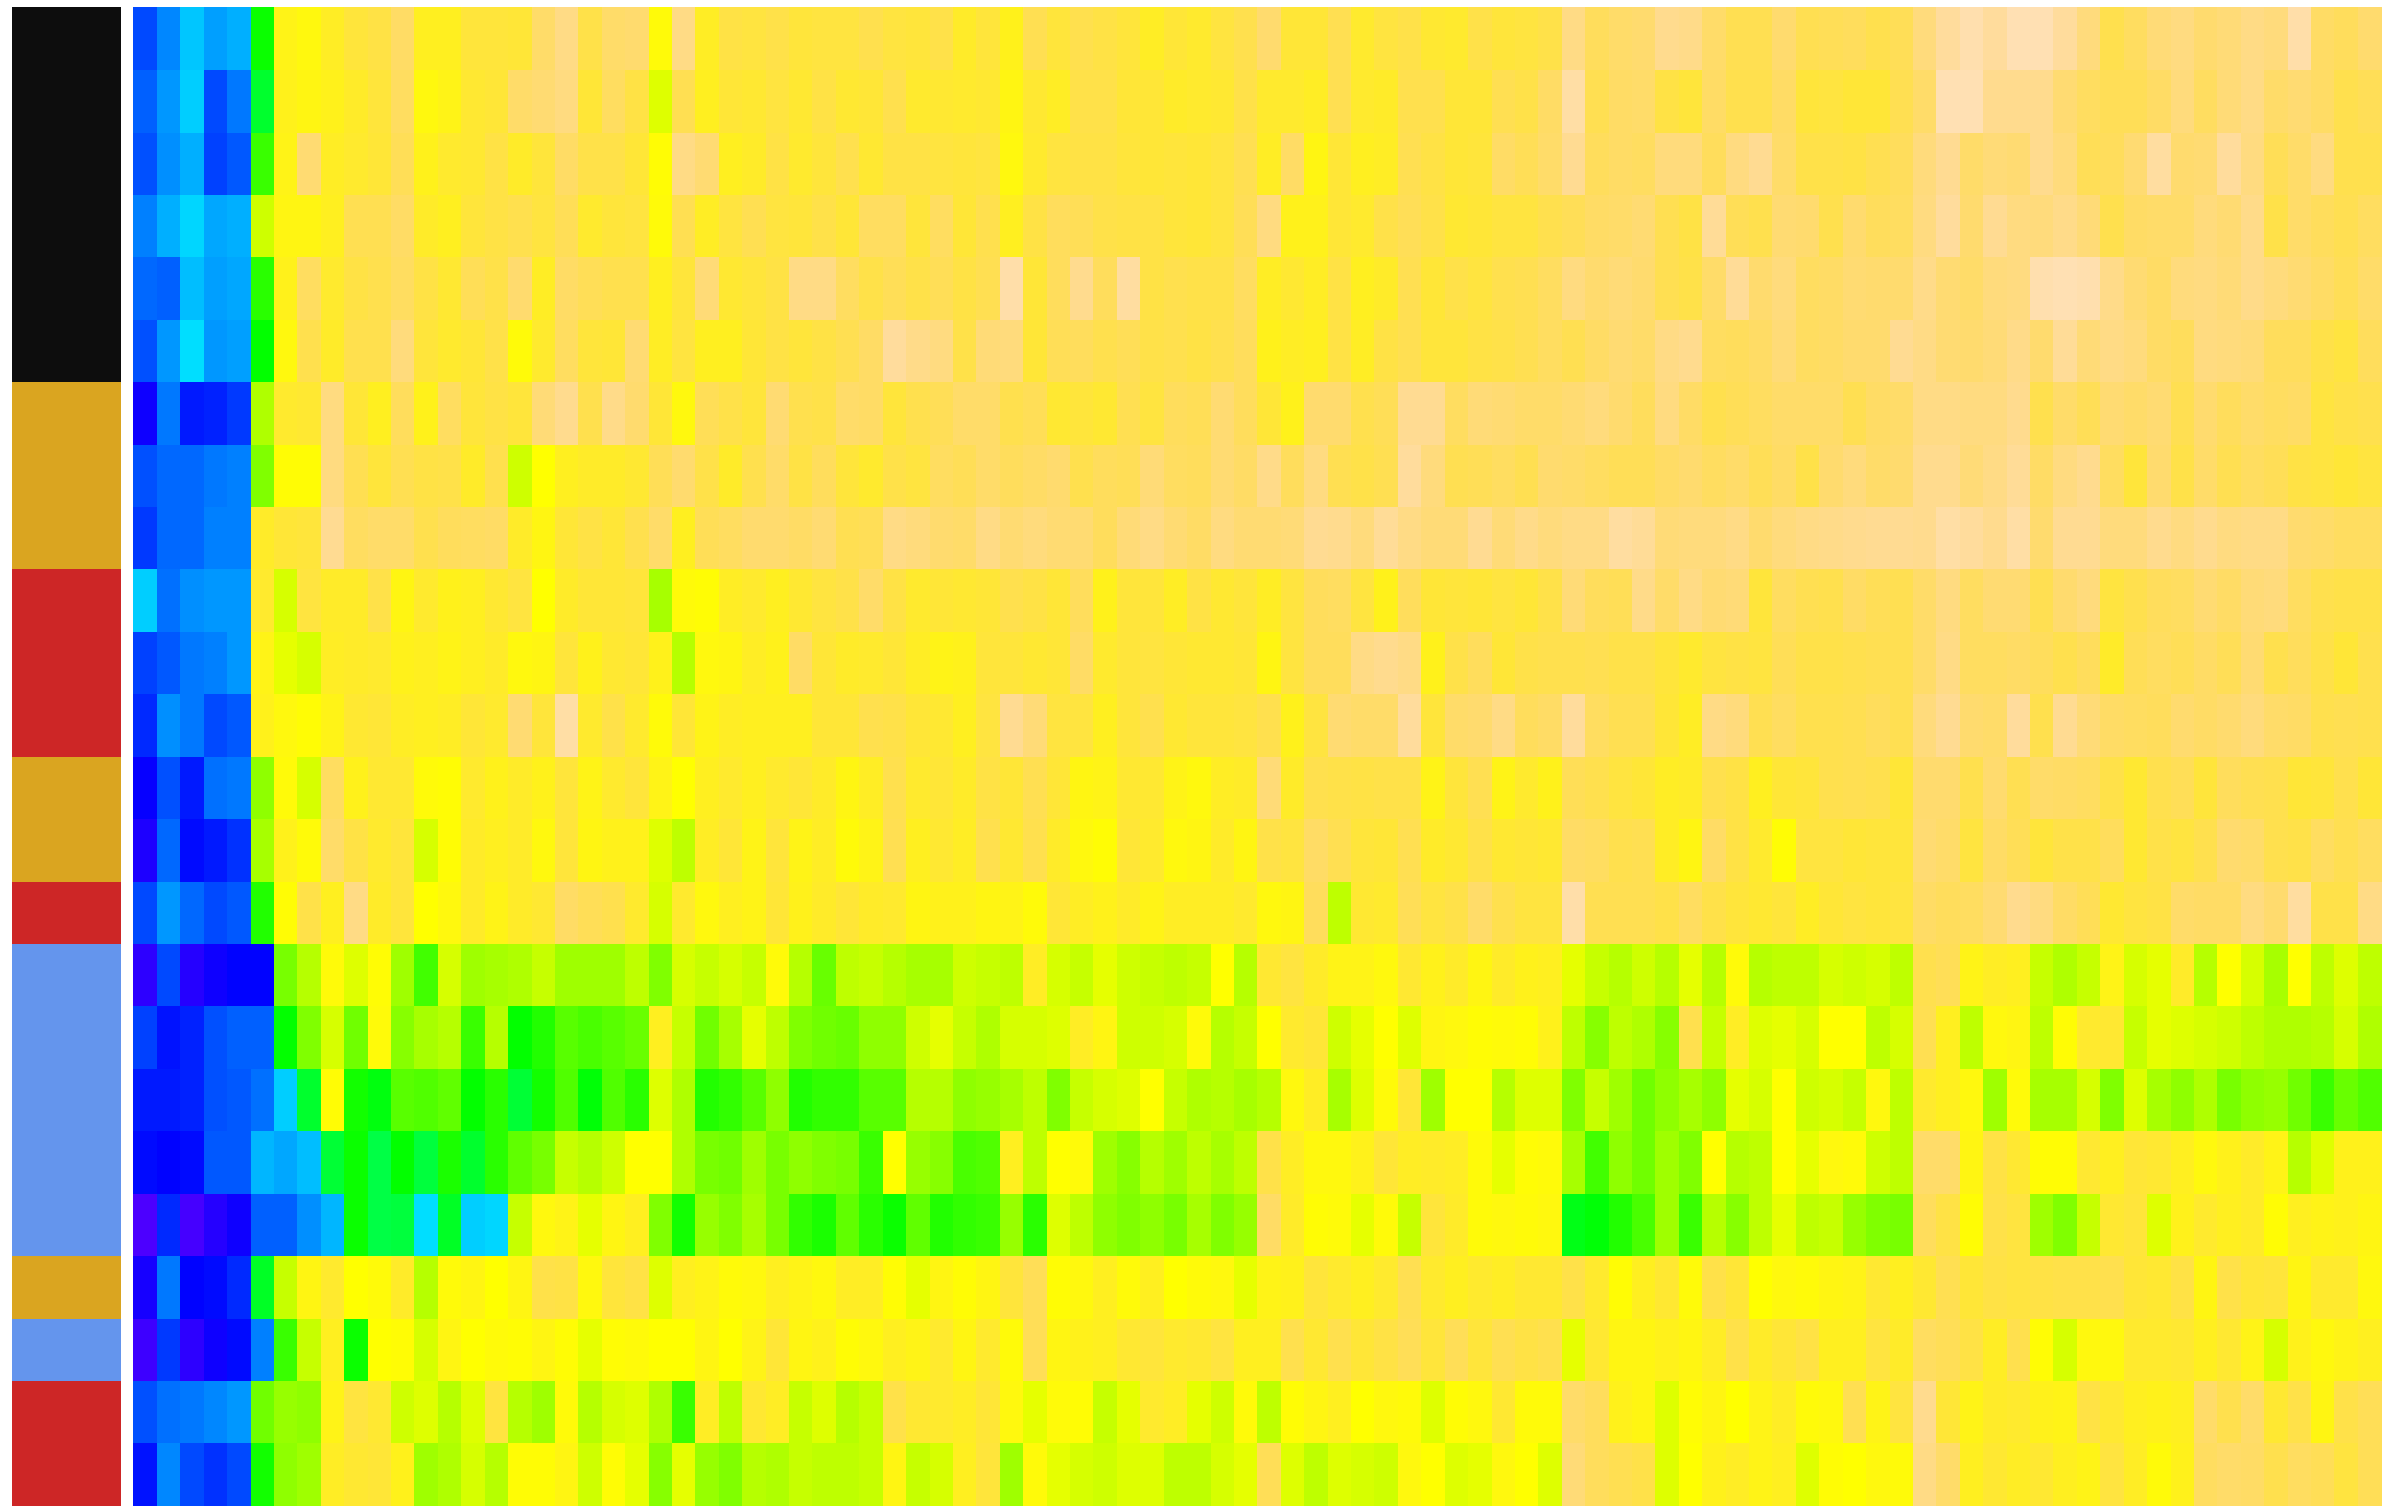

- E06 Methoxy Salicylic Acid
- A01 (Negative Control F1)
- E03 (Phospho) Acids Acid
- A07 Hydroxyphenol
- A08 (Methyl) Phosphate
- E11 (Inhibitor) Hexaphenol
- C10 (Cyclic-5-Monophosphate)
- E11 (Cyclic-2,3-Cyclic Monophosphate)
- D03 Cytosamine-3-Phosphate
- D07 (O-Phospho-L-Threonine)
- E09 Phosphoglycerate
- C08 (Cyclic-2-Monophosphate)
- F10 L-Cysteic Acid
- D11 (Uridine-2,3-Cyclic Monophosphate)
- F12 (Cyclic-3-Cyclic Monophosphate)
- E08 (Thymidine-3-Monophosphate)
- (Guanosine-3,5-Cyclic Monophosphate)
- (Adenosine-2,3-Cyclic Monophosphate)
- A08 (Adenosine-2-Monophosphate)
- B10 (Guanosine-5-Monophosphate)
- A08 (Adenosine-5-Monophosphate)
- A10 (Adenosine-5-Monophosphate)
- F11 Cytosine
- D01 (D-Mannose-1-Phosphate)
- D10 (Uridine-5-Monophosphate)
- C08 (Cyclic-3-Monophosphate)
- E10 (Thymidine-5-Monophosphate)
- D08 (Uridine-2-Monophosphate)
- D12 (Uridine-3,5-Cyclic Monophosphate)
- Z (Thymidine-3,5-Cyclic Monophosphate)
- (Guanosine-2,3-Cyclic Monophosphate)
- B08 (Guanosine-3-Monophosphate)
- E08 (Guanosine-5-Ethanolamine)
- F08 (Cyt-DV)
- F09 (Guanosine)
- D05 (Uridine-3-Monophosphate)
- F08 (Thiopyridine R2)
- A04 (Thiamine) Phosphate
- H02 (Thiourea)
- E08 (2-Phospho-L-Tyrosine)
- G11 (L-Alanine) Sulfonate
- G12 (L-Methionine) Sulfonate
- G01 (Cysteine)
- G08 (D,L-Ethanol)
- F08 (D-Cysteine)
- G10 (N-Acetyl-DL-Methionine)
- G06 (Guanosine)
- F07 (L-Cysteine)
- B07 (Phosphoglycerate F1)
- H11 (Tetramethylene Sulfone)
- H04 (DL-Liponate)
- H05 (Thiopyridine Acid)
- F01 (Negative Control R2)
- G01 (N-Acetyl-L-Cysteine)
- H11 (L-Dipicolic Acid)
- (Adenosine-3,5-Cyclic Monophosphate)
- H08 (D-Amino Benzoic Sulfonate Acid)
- H03 (L-Tyrosine-D-Glucose)
- H10 (D-Hydroxyurea Sulfonate Acid)
- H09 (Sulfate Sulfonate Acid)
- H11 (Methoxy Sulfonate Acid)
- C02 (Phospho-Glycerate Acid)
- D04 (Phospho-L-Histidine)
- D05 (D-Phospho-D-Serine)
- C05 (D-Threonyl-D-Glucose-6-Phosphate)
- B08 (Guanosine-2-Monophosphate)
- B05 (Catalase) Phosphate
- B04 (D-Glyceral Phosphate)
- F12 (L-Cysteine) Sulfonate Acid
- G08 (D)-Met
- G07 (L-Methionine)
- G04 (Lactonate)
- R03 (Sulfate Thiopyridine)
- F02 (Sulfate)
- G02 (S-Methyl-L-Cysteine)
- F08 (Dihydroxyphenyl R2)
- E04 (Phosphoglycerate)
- C01 (Phospho) Pyruvate
- H03 (Thiourea)
- B07 (D,3-Phospho-Glycerate Acid)
- H07 (Tyrosine)
- A03 (Sodium) Pyrophosphate
- A05 (Thiopyridine)
- A02 (Sulfate) Phosphate
- B02 (Dihydroxyphenyl F1)
- C08 (D-Methionine)
- E01 (O-Phospho-D-Tyrosine)
- B06 (D,2-Phospho-Glycerate Acid)
- E07 (L-Aminomethyl) Phosphonic Acid
- C04 (D-Glucose-6-Phosphate)
- C07 (L-Phospho-Glycerate Acid)
- E03 (D,L-L-Glutamic-6-Phosphate)
- C03 (L-D-Glucose-1-Phosphate)
- D02 (D-Mannose-6-Phosphate)
- D06 (D-Phospho-L-Serine)

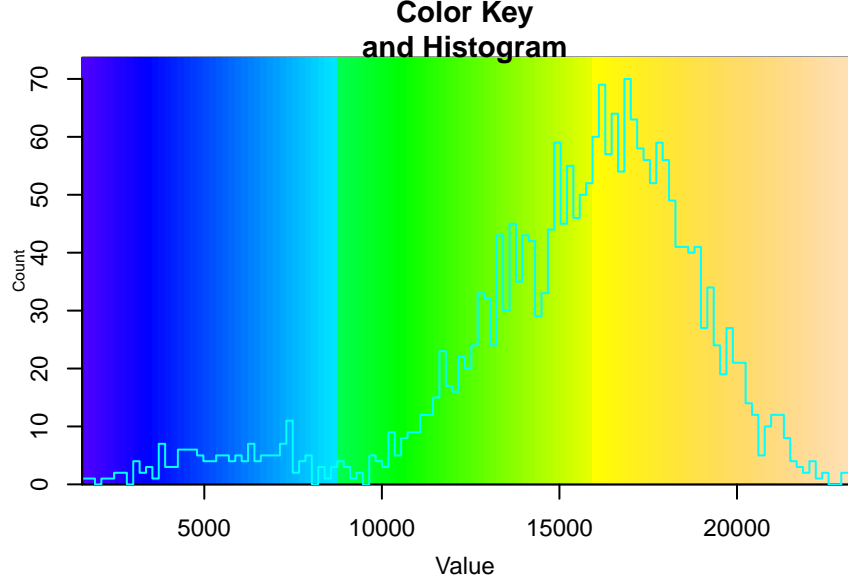

### PM04 strain 2 -AUC

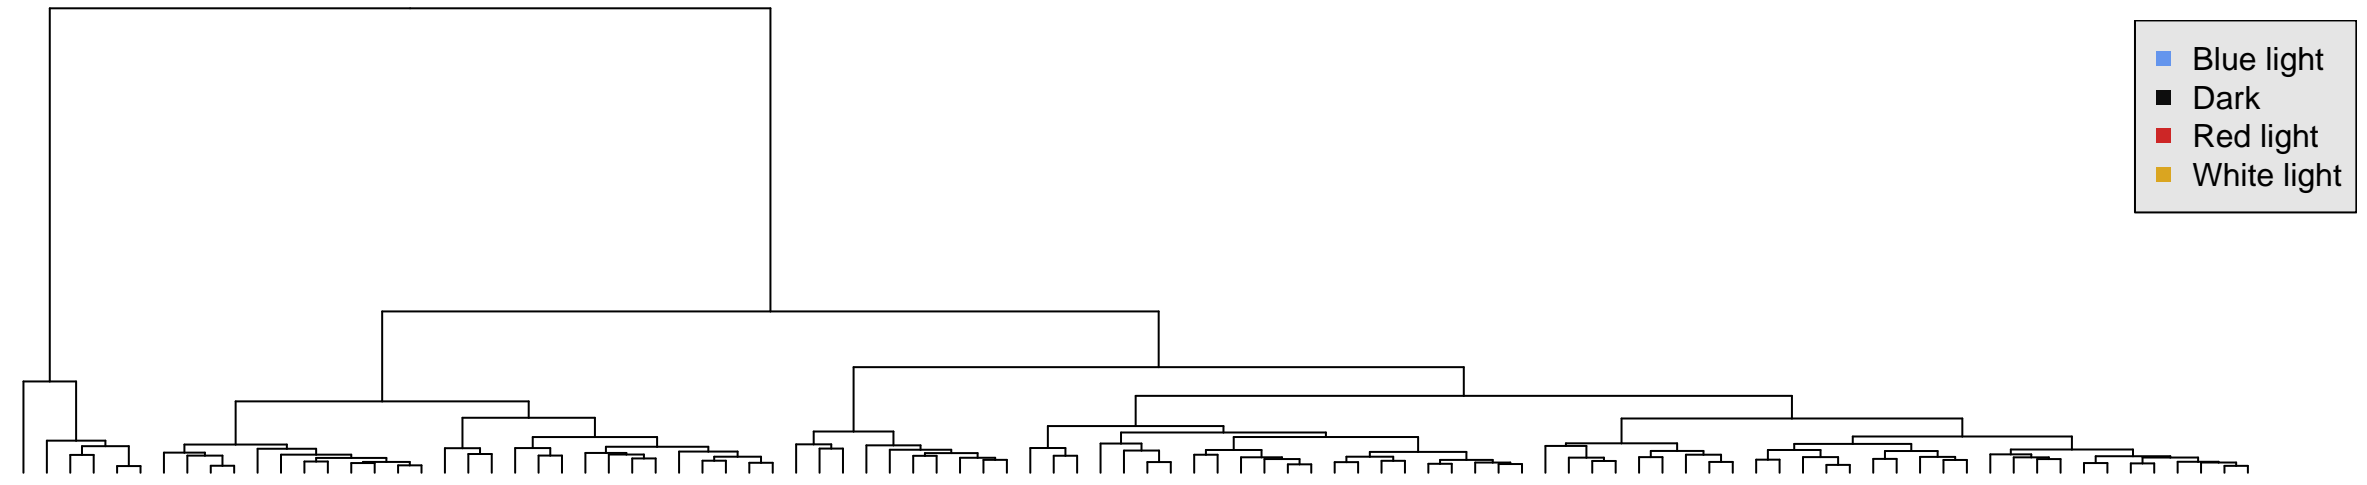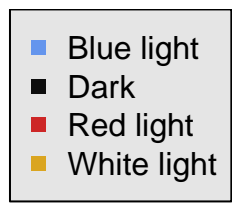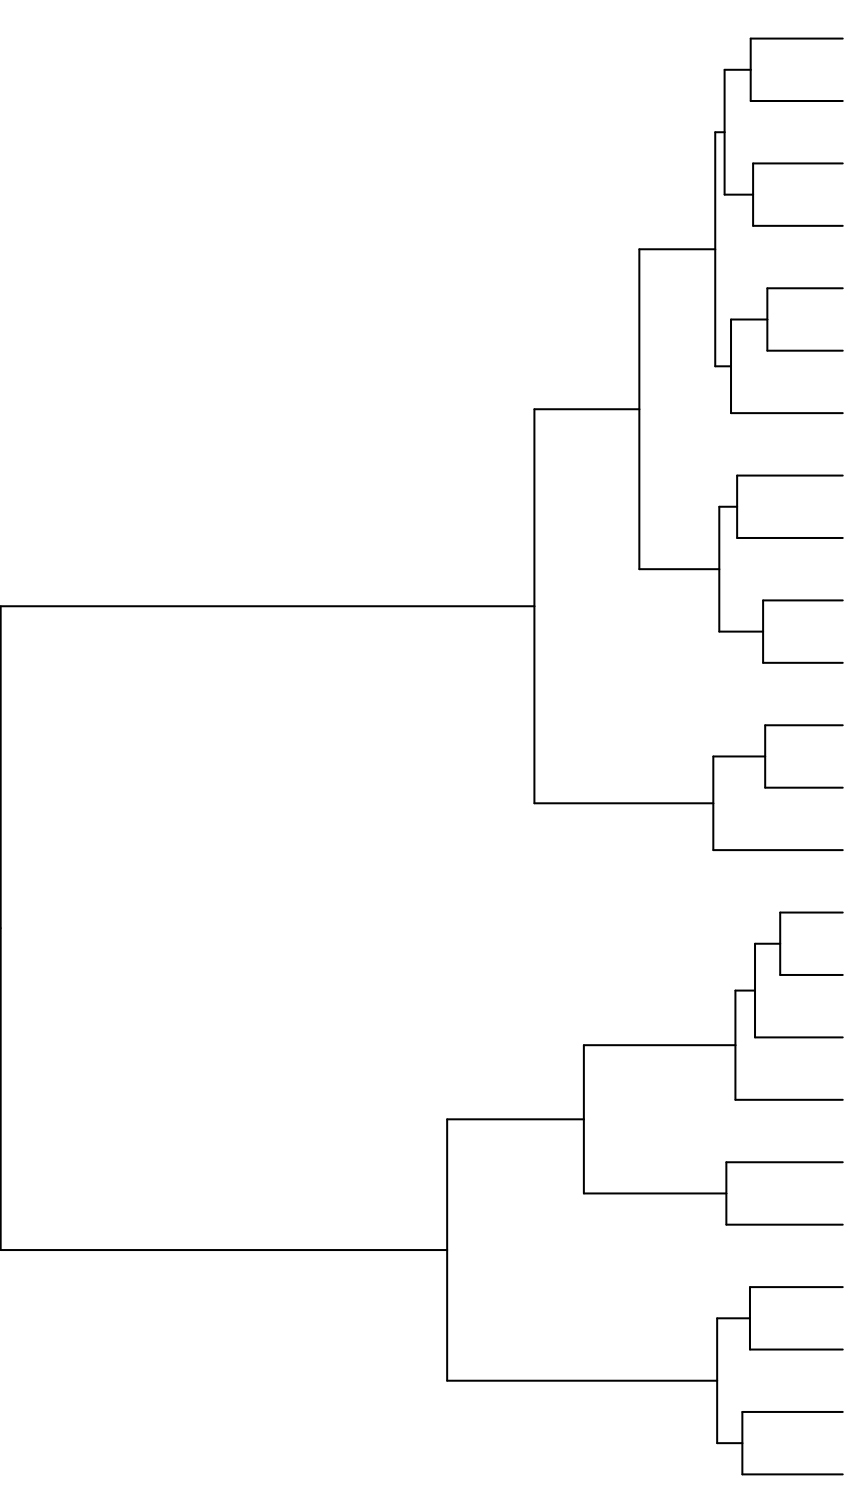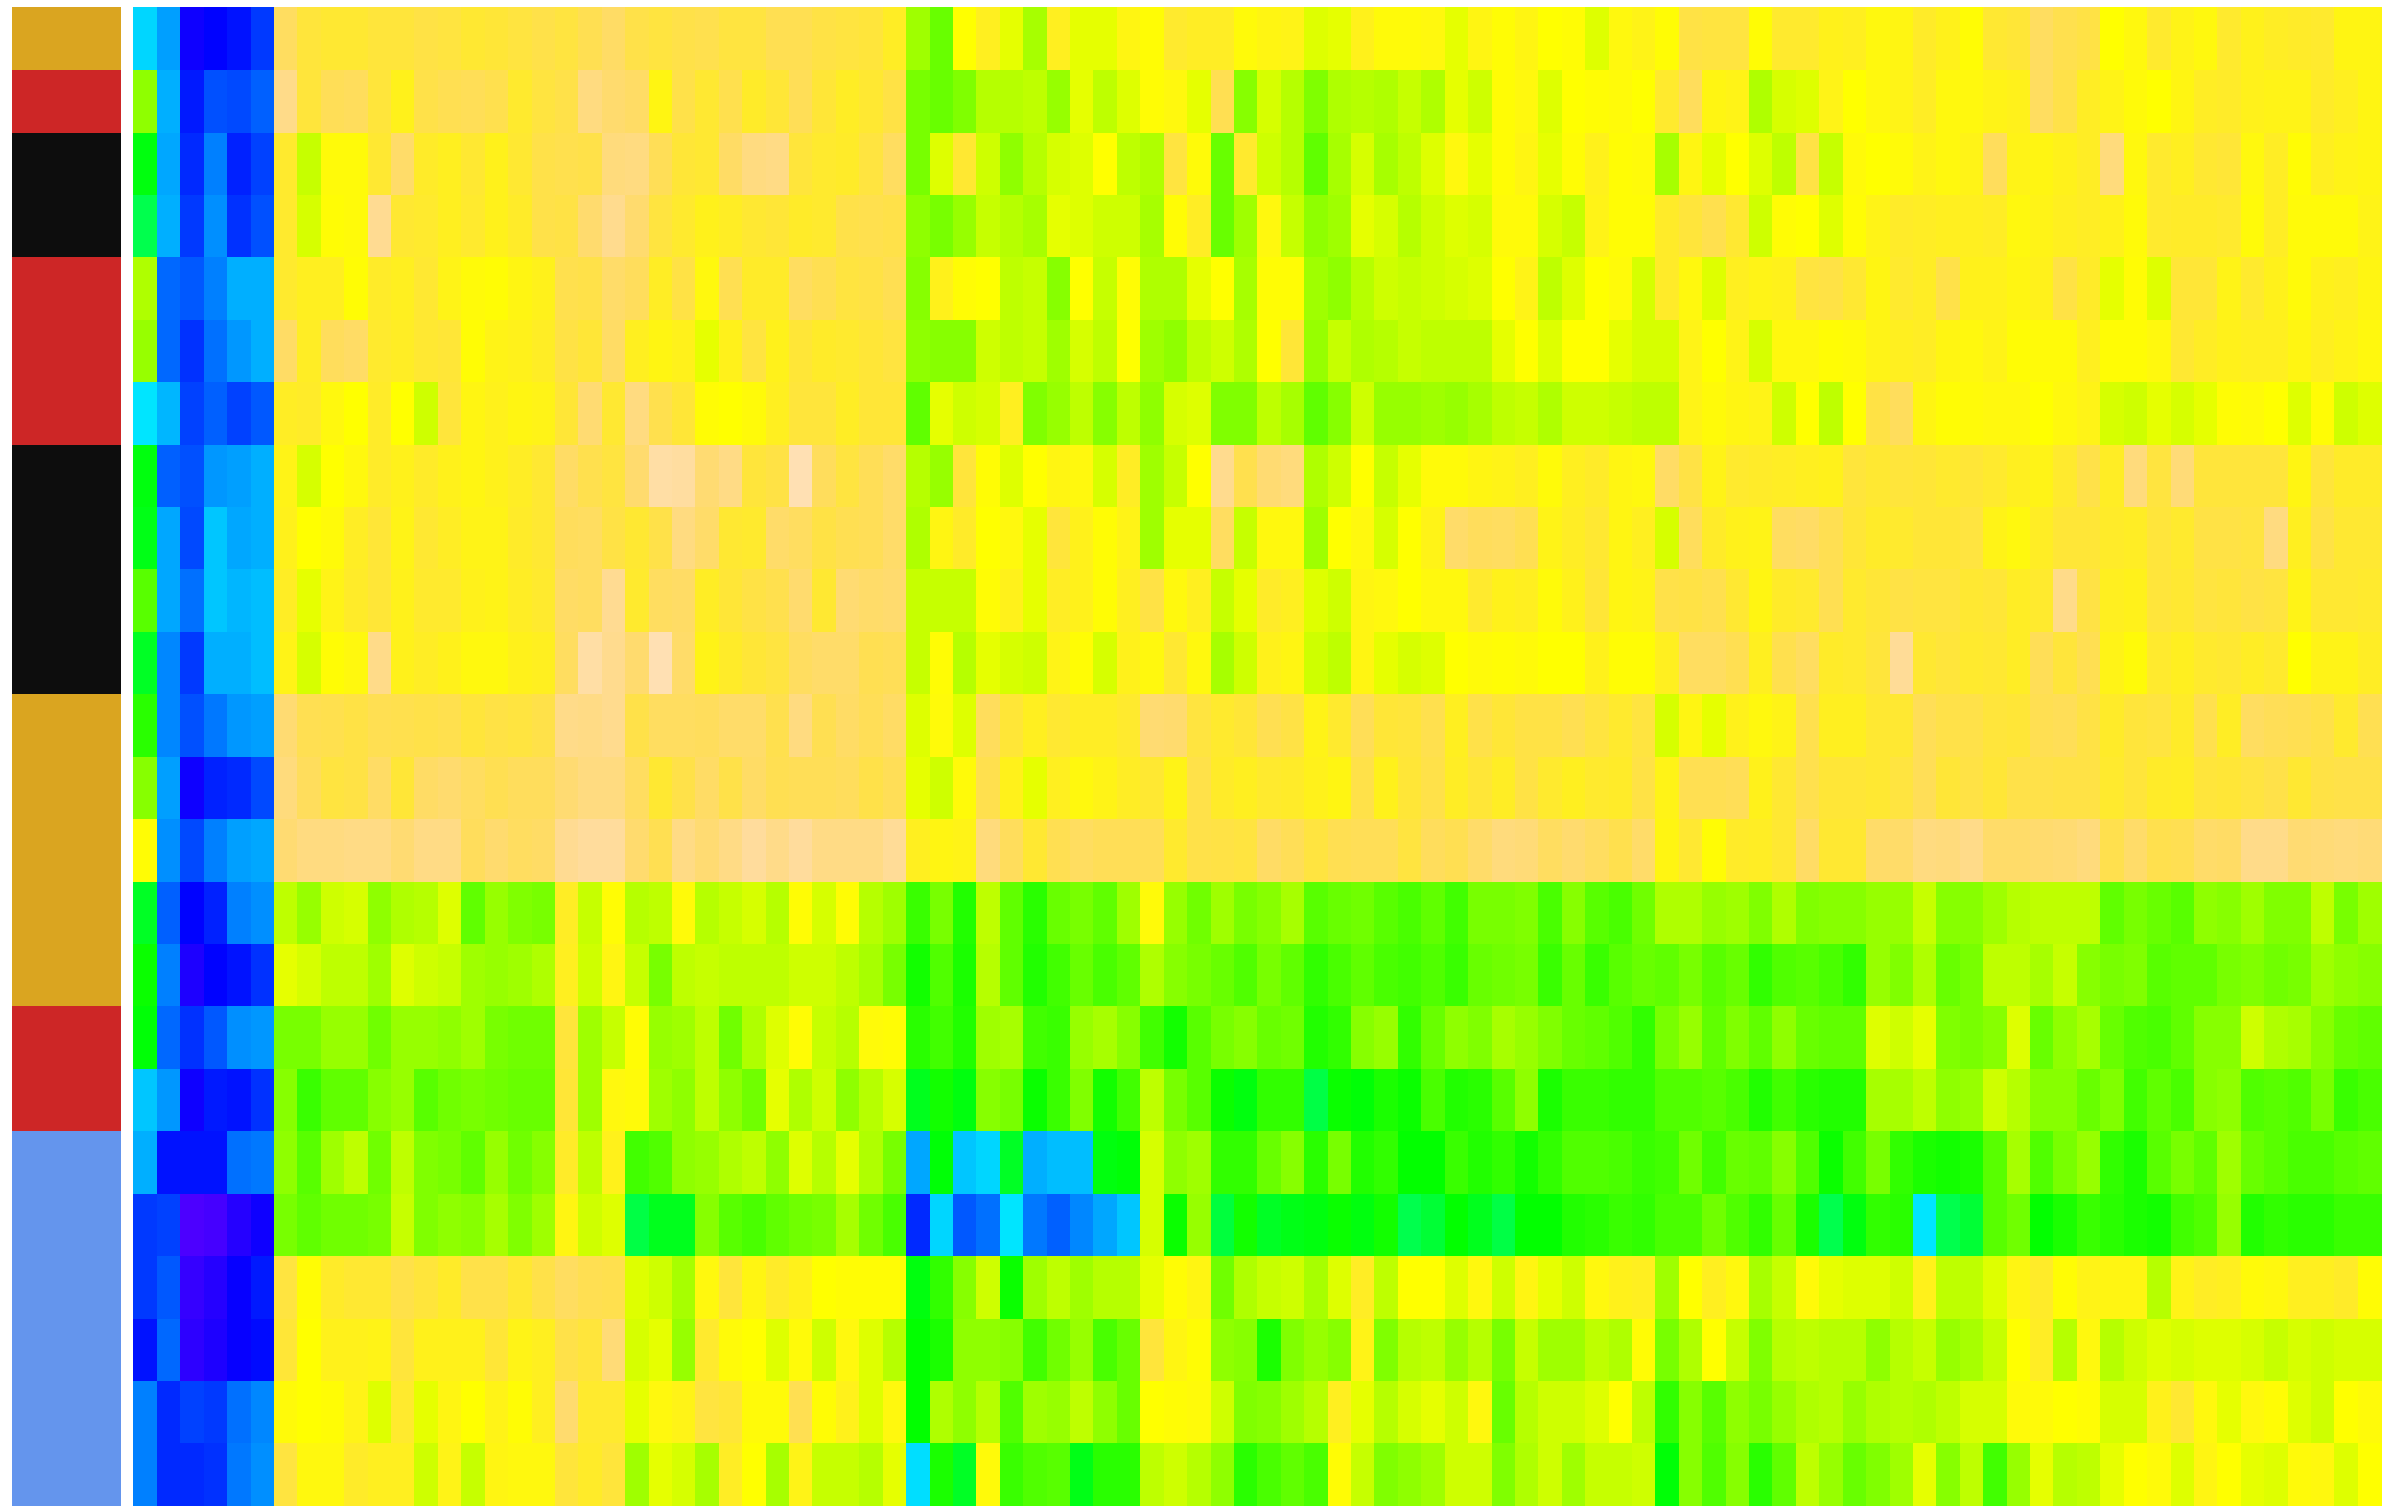

w 3  
r 3  
D 1  
D 4  
r 2  
r 4  
r 1  
D 3  
D 2  
D 5  
D 6  
w 2  
w 1  
w 4  
w 6  
w 5  
r 6  
r 5  
b 6  
b 5  
b 3  
b 1  
b 2  
b 4

E11 (Uridine Nucleoside)  
A71 (Negative Control F1)  
E03 (Methoxy Dihydroxyacetic Acid)  
E05 (Phenylethyl Acetic Acid)  
A77 (Hydroquinone)  
A06 (Methyl Propanoate)  
N01 L-Dipicolinic Acid  
H04 (DL-Aspartic Acid)  
F01 (Negative Control R2)  
Q01 (N-Acetyl-L-Cysteine)  
N01 (Thio-β-D-Glucosyl)  
H12 (Thiamine Hydrochloride)  
H05 (Thiouracil Acetic Acid)  
N01 L-Thio-β-D-Glucosyl  
H10 (D-Hydroxyphenyl Salicylic Acid)  
H08 (p-Amino Benzoic Salicylic Acid)  
H11 (Methoxy Salicylic Acid)  
E06 (Propylpropanoate)  
H07 (Hydroquinone)  
Q01 (Phenylethyl Propanoate)  
Q02 (Phenyl-β-D-Glucosyl Acetic Acid)  
A03 (Sodium Pyrophosphate)  
A05 (Thiopyranolone F1)  
E02 (Dipropylpropanoate F1)  
F12 L-Cysteine Acetic Acid  
E01 (D-Phenyl-D-Tyrosine)  
Q04 (D-Glucose-4-Phosphate)  
A02 (Sodium Propanoate)  
E03 (DL-L-Glutamic Acid)  
B07 (D-3-Phospho-β-D-Glucose)  
Q01 (β-Phenyl-β-D-Glucosyl Acetic Acid)  
E07 (β-Phenyl-β-D-Glucosyl Acetic Acid)  
E07 (α-Amino Propanoic Acid)  
C10 (Cytidine-5'-Monophosphate)  
B06 (Catalase Propanoate)  
E11 (Cytidine-2'-Cyclic Monophosphate)  
Q03 (Cytidine-5'-Phosphate)  
D07 (D-Phenyl-L-Threonine)  
F10 L-Cysteine Acetic Acid  
Q08 (Cytidine-2'-Monophosphate)  
E03 (Phenylpropanoate)  
E08 (Thiopyranolone-5'-Monophosphate)  
C12 (Cytidine-2',5'-Cyclic Monophosphate)  
D01 (D-Mannose-1-Phosphate)  
A05 (Thiamine Hydrochloride)  
A04 (Methoxy-3',5'-Cyclic Monophosphate)  
D10 (Uridine-5'-Monophosphate)  
F12 (Thiopyranolone-3',5'-Cyclic Monophosphate)  
D12 (Uridine-2',5'-Cyclic Monophosphate)  
Q08 (Cytidine-3'-Monophosphate)  
F11 (Cytosine)  
D05 (Uridine-2'-Monophosphate)  
E10 (Thiopyranolone-5'-Monophosphate)  
D11 (Uridine-2',5'-Cyclic Monophosphate)  
D09 (Uridine-5'-Monophosphate)  
F01 (Cyt-DNA)  
F04 (Dibenzofuran)  
E06 (D-Phenylethyl-Ethanolamine)  
F05 (Propylpropanoate R2)  
F08 (β-Cysteine)  
E02 (D-Phenyl-L-Tyrosine)  
E07 L-Cysteine  
Q10 (N-Acetyl-D-Aspartic Acid)  
Q06 (Glutathione)  
G04 (Guanosine-3',5'-Cyclic Monophosphate)  
A08 (Adenosine-2'-Monophosphate)  
A09 (Adenosine-2',3'-Cyclic Monophosphate)  
A00 (Adenosine-3'-Monophosphate)  
B10 (Guanosine-5'-Monophosphate)  
A10 (Adenosine-5'-Monophosphate)  
B08 (Guanosine-2'-Monophosphate)  
G04 (Guanosine-2'-Monophosphate)  
G04 (Guanosine-2',3'-Cyclic Monophosphate)  
D06 (D-Phenyl-L-Serine)  
Q08 (D-Glucosamine-6-Phosphate)  
Q04 (Phenyl-β-D-Glucosyl Acetic Acid)  
D05 (D-Phenyl-β-D-Glucosyl Acetic Acid)  
Q03 (β-D-Glucose-1-Phosphate)  
D02 (D-Mannose-6-Phosphate)  
H02 (Thiourea)  
B04 (β-Cyclodextrin Propanoate)  
B06 (D-2-Phenyl-β-D-Glucosyl Acetic Acid)  
G05 (β-Hex)  
G03 (Cytosine)  
G12 L-Methoxy Salicylic Acid  
G11 (L-Methoxy Salicylic Acid)  
G07 L-Methionine  
G06 (D-Methionine)  
F02 (Glycine)  
F06 (Dipropylpropanoate R2)  
G04 (β-L-Ethionine)  
G02 (β-Methyl-L-Cysteine)  
Q04 (Lactonine)  
F03 (Sodium Thiocarbonyl)

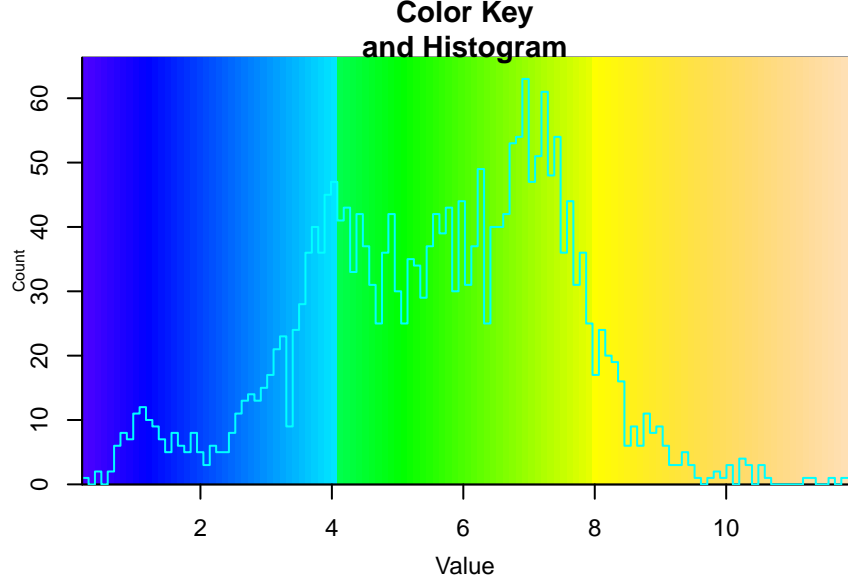

### PM04 strain 2 -mu

- Blue light
- Dark
- Red light
- White light

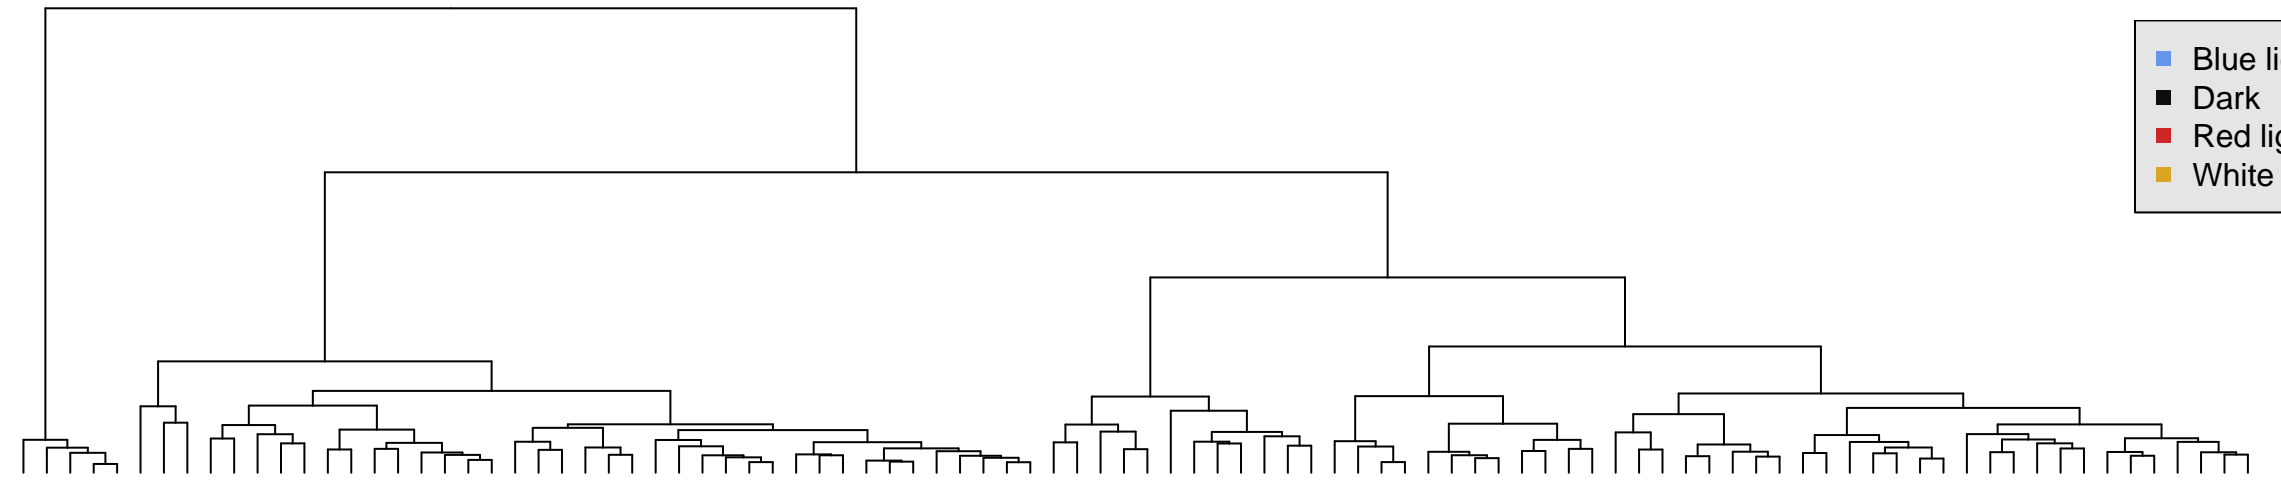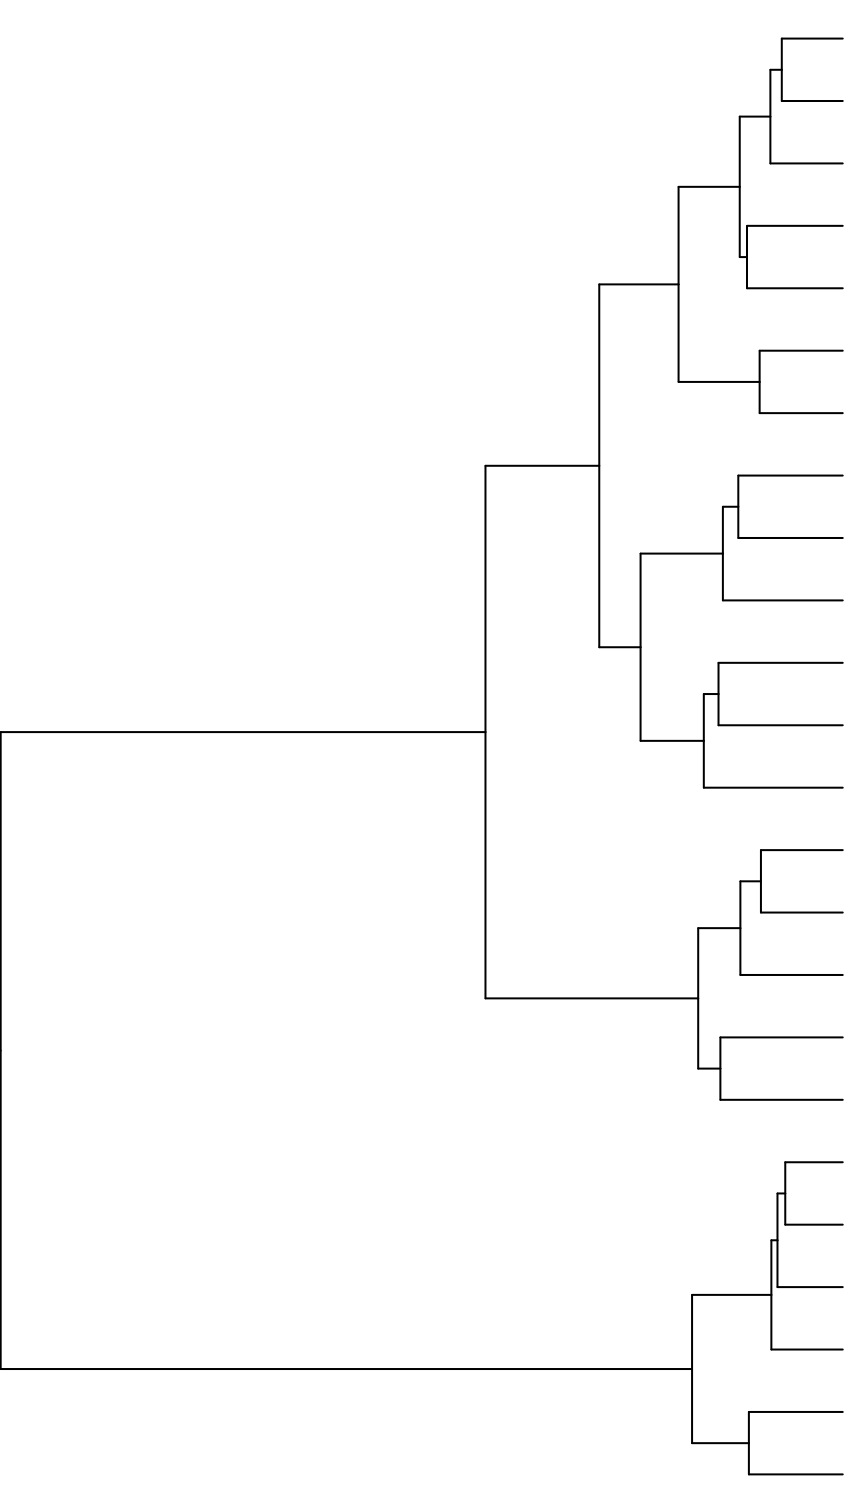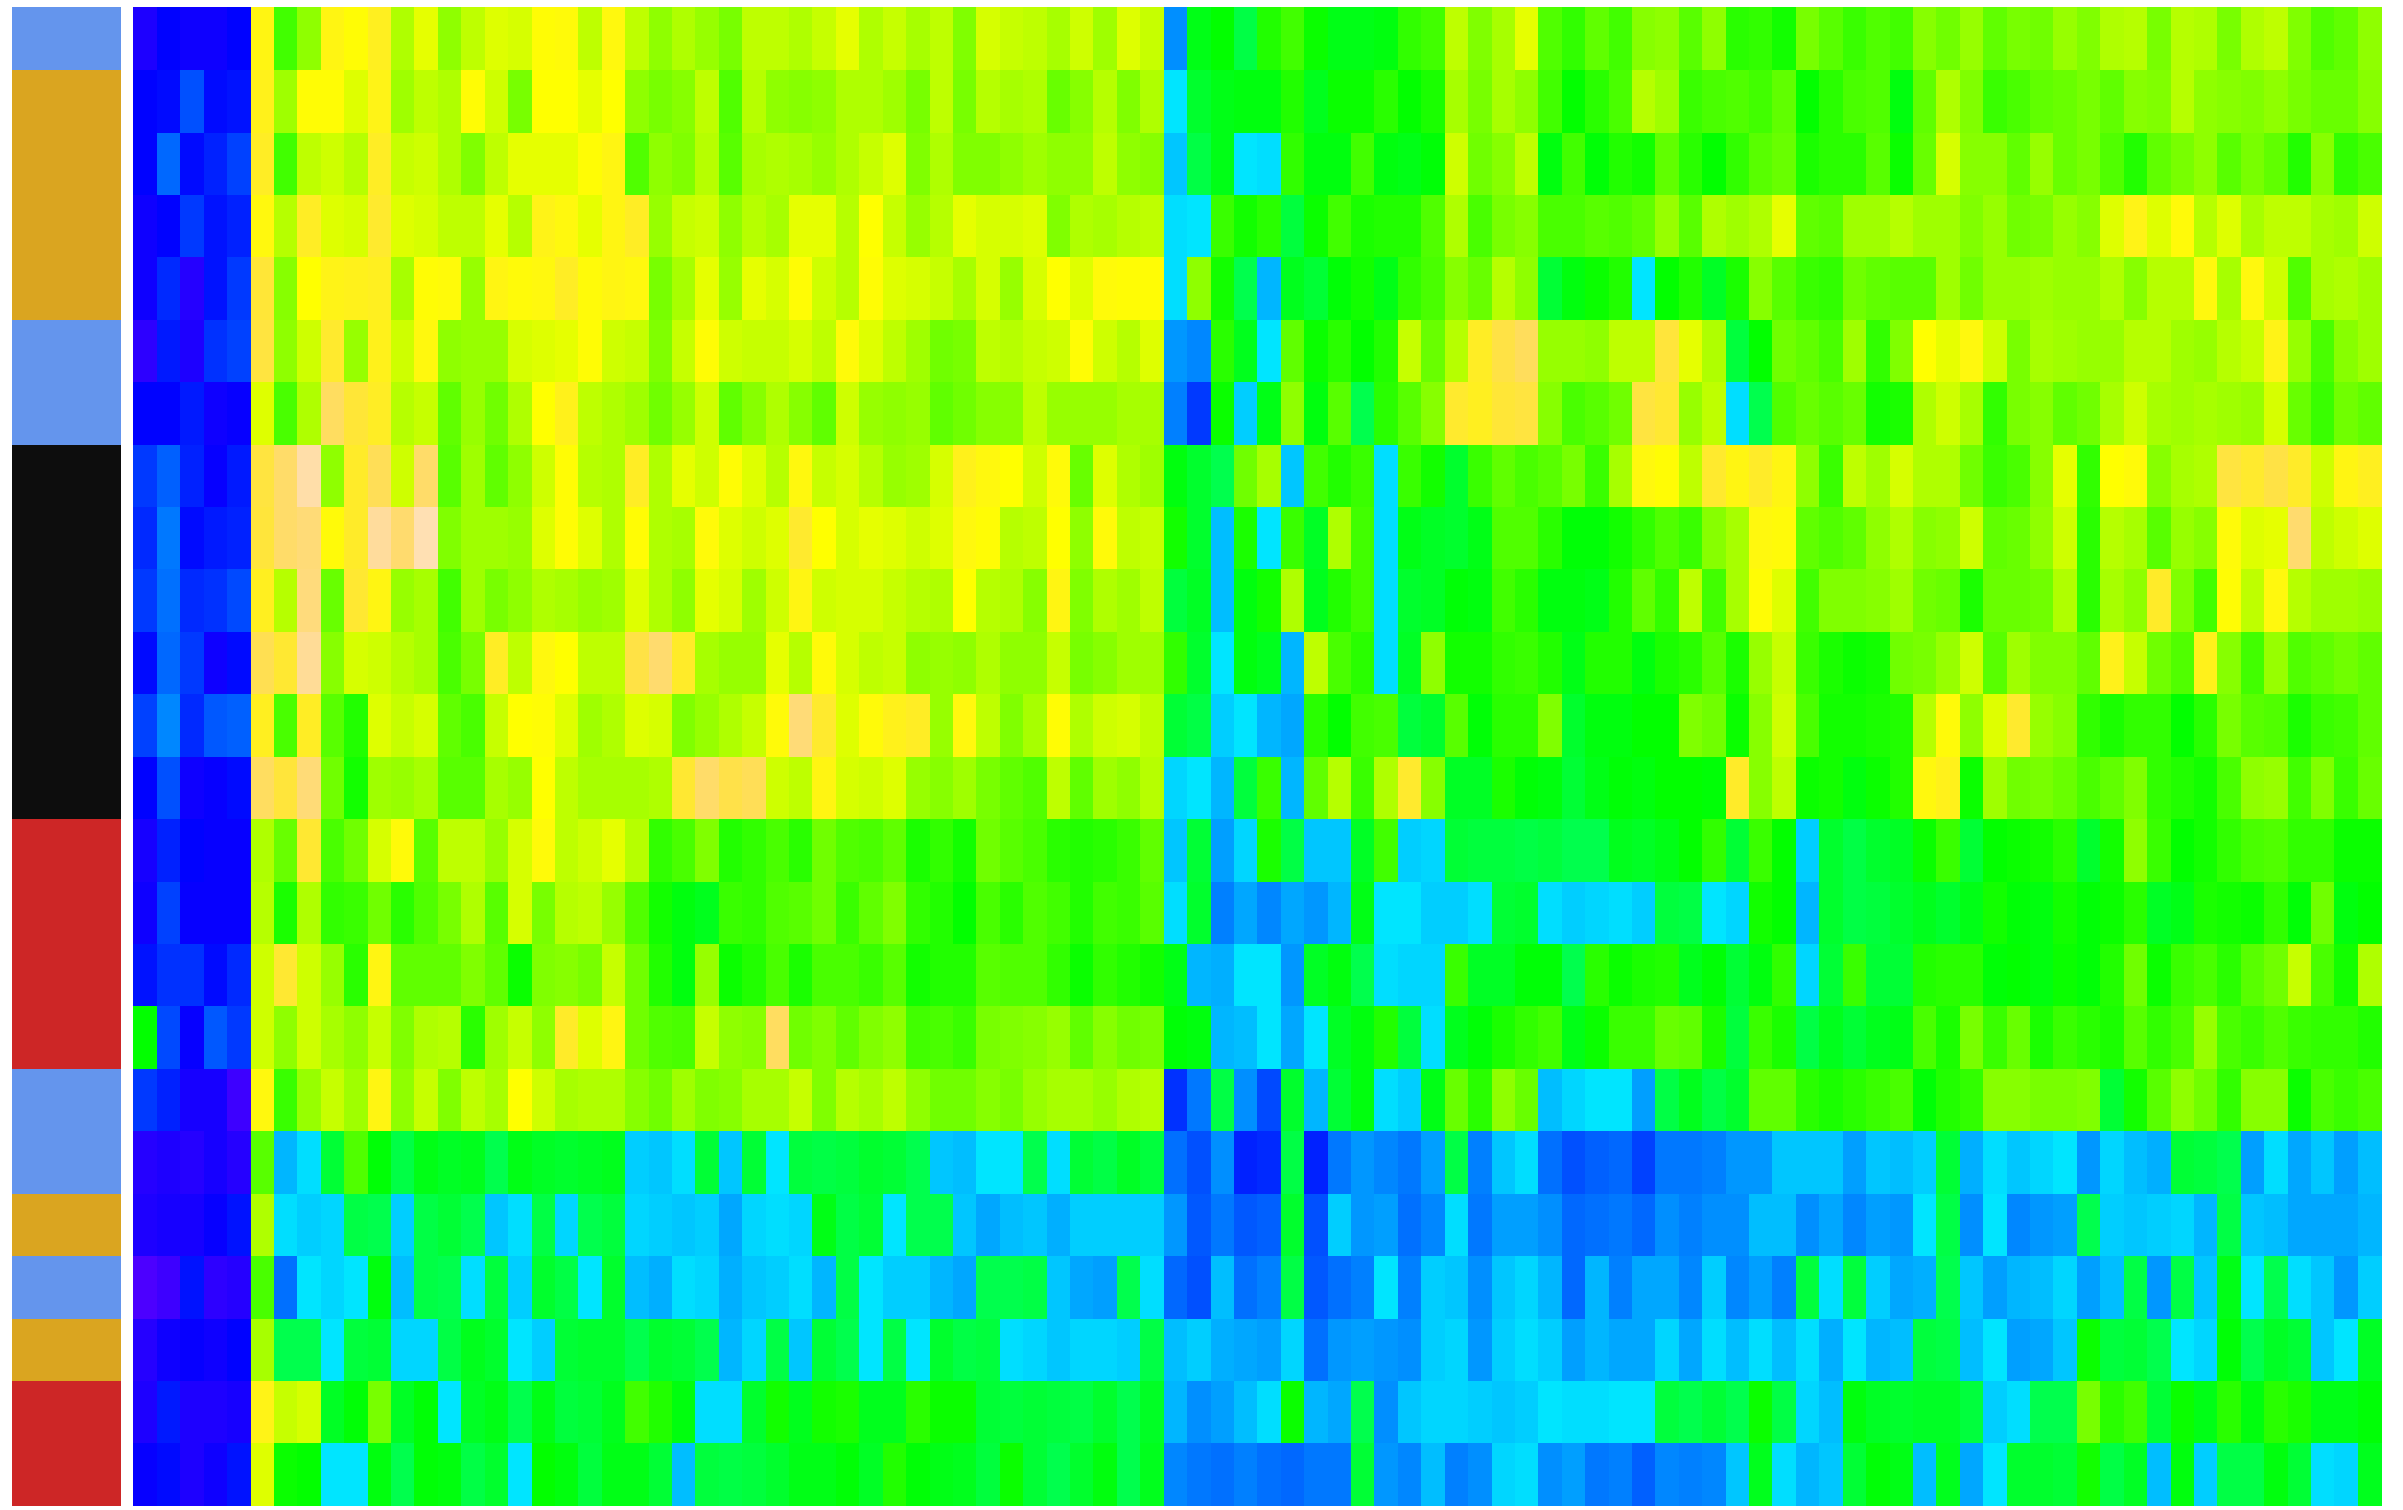

- E08 (Methoxy-Diisobutanoic Acid)
- E09 (Phosphono Acetic Acid)
- A07 (Negative Control F1)
- A07 (Hydroxyphenol)
- A08 (Methyl Phosphate)
- E04 (Phosphorylacetone)
- C04 (Phospho-Cytidic Acid)
- E07 (4-Aminobutanoic Acid)
- B03 (D,L-α-Glycolic Phosphate)
- C01 (Phosphonoacetyl Phosphate)
- N07 (Hydroxyurea)
- H02 (Thiourea)
- H05 (Thiourea)
- H04 (DL-Liponamide)
- H11 (L-Asparagine Acid)
- H12 (Thiamine Hydrochloride)
- C01 (N-Acetyl-L-Cysteine)
- H06 (D-Formyl Serine Sulfonic Acid)
- H05 (Thioacetamide Acid)
- F01 (Negative Control K2)
- M01 (Thio-β-D-Glucose)
- C04 (D-Glucose-6-Phosphate)
- G08 (DL-Me)
- F12 (L-Cysteine Sulfonic Acid)
- A02 (Sodium Phosphate)
- G11 (L-Methionine Sulfonamide)
- F06 (Dihydroxyacetone K2)
- G02 (S-Methyl-L-Cysteine)
- G08 (D-Methionine)
- F03 (Sodium Thiosulfate)
- G06 (DL-Ethionine)
- F05 (Thiothiazine K2)
- D04 (Phenyl-L-Alanine)
- E06 (D-Phosphoryl-Ethanolamine)
- H11 (Methoxy Sulfonic Acid)
- H10 (β-Hydroxybutanoic Sulfonic Acid)
- H09 (Sulfate Sulfonic Acid)
- F07 (L-Cysteine)
- F04 (Dibutyl)
- E02 (Sulfate)
- C05 (Glutamine)
- G04 (L-Asparagine)
- B06 (Catalytic Phosphate)
- E11 (Ureido-Naphthalene)
- C08 (Cytidine-2'-Morphophosphate)
- C18 (Cytidine-5'-Morphophosphate)
- (Glutamine-2',5'-Cyclic Morphophosphate)
- B07 (Thiothiazine F1)
- H11 (Cytidine-2',3'-Cyclic Morphophosphate)
- A03 (Sodium Pyrophosphate)
- F10 (L-Cysteine Acid)
- A04 (Thiothiazine)
- D12 (Uridine-3',5'-Cyclic Morphophosphate)
- D10 (Uridine-5'-Morphophosphate)
- D01 (D-Mannose-1-Phosphate)
- D11 (Uridine-2',3'-Cyclic Morphophosphate)
- D09 (Uridine-2'-Morphophosphate)
- D05 (Uridine-2'-Morphophosphate)
- A10 (Adenosine-5'-Morphophosphate)
- I12 (Cytidine-3',5'-Cyclic Morphophosphate)
- B10 (Guanosine-5'-Morphophosphate)
- (Guanosine-2',3'-Cyclic Morphophosphate)
- A09 (Adenosine-2'-Morphophosphate)
- B09 (Guanosine-2'-Morphophosphate)
- A08 (Adenosine-2'-Morphophosphate)
- I12 (Thymidine-3',5'-Cyclic Morphophosphate)
- E03 (Phosphoacetate)
- G12 (L-Methionine Sulfate)
- C08 (Cytidine-2'-Morphophosphate)
- (Adenosine-2',3'-Cyclic Morphophosphate)
- D07 (D-Phospho-L-Threonine)
- E10 (Thymidine-5'-Morphophosphate)
- B09 (Thymidine-3'-Morphophosphate)
- A05 (Phosphoacetate)
- B02 (Dihydroxyacetone F1)
- B02 (Guanosine-2'-Morphophosphate)
- F11 (Cytosine)
- F02 (Cyt-Cyt)
- F08 (D-Cytosine)
- G10 (N-Acetyl-DL-Methionine)
- C03 (Cytosidine-5'-Phosphate)
- C03 (α-D-Glucose-1-Phosphate)
- B06 (D-β-Phospho-β-Glucose Acid)
- B04 (β-Oxyethyl Phosphate)
- D02 (D-Mannose-6-Phosphate)
- B01 (D-Phospho-D-Tyrosine)
- B07 (D-β-Phospho-β-Glucose Acid)
- D06 (D-Phospho-D-Serine)
- D07 (L-Phospho-D-Glutamic Acid)
- C06 (D-Glucosamine-6-Phosphate)
- E05 (D-Phospho-L-Tyrosine)
- C05 (D-Deoxy-D-Glucose-6-Phosphate)
- D08 (D-Phospho-L-Serine)

- b 3
- w 1
- w 2
- w 3
- w 4
- b 2
- b 1
- D 4
- D 6
- D 5
- D 1
- D 2
- D 3
- r 3
- r 4
- r 1
- r 2
- b 4
- b 6
- w 6
- b 5
- w 5
- r 5
- r 6

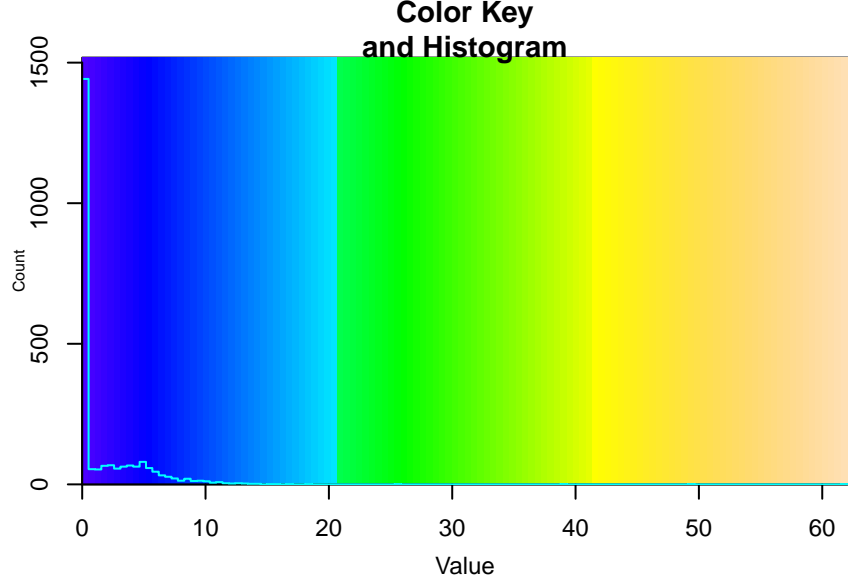

### PM04 strain 2 -lambda

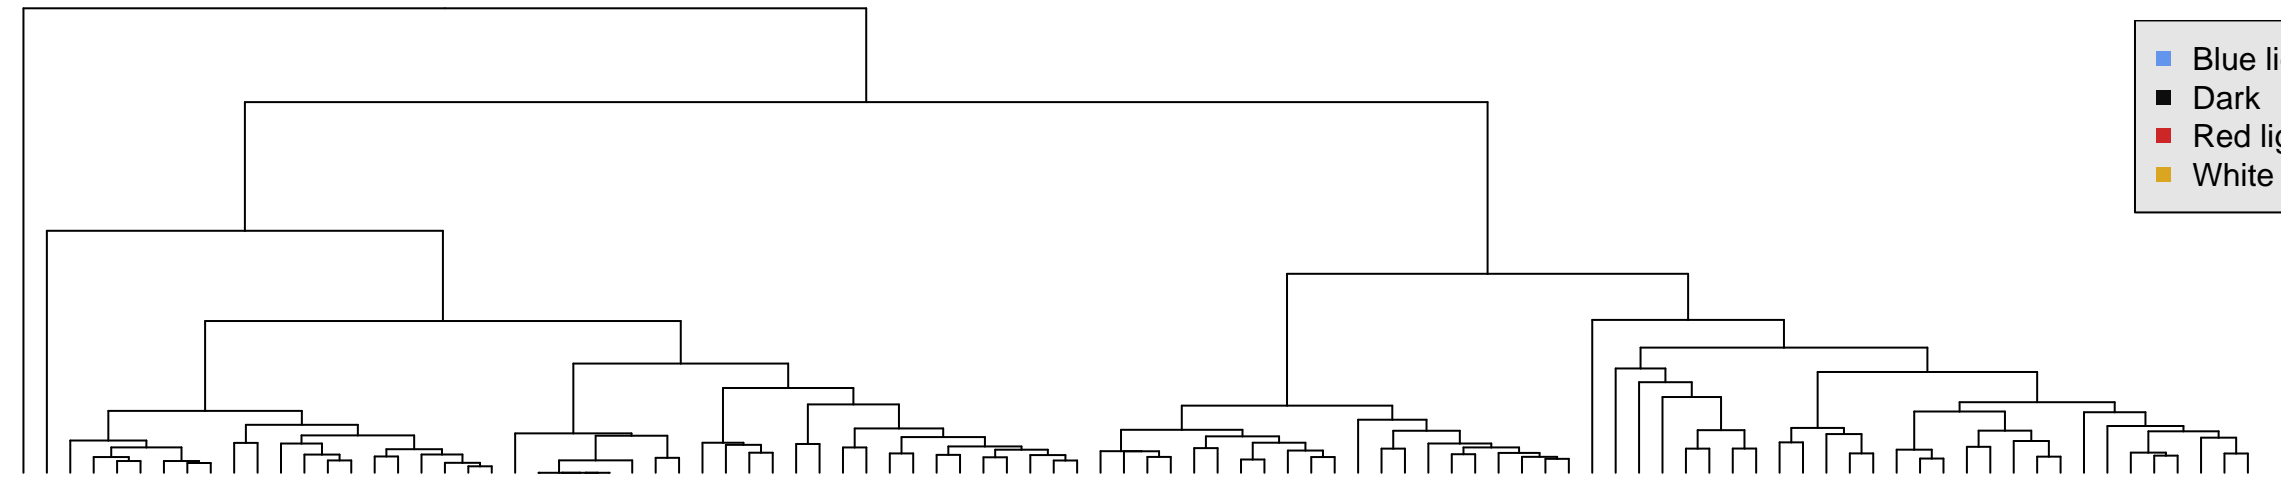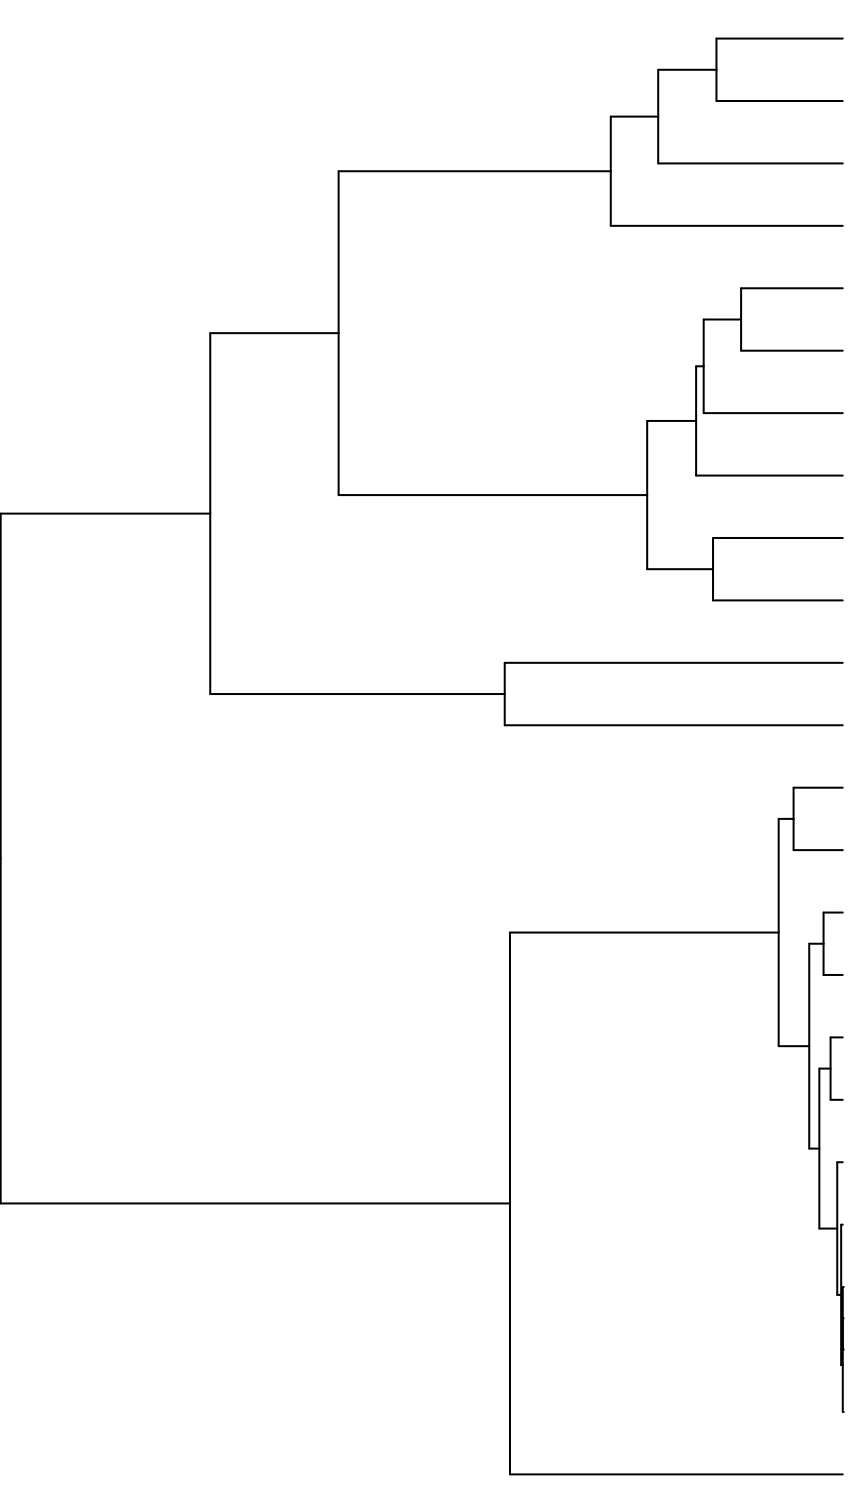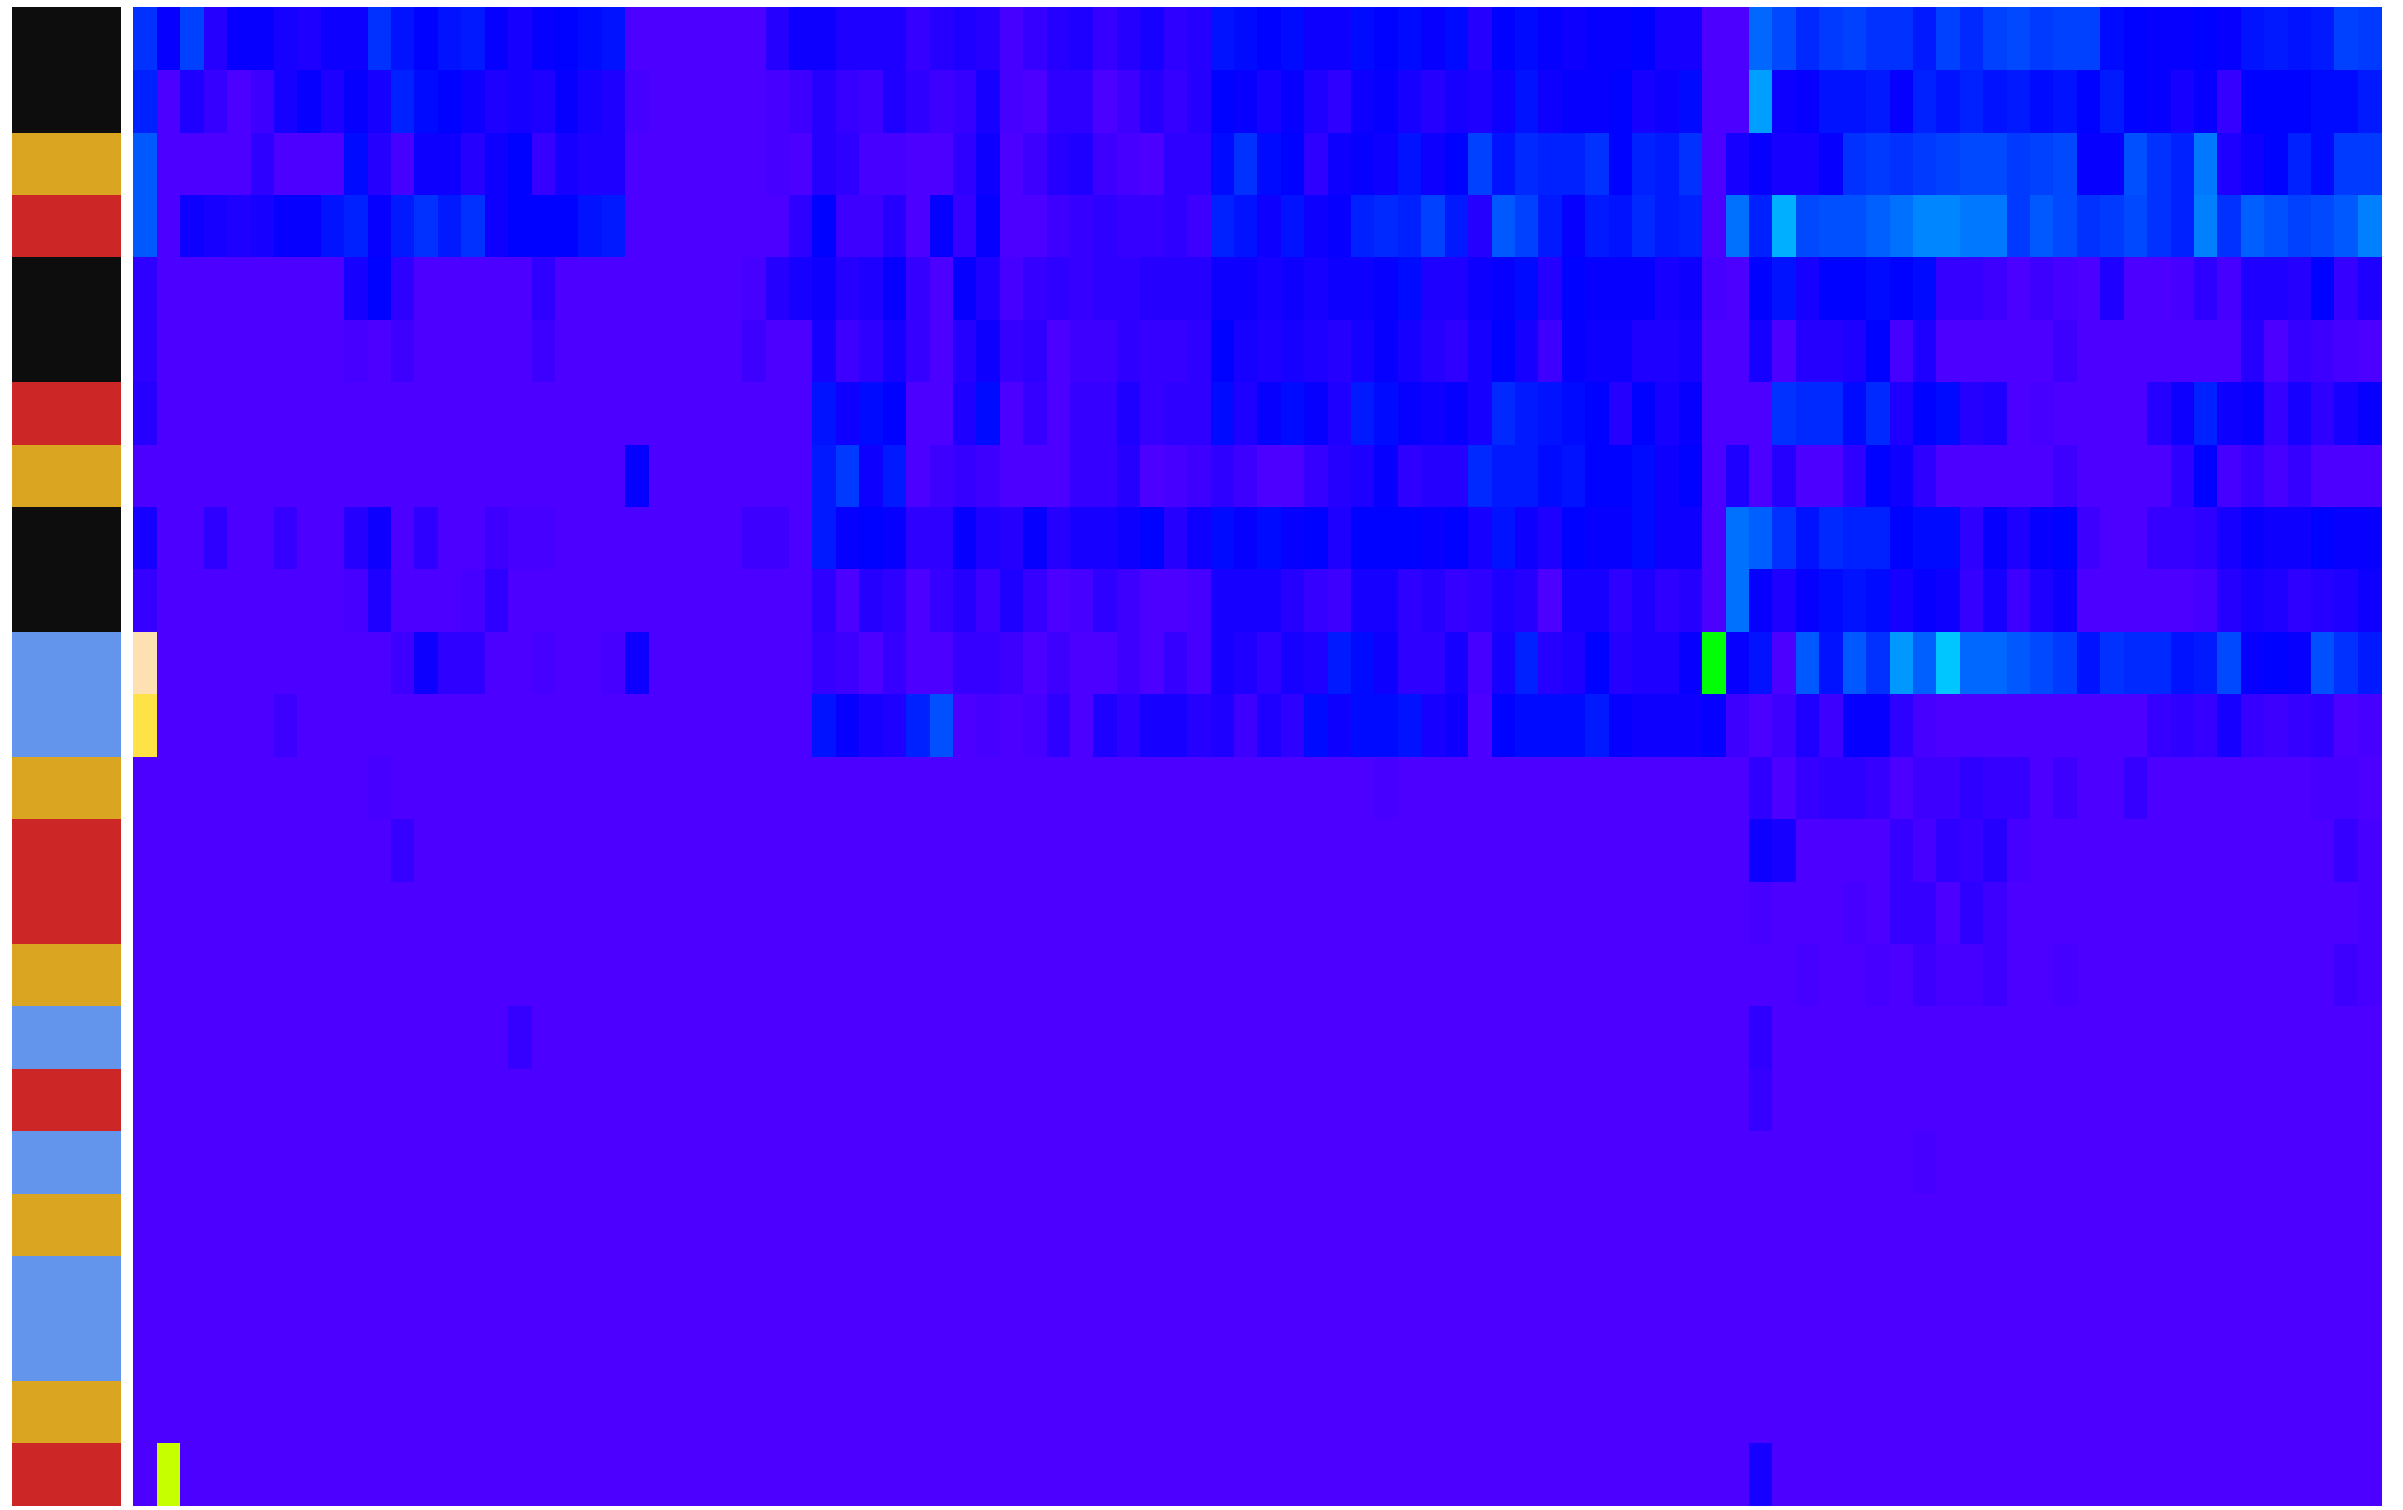

- G08 (Cytidine 2'-Morphosulphate)
- E08 (Methylene Diphosphonic Acid)
- (Glucosamine 3'-Cyclic Morphosulphate)
- B00 (DL-α-Glyceral Phosphate)
- B02 (DL-α-Glyceral Phosphate)
- (Adenosine 2'-Cyclic Morphosulphate)
- E01 (D-Phospho-D-Tyrosine)
- E03 (Phosphono Acetic Acid)
- F12 (L-Cysteine Sulfinic Acid)
- D11 (Uridine 2'-Cyclic Morphosulphate)
- 2 (Thymidine 3'-Cyclic Morphosulphate)
- E11 (Cytidine 2'-Cyclic Morphosulphate)
- B00 (Glucosamine 2'-Morphosulphate)
- B10 (Glucosamine 5'-Morphosulphate)
- B00 (Glucosamine 3'-Morphosulphate)
- B04 (β-Glyceral Phosphate)
- E11 (Fructose Hexaphosphate)
- A02 (Thiopyridosulphate)
- A10 (Adenosine 5'-Morphosulphate)
- (Glucosamine 2'-Cyclic Morphosulphate)
- A00 (Adenosine 5'-Morphosulphate)
- A03 (Sodium Pyrophosphate)
- D01 (D-Mannose 1-Phosphate)
- A07 (Hydrophosphate)
- A01 (Nucleic Control #1)
- A06 (Thiopyridosulphate)
- H12 (Nucleosylphosphate Sulphate)
- A02 (Sodium Phosphate)
- D12 (Uridine 3'-Cyclic Morphosulphate)
- H05 (Threonine)
- H04 (DL-Lipamide)
- H10 (L-Hydroxyphenyl Sulfonic Acid)
- H08 (p-Amino Benzoic Sulfonic Acid)
- G01 (N-Acetyl-L-Cysteine)
- G01 (Phosphoryl Pyruvate)
- G11 (L-Methionine Sulfonate)
- F08 (Cys-Gly)
- (Adenosine 3'-Cyclic Morphosulphate)
- H11 (Methionine Sulfonic Acid)
- F01 (Nucleic Control #2)
- G12 (L-Methionine Sulfonate)
- N01 (L-Oxalidic Acid)
- H03 (Ibuprofen Sulfonic Acid)
- H02 (Threonine)
- H03 (L-Thio-β-D-Glucose)
- F06 (Glycylglycine #2)
- F17 (L-Cysteine)
- G10 (N-Acetyl-DL-Methionine)
- F08 (D-Cysteine)
- G06 (Glutathione)
- B02 (Dihydrophosphate #1)
- F10 (L-Cysteine Acid)
- F03 (Sodium Thiosulfate)
- G03 (Cystathionine)
- H07 (Hydroxamate)
- F02 (Glycine)
- F11 (Cysteine)
- E04 (Phosphorylpyruvate)
- F04 (Threonine)
- G06 (D,L-Ethionine)
- G06 (D-Methionine)
- G02 (D-Methyl-L-Cysteine)
- G04 (Lactonine)
- G07 (L-Methionine)
- G09 (Gly-Met)
- A04 (Thiopyridosulphate)
- B01 (Thiopyridosulphate #1)
- B06 (Cationic Phosphate)
- C02 (Phospho-Glyceric Acid)
- E10 (Thymidine 5'-Morphosulphate)
- E00 (Thymidine 3'-Morphosulphate)
- E00 (Phosphonamide)
- E06 (D-Phosphoryl-Ethionamine)
- D05 (D-Phospho-D-Serine)
- E07 (L-Aminocaproic Phosphonic Acid)
- D07 (D-Phospho-L-Threonine)
- B06 (D-2-Phospho-Glyceric Acid)
- C06 (D-Glucosamine-6-Phosphate)
- C10 (Cytidine 5'-Morphosulphate)
- C08 (D-Threonyl-D-Glucose-6-Phosphate)
- B07 (D-2-Phospho-Glyceric Acid)
- A08 (Adenosine 2'-Morphosulphate)
- D10 (Uridine 5'-Morphosulphate)
- C09 (Cytidine 3'-Morphosulphate)
- D08 (Uridine 2'-Morphosulphate)
- D05 (Uridine 3'-Morphosulphate)
- D02 (D-Mannose-6-Phosphate)
- C08 (D-Glucose 6-Phosphate)
- C03 (α-D-Glucose-1-Phosphate)
- D04 (Phospho-L-Arginine)
- E02 (D-Phospho-L-Tyrosine)
- D06 (D-Phospho-L-Serine)
- C07 (E-Phospho-Glyceric Acid)
